# Supplementary material for: Sc(OTf)3-catalyzed cyclization of α-allylated 1,3-dicarbonyls: an efficient access to 2,2-disubstituted 2,3-dihydrofuran derivatives
Source: Royal Society of Chemistry journal article supplement (doi:10.1039/c6ra14051c), 2016-01-01

# Supporting Information

## Sc(OTf)<sub>3</sub>-Catalyzed Cyclization of $\alpha$ -Allylated 1,3-Dicarbonyls: an Efficient Access to 2,2-Disubstituted 2,3-Dihydrofuran Derivatives

Ziping Cao,<sup>a,b,\*</sup> Rumeng Zhang,<sup>a</sup> Xin Meng,<sup>a</sup> Hui Li,<sup>a</sup> Jie Li,<sup>a</sup> Hongbo Zhu,<sup>a</sup> Guang Chen,<sup>a,b</sup> Xuejun Sun<sup>a</sup> and Jinmao You<sup>a,b,\*</sup>

<sup>a</sup> School of Chemistry and Chemical Engineering, Qufu Normal University, Qufu 273165, Shandong, China.

<sup>b</sup> Shandong Key Laboratory of Life-Organic Analysis, Key Laboratory of Pharmaceutical Intermediates and Analysis of Natural Medicine, Qufu 273165, Shandong, China.

Email: caozp\_qfnu@163.com; jmyou6304@163.com

### Table of Contents

|                                                                               |           |
|-------------------------------------------------------------------------------|-----------|
| <b>1- General information</b>                                                 | <b>2</b>  |
| <b>2- Synthesis of <math>\alpha</math>-allylated 1,3-dicarbonyl compounds</b> | <b>3</b>  |
| <b>3- General procedure for synthesis of 2,3-dihydrofurans</b>                | <b>3</b>  |
| <b>4- Characterization for all compounds</b>                                  | <b>4</b>  |
| <b>5- Copies of NMR spectra</b>                                               | <b>19</b> |

## 1- General information

All reactions were conducted in clean glassware with magnetic stirring. Commercially available reagents were used as received without further purification. Solvents were treated prior to use according to the standard methods. For chromatographic purification, technical-grade solvents were used. Purified compounds were further dried on high vacuum. NMR-spectra were measured in the given solvent at RT on *Bruker Ascend™ 500M* (500.1 MHz,  $^1\text{H}$ ; 125.8 MHz,  $^{13}\text{C}$ ) instrument operating at the denoted spectrometer frequency given in mega Hertz (MHz) for the specified nucleus. Chemical shifts are given in parts per million (ppm) relative to tetramethylsilane (TMS) as an external standard for  $^1\text{H}$ - and  $^{13}\text{C}$ -NMR spectra and calibrated against the solvent residual peak. Multiplicities are reported as follows: s = singlet, d = doublet, t = triplet, q = quartet, m = multiplet, or as combination of them. Coupling constants  $J$  are given in Hertz (Hz). High resolution mass spectra were obtained with a Micromass GCT-TOF mass spectrometer.

## 2- Synthesis of $\alpha$ -allylated 1,3-dicarbonyl compounds

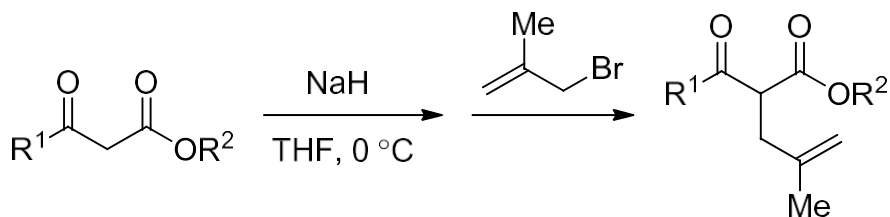

To a mixture of NaH (10 mmol, 60% dispersion in mineral oil) in dry THF (40 mL) in ice-water bath was added  $\beta$ -ketoester (10 mmol) dropwise, and the resulting mixture was stirred for about 20 minutes. In the same temperature, 3-bromo-2-methylpropene (10 mmol) was added dropwise, and then the reaction was warmed to room temperature for 6-12 hours. The reaction was quenched with sat.  $NH_4Cl$  solution (10 mL) and water (10 mL) sequentially. The subsequent mixture was extracted with ethyl ether (20 mL X 3). The organic phase was washed with brine, dried over  $Na_2SO_4$ , and filtered. The filtrate was condensed to the oily liquid which was purified by column chromatography on silica gel (200-300 mesh, eluent: PE/EA = 100/1 to 20/1) to provide the pure product **5**.

## 3- General procedure for synthesis of 2,3-dihydrofurans

To a solution of the  $\alpha$ -allylated 1,3-dicarbonyl compound **5** (0.2 mmol) in 1,2-dichloroethane (2 mL) was added  $Sc(OTf)_3$  (10 mol%) at rt. The resulting mixture was heated to 60 °C, generally for 1.5 h. After completion, the mixture was concentrated and purified by column chromatography on silica gel (200-300 mesh, eluent: PE/EA = 20/1) to provide the desired 2,3-dihydrofuran product **6**.

#### 4- Characterization for all compounds

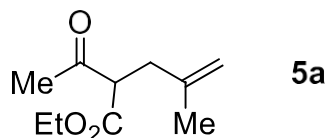

Compound **5a** was obtained as colourless oil in 65% yield.

**<sup>1</sup>H NMR** (500 MHz, CDCl<sub>3</sub>): δ 4.78 (s, 1H), 4.69 (s, 1H), 4.18 (q, *J* = 7.2 Hz, 2H), 3.66 (dd, *J* = 7.7, 7.6 Hz, 1H), 2.89 (dd, *J* = 15.2, 8.1 Hz, 1H), 2.54 (dd, *J* = 15.2, 7.2 Hz, 1H), 2.23 (s, 3H), 1.73 (s, 3H), 1.26 (t, *J* = 7.2 Hz, 3H).

**<sup>13</sup>C NMR** (125.8 MHz, CDCl<sub>3</sub>): δ 202.6, 169.4, 141.8, 112.2, 61.4, 58.2, 35.8, 28.8, 22.4, 14.1.

**IR** (KBr, cm<sup>-1</sup>): 1746, 1712, 1653.

**HRMS** (ESI) calcd for C<sub>10</sub>H<sub>17</sub>O<sub>3</sub> (M+H)<sup>+</sup>: 185.1172; Found: 185.1175.

(Ref: B. M. Šmit and R. Z. Pavlović, *Tetrahedron*, 2015, **71**, 1101.)

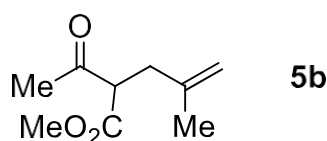

Compound **5b** was obtained as colourless oil in 70% yield.

**<sup>1</sup>H NMR** (500 MHz, CDCl<sub>3</sub>): δ 4.78 (s, 1H), 4.68 (s, 1H), 3.72 (s, 3H), 3.68 (dd, *J* = 7.7, 7.6 Hz, 1H), 2.58 (dd, *J* = 15.1, 8.1 Hz, 1H), 2.54 (dd, *J* = 15.1, 7.2 Hz, 1H), 2.23 (s, 3H), 1.73 (s, 3H).

**<sup>13</sup>C NMR** (125.8 MHz, CDCl<sub>3</sub>): δ 202.5, 169.9, 141.8, 112.3, 58.1, 52.4, 35.8, 28.8, 22.4.

**IR** (KBr, cm<sup>-1</sup>): 1740, 1710, 1637, 1442, 1357.

**HRMS** (ESI) calcd for C<sub>9</sub>H<sub>15</sub>O<sub>3</sub> (M+H)<sup>+</sup>: 171.1016; Found: 171.1020.

(Ref: C. M. R. Volla, S. R. Dubbaka and P. Vogel, *Tetrahedron*, 2009, **65**, 504.)

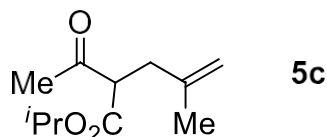

Compound **5c** was obtained as colourless oil in 60% yield.

**<sup>1</sup>H NMR** (500 MHz, CDCl<sub>3</sub>): δ 5.04 (sept, *J* = 6.3 Hz, 1H), 4.77 (s, 1H), 4.68 (s, 1H), 3.61 (dd, *J* = 7.8, 7.5 Hz, 1H), 2.57 (dd, *J* = 15.2, 8.4 Hz, 1H), 2.52 (dd, *J* = 15.2, 7.1 Hz, 1H), 2.22 (s, 3H), 1.73 (s, 3H), 1.23 (d, *J* = 6.3 Hz, 6H).

**<sup>13</sup>C NMR** (125.8 MHz, CDCl<sub>3</sub>): δ 202.6, 168.9, 141.9, 112.1, 69.0, 58.4, 35.7, 28.7, 22.4, 21.6, 21.5.

**IR** (KBr, cm<sup>-1</sup>): 1738, 1719, 1376, 1107.

**HRMS** (ESI) calcd for C<sub>11</sub>H<sub>19</sub>O<sub>3</sub> (M+H)<sup>+</sup>: 199.1329; Found: 199.1323.

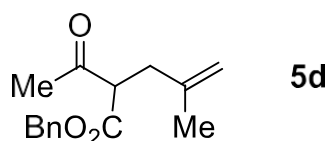

Compound **5d** was obtained as colourless oil in 58% yield.

**<sup>1</sup>H NMR** (500 MHz, CDCl<sub>3</sub>): δ 7.39-7.31 (m, 5H), 5.16 (s, 2H), 4.76 (s, 1H), 4.67 (s, 1H), 3.72 (dd, *J* = 7.8, 7.5 Hz, 1H), 2.60 (dd, *J* = 15.2, 8.2 Hz, 1H), 2.56 (dd, *J* = 15.2, 7.1 Hz, 1H), 2.19 (s, 3H), 1.72 (s, 3H).

**<sup>13</sup>C NMR** (125.8 MHz, CDCl<sub>3</sub>): δ 202.3, 169.3, 141.7, 135.2, 128.6, 128.5, 128.3, 112.3, 67.2, 58.2, 35.8, 28.8, 22.4.

**IR** (KBr, cm<sup>-1</sup>): 1754, 1718, 1656, 1462.

**HRMS** (ESI) calcd for C<sub>15</sub>H<sub>19</sub>O<sub>3</sub> (M+H)<sup>+</sup>: 247.1329; Found: 247.1330.

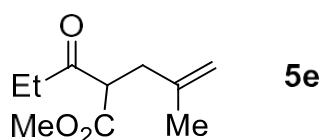

Compound **5e** was obtained as colourless oil in 62% yield.

**<sup>1</sup>H NMR** (500 MHz, CDCl<sub>3</sub>): δ 4.77 (s, 1H), 4.67 (s, 1H), 3.71 (s, 3H), 3.73-3.67 (m, 1H), 2.65-2.45 (m, 4H), 1.72 (s, 3H), 1.05 (t, *J* = Hz, 3H).

**<sup>13</sup>C NMR** (125.8 MHz, CDCl<sub>3</sub>): δ 205.2, 170.0, 141.9, 112.2, 57.1, 52.4, 35.9, 35.3, 22.4, 7.5.

**IR** (KBr, cm<sup>-1</sup>): 1717, 1652, 919.

**HRMS** (ESI) calcd for C<sub>10</sub>H<sub>17</sub>O<sub>3</sub> (M+H)<sup>+</sup>: 185.1172; Found: 185.1175.

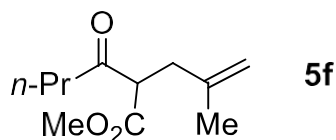

Compound **5f** was obtained as colourless oil in 65% yield.

**<sup>1</sup>H NMR** (500 MHz, CDCl<sub>3</sub>): δ 4.77 (s, 1H), 4.67 (s, 1H), 3.71 (s, 3H), 3.74-3.66 (m, 1H), 2.60-2.42 (m, 4H), 1.72 (s, 3H), 1.64-1.55 (m, 2H), 0.89 (t, *J* = 7.4 Hz, 3H).

**<sup>13</sup>C NMR** (125.8 MHz, CDCl<sub>3</sub>): δ 204.6, 170.0, 141.9, 112.2, 57.4, 52.4, 43.8, 35.8, 22.4, 16.8, 13.5.

**IR** (KBr, cm<sup>-1</sup>): 1701, 1673.

**HRMS** (ESI) calcd for C<sub>11</sub>H<sub>19</sub>O<sub>3</sub> (M+H)<sup>+</sup>: 199.1329; Found: 199.1330.

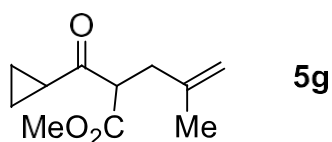

Compound **5g** was obtained as colourless oil in 68% yield.

**<sup>1</sup>H NMR** (500 MHz, CDCl<sub>3</sub>): δ 4.79-4.77 (m, 1H), 4.72-4.69 (m, 1H), 3.84 (dd, *J* = 8.0, 7.1 Hz, 1H), 3.73 (s, 3H), 2.66-2.56 (m, 2H), 2.13-2.05 (m, 1H), 1.74 (s, 3H), 1.10-1.02 (m, 2H), 0.96-0.91 (m, 2H).

**<sup>13</sup>C NMR** (125.8 MHz, CDCl<sub>3</sub>): δ 204.7, 170.0, 141.9, 112.1, 58.3, 52.4, 35.8, 22.5, 19.7, 11.9, 11.7.

**IR** (KBr, cm<sup>-1</sup>): 1740, 1700, 1633.

**HRMS** (ESI) calcd for C<sub>11</sub>H<sub>17</sub>O<sub>3</sub> (M+H)<sup>+</sup>: 197.1172; Found: 197.1172.

(Ref: A. Faulkner, J. S. Scott and J. F. Bower, *J. Am. Chem. Soc.*, 2015, **137**, 7224.)

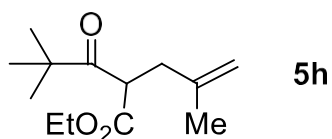

Compound **5h** was obtained as colourless oil in 46% yield.

**<sup>1</sup>H NMR** (500 MHz, CDCl<sub>3</sub>): δ 4.75 (s, 1H), 4.69 (s, 1H), 4.20-4.06 (m, 3H), 2.59 (dd, *J* = 14.6, 8.1 Hz, 1H), 2.40 (dd, *J* = 14.6, 6.3 Hz, 1H), 1.72 (s, 3H), 1.21 (t, *J* = 7.2 Hz, 3H), 1.15 (s, 9H).

**<sup>13</sup>C NMR** (125.8 MHz, CDCl<sub>3</sub>): δ 209.2, 169.2, 142.0, 112.5, 61.2, 51.2, 45.3, 37.4, 26.1, 22.5, 14.0.

**IR** (KBr,  $\text{cm}^{-1}$ ): 1743, 1707, 1478, 1198.

**HRMS** (ESI) calcd for  $\text{C}_{13}\text{H}_{23}\text{O}_3$  ( $\text{M}+\text{H}^+$ ): 227.1642; Found: 227.1647.

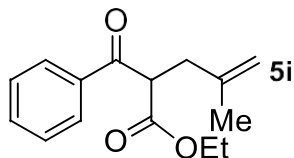

Compound **5i** was obtained as colourless oil in 75% yield.

**$^1\text{H}$  NMR** (500 MHz,  $\text{CDCl}_3$ ):  $\delta$  8.00 (dd,  $J = 8.6, 1.4$  Hz, 2H), 7.58 (tt,  $J = 7.4, 1.2$  Hz, 1H), 7.47 (dd,  $J = 8.6, 7.5$  Hz, 2H), 4.77 (s, 1H), 4.71 (s, 1H), 4.54 (dd,  $J = 8.0, 6.7$  Hz, 1H), 4.13 (dq,  $J = 7.2, 1.3$  Hz, 2H), 2.75 (dd,  $J = 15.2, 8.0$  Hz, 1H), 2.69 (dd,  $J = 15.2, 6.6$  Hz, 1H), 1.76 (s, 3H), 1.16 (t,  $J = 7.2$  Hz, 3H).

**$^{13}\text{C}$  NMR** (125.8 MHz,  $\text{CDCl}_3$ ):  $\delta$  194.5, 169.4, 142.0, 136.1, 133.4, 128.7, 128.6, 112.1, 61.4, 52.7, 36.4, 22.6, 13.9.

**IR** (KBr,  $\text{cm}^{-1}$ ): 1743, 1691, 1598, 1452.

**HRMS** (ESI) calcd for  $\text{C}_{15}\text{H}_{19}\text{O}_3$  ( $\text{M}+\text{H}^+$ ): 247.1329; Found: 247.1328.

(Ref: R. Queignec, B. Kirschleger, F. Lambert and M. Aboutaj, *Synth. Commun.*, 1988, **18**, 1213.)

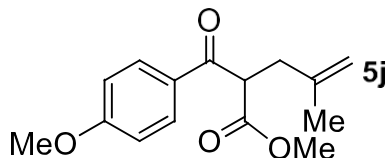

Compound **5j** was obtained as colourless oil in 79% yield.

**$^1\text{H}$  NMR** (500 MHz,  $\text{CDCl}_3$ ):  $\delta$  8.00 (d,  $J = 9.0$  Hz, 2H), 6.95 (d,  $J = 9.0$  Hz, 2H), 4.76 (s, 1H), 4.70 (s, 1H), 4.53 (dd,  $J = 7.9, 6.7$  Hz, 1H), 3.87 (s, 3H), 3.67 (s, 3H), 2.75 (dd,  $J = 15.2, 8.0$  Hz, 1H), 2.67 (dd,  $J = 15.2, 6.6$  Hz, 1H), 1.75 (s, 3H).

**$^{13}\text{C}$  NMR** (125.8 MHz,  $\text{CDCl}_3$ ):  $\delta$  192.8, 170.2, 163.9, 142.2, 131.0, 129.1, 114.0, 112.0, 55.5, 52.5, 52.2, 36.6, 22.7.

**IR** (KBr,  $\text{cm}^{-1}$ ): 1741, 1681, 1633.

**HRMS** (ESI) calcd for  $\text{C}_{15}\text{H}_{19}\text{O}_4$  ( $\text{M}+\text{H}^+$ ): 263.1278; Found: 263.1285.

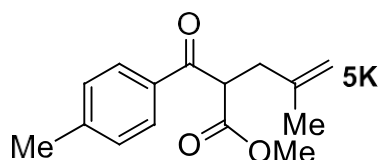

Compound **5k** was obtained as colourless oil in 55% yield.

**<sup>1</sup>H NMR** (500 MHz, CDCl<sub>3</sub>): δ 7.91 (d, *J* = 8.2 Hz, 2H), 7.28 (d, *J* = 8.2 Hz, 2H), 4.77 (s, 1H), 4.70 (s, 1H), 4.56 (dd, *J* = 7.8, 6.8 Hz, 1H), 3.67 (s, 3H), 2.75 (dd, *J* = 15.2, 8.0 Hz, 1H), 2.68 (dd, *J* = 15.2, 6.7 Hz, 1H), 2.42 (s, 3H), 1.76 (s, 3H).

**<sup>13</sup>C NMR** (125.8 MHz, CDCl<sub>3</sub>): δ 194.1, 170.1, 144.6, 142.1, 133.6, 129.5, 128.8, 112.1, 52.5, 52.4, 36.6, 22.7, 21.7.

**IR** (KBr, cm<sup>-1</sup>): 1737, 1683.

**HRMS** (ESI) calcd for C<sub>15</sub>H<sub>19</sub>O<sub>3</sub> (M+H)<sup>+</sup>: 247.1329; Found: 247.1325.

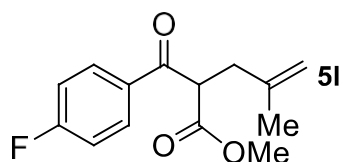

Compound **5l** was obtained as colourless oil in 63% yield.

**<sup>1</sup>H NMR** (500 MHz, CDCl<sub>3</sub>): δ 8.04 (dd, *J* = 8.9, 5.4 Hz, 2H), 7.14 (dd, *J* = 8.7, 8.6 Hz, 2H), 4.76 (s, 1H), 4.68 (s, 1H), 4.53 (dd, *J* = 7.7, 7.0 Hz, 1H), 3.67 (s, 3H), 2.75 (dd, *J* = 15.2, 7.8 Hz, 1H), 2.68 (dd, *J* = 15.2, 6.8 Hz, 1H), 1.74 (s, 3H).

**<sup>13</sup>C NMR** (125.8 MHz, CDCl<sub>3</sub>): δ 192.8, 169.7, 166.0 (d, *J* = 256.2 Hz), 141.9, 132.5 (d, *J* = 3.1 Hz), 131.3 (d, *J* = 9.6 Hz), 115.9 (d, *J* = 22.1 Hz), 112.2, 52.5, 52.4, 36.4, 22.5.

**IR** (KBr, cm<sup>-1</sup>): 1748, 1684, 1599, 1510, 1438.

**HRMS** (ESI) calcd for C<sub>14</sub>H<sub>16</sub>FO<sub>3</sub> (M+H)<sup>+</sup>: 251.1078; Found: 251.1083.

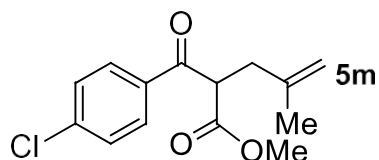

Compound **5m** was obtained as colourless oil in 68% yield.

**<sup>1</sup>H NMR** (500 MHz, CDCl<sub>3</sub>): δ 7.95 (d, *J* = 8.7 Hz, 2H), 7.45 (d, *J* = 8.7 Hz, 2H), 4.77 (s, 1H), 4.68 (s, 1H), 4.52 (dd, *J* = 7.6, 7.1 Hz, 1H), 3.67 (s, 3H), 2.75 (dd, *J* = 15.2, 7.8 Hz, 1H), 2.69 (dd, *J* = 15.2, 6.9 Hz, 1H), 1.75 (s, 3H).



**<sup>13</sup>C NMR** (125.8 MHz, CDCl<sub>3</sub>): δ 193.2, 169.6, 141.8, 140.1, 134.4, 130.0, 129.1, 112.3, 52.6, 52.5, 36.4, 22.6.

**IR** (KBr, cm<sup>-1</sup>): 1743, 1691, 1592, 1440.

**HRMS** (ESI) calcd for C<sub>14</sub>H<sub>16</sub>ClO<sub>3</sub> (M+H)<sup>+</sup>: 267.0782; Found: 267.0782.

(Ref: S. Chowdhury, S. Koley, T. Chanda and M. S. Singh, *Tetrahedron Lett.*, 2015, **56**, 5553.)

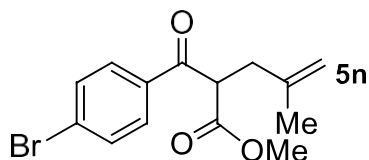

Compound **5n** was obtained as colourless oil in 77% yield.

**<sup>1</sup>H NMR** (500 MHz, CDCl<sub>3</sub>): δ 7.86 (ddd, *J* = 8.7, 2.4, 1.9 Hz, 2H), 7.62 (ddd, *J* = 8.7, 2.4, 1.9 Hz, 2H), 4.77 (s, 1H), 4.68 (s, 1H), 4.51 (dd, *J* = 7.5, 7.2 Hz, 1H), 3.67 (s, 3H), 2.74 (dd, *J* = 15.2, 7.7 Hz, 1H), 2.68 (dd, *J* = 15.2, 7.0 Hz, 1H), 1.74 (s, 3H).

**<sup>13</sup>C NMR** (125.8 MHz, CDCl<sub>3</sub>): δ 193.5, 169.7, 141.8, 134.8, 132.1, 130.1, 128.9, 112.3, 52.6, 52.5, 36.4, 22.6.

**IR** (KBr, cm<sup>-1</sup>): 1744, 1689, 1591.

**HRMS** (ESI) calcd for C<sub>14</sub>H<sub>16</sub>BrO<sub>3</sub> (M+H)<sup>+</sup>: 311.0277; Found: 311.0277.

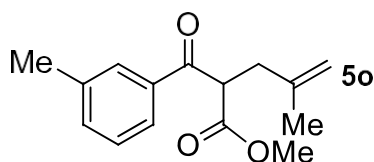

Compound **5o** was obtained as colourless oil in 83% yield.

**<sup>1</sup>H NMR** (500 MHz, CDCl<sub>3</sub>): δ 7.81 (s, 1H), 7.80 (d, *J* = 8.5 Hz, 1H), 7.40 (d, *J* = 7.5 Hz, 1H), 7.37 (dd, *J* = 7.5, 7.4 Hz, 1H), 4.77 (s, 1H), 4.71 (s, 1H), 4.57 (dd, *J* = 7.7, 6.9 Hz, 1H), 3.68 (s, 3H), 2.75 (dd, *J* = 15.1, 7.9 Hz, 1H), 2.69 (dd, *J* = 15.1, 6.7 Hz, 1H), 2.42 (s, 3H), 1.76 (s, 3H).

**<sup>13</sup>C NMR** (125.8 MHz, CDCl<sub>3</sub>): δ 194.7, 170.0, 142.1, 138.7, 136.1, 134.4, 129.1, 128.6, 125.9, 112.2, 52.5, 36.6 (2C), 22.6, 21.4.

**IR** (KBr, cm<sup>-1</sup>): 1743, 1686, 1651, 1433, 1152.

**HRMS** (ESI) calcd for C<sub>15</sub>H<sub>19</sub>O<sub>3</sub> (M+H)<sup>+</sup>: 247.1329; Found: 247.1332.

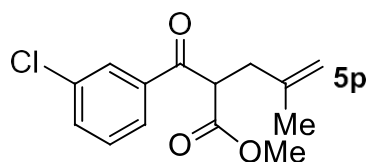

Compound **5p** was obtained as colourless oil in 64% yield.

**<sup>1</sup>H NMR** (500 MHz, CDCl<sub>3</sub>): δ 7.96 (dd, *J* = 1.8, 1.8 Hz, 1H), 7.87 (d, *J* = 7.8 Hz, 1H), 7.55 (dd, *J* = 7.9, 1.5 Hz, 1H), 7.42 (dd, *J* = 7.9, 7.9 Hz, 1H), 4.77 (s, 1H), 4.69 (s, 1H), 4.52 (dd, *J* = 7.4, 7.3 Hz, 1H), 3.68 (s, 3H), 2.75 (dd, *J* = 15.1, 7.7 Hz, 1H), 2.69 (dd, *J* = 15.1, 7.0 Hz, 1H), 1.75 (s, 3H).

**<sup>13</sup>C NMR** (125.8 MHz, CDCl<sub>3</sub>): δ 193.3, 169.6, 141.8, 137.7, 135.2, 133.5, 130.1, 128.6, 126.6, 112.4, 52.62, 52.60, 36.4, 22.6.

**IR** (KBr, cm<sup>-1</sup>): 1743, 1695, 1574, 1229.

**HRMS** (ESI) calcd for C<sub>14</sub>H<sub>16</sub>ClO<sub>3</sub> (M+H)<sup>+</sup>: 267.0782; Found: 267.0788.

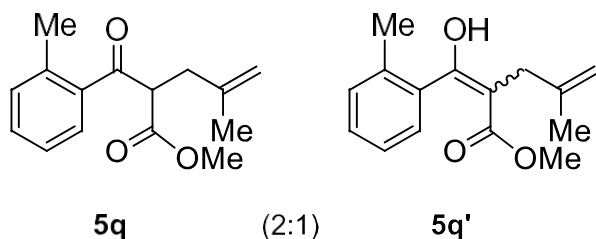

Compound **5q** and **5q'** was obtained as colourless oil in 49% yield.

**<sup>1</sup>H NMR** (500 MHz, CDCl<sub>3</sub>): **5q/5q'**, δ 12.90 (s, 0.5H), 7.70 (dd, *J* = 7.8, 0.9 Hz, 1H), 7.38 (ddd, *J* = 7.5, 7.5, 1.3 Hz, 1H), 7.30-7.23 (m, 2.5Hs), 7.21 (dd, *J* = 7.7, 1.5 Hz, 0.5+0.5 H), 7.16 (dd, *J* = 7.6, 7.1 Hz, 0.5H), 4.77 (s, 1H), 4.71 (s, 1H), 4.69-4.66 (m, 0.5H), 4.54-4.51 (m, 0.5H), 4.47 (dd, *J* = 7.5, 7.3 Hz, 1H), 3.80 (s, 1.5H), 3.67 (s, 3H), 2.72-2.64 (m, 3Hs), 2.47 (s, 3H), 2.32 (s, 1.5H), 1.74 (s, 3H), 1.58 (s, 1.5H).

**<sup>13</sup>C NMR** (125.8 MHz, CDCl<sub>3</sub>): **5q/5q'**, δ 198.0, 174.0, 172.6, 170.0, 144.5, 141.9, 138.9, 136.9, 135.7, 134.3, 132.0, 131.6, 130.2, 129.1, 128.3, 127.7, 125.6, 125.2, 112.2, 109.5, 99.9, 54.9, 52.3, 51.6, 36.5, 34.1, 22.8, 22.4, 20.9, 19.2.

**IR** (KBr, cm<sup>-1</sup>): 3400, 1748, 1693, 1441, 1262.

**HRMS** (ESI) calcd for C<sub>15</sub>H<sub>19</sub>O<sub>3</sub> (M+H)<sup>+</sup>: 247.1329; Found: 247.1329.

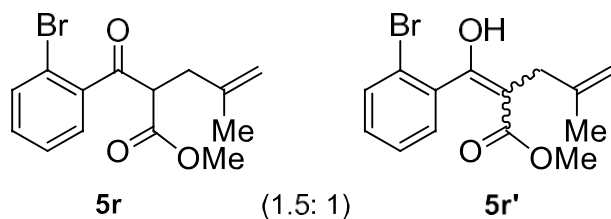

Compound **5r** and **5r'** was obtained as colourless oil in 58% yield.

**<sup>1</sup>H NMR** (500 MHz, CDCl<sub>3</sub>): **5r/5r'**,  $\delta$  12.82 (s, 0.67H), 7.64-7.59 (m, 1.67Hs), 7.43 (dd,  $J$  = 7.6, 1.8 Hz, 0.67H), 7.38 (ddd,  $J$  = 7.6, 7.4, 1.2 Hz, 0.67H), 7.35-7.28 (m, 2.67Hs), 7.27-7.22 (m, 1H), 4.79 (s, 0.67H), 4.74 (s, 0.67H), 4.66 (dd,  $J$  = 1.5, 1.5 Hz, 1H), 4.54-4.51 (m, 1H), 4.48 (dd,  $J$  = 9.0, 5.9 Hz, 0.67H), 3.82 (s, 3H), 3.67 (s, 2H), 2.95-2.75 (m, 1H), 2.73 (dd,  $J$  = 15.0, 9.1 Hz, 1H), 2.65 (dd,  $J$  = 15.0, 5.9 Hz, 1H), 2.60-2.40 (m, 0.67H), 1.75 (s, 2H), 1.58 (s, 3H).

**<sup>13</sup>C NMR** (125.8 MHz, CDCl<sub>3</sub>): **5r/5r'**,  $\delta$  197.9, 173.8, 170.4, 169.3, 144.2, 141.6, 140.2, 135.8, 133.9, 132.9, 132.0, 130.6, 129.7, 128.9, 127.4, 127.0, 121.6, 119.2, 112.6, 109.9, 100.7, 56.4, 52.4, 51.9, 36.1, 34.1, 22.8, 22.5.

**IR** (KBr, cm<sup>-1</sup>): 3400, 1743, 1707, 1652, 1443, 1254.

**HRMS** (ESI) calcd for C<sub>14</sub>H<sub>16</sub>BrO<sub>3</sub> (M+H)<sup>+</sup>: 311.0277; Found: 311.0280.

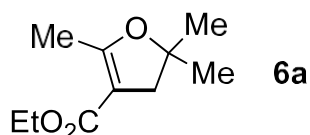

Compound **6a** was obtained as colourless oil.

**<sup>1</sup>H NMR** (500 MHz, CDCl<sub>3</sub>):  $\delta$  4.15 (q,  $J$  = 7.1 Hz, 2H), 2.67 (q,  $J$  = 1.6 Hz, 2H), 2.16 (t,  $J$  = 1.6 Hz, 3H), 1.38 (s, 6H), 1.27 (t,  $J$  = 7.1 Hz, 3H).

**<sup>13</sup>C NMR** (125.8 MHz, CDCl<sub>3</sub>):  $\delta$  166.7, 166.6, 101.0, 86.0, 59.3, 42.6, 28.3, 14.5, 14.4.

**IR** (KBr, cm<sup>-1</sup>): 1700, 1652, 912.

**HRMS** (ESI) calcd for C<sub>10</sub>H<sub>17</sub>O<sub>3</sub> (M+H)<sup>+</sup>: 185.1172; Found: 185.1175.

(Ref: T. Sakai, K. Miyata, S. Tsuboi and M. Utaka, *Bull. Chem. Soc. Jpn.*, 1989, **62**, 4072.)

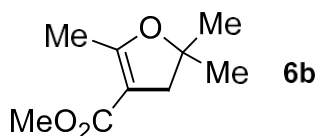

Compound **6b** was obtained as colourless oil.

**<sup>1</sup>H NMR** (500 MHz, CDCl<sub>3</sub>): δ 3.69 (s, 3H), 2.67 (q, *J* = 1.6 Hz, 2H), 2.16 (t, *J* = 1.6 Hz, 3H), 1.37 (s, 6H).

**<sup>13</sup>C NMR** (125.8 MHz, CDCl<sub>3</sub>): δ 167.0, 166.9, 100.7, 86.1, 50.7, 42.6, 28.2, 14.4.

**IR** (KBr, cm<sup>-1</sup>): 1688, 1668, 910.

**HRMS** (ESI) calcd for C<sub>9</sub>H<sub>15</sub>O<sub>3</sub> (M+H)<sup>+</sup>: 171.1016; Found: 171.1021.

(Ref: V. Roland, K. Norbert De, C. Dirk, B. Laurent De and S. Niceas, *Tetrahedron*, 1982, **38**, 3649.)

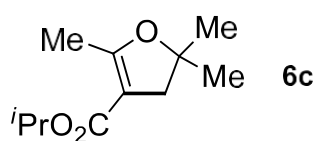

Compound **6c** was obtained as colourless oil.

**<sup>1</sup>H NMR** (500 MHz, CDCl<sub>3</sub>): δ 5.04 (sept, *J* = 6.3 Hz, 1H), 2.66 (q, *J* = 1.5 Hz, 2H), 2.16 (t, *J* = 1.5 Hz, 3H), 1.37 (s, 6H), 1.25 (d, *J* = 6.3 Hz, 6H).

**<sup>13</sup>C NMR** (125.8 MHz, CDCl<sub>3</sub>): δ 166.3, 166.2, 101.4, 85.8, 66.4, 42.7, 28.3, 22.2, 14.5.

**IR** (KBr, cm<sup>-1</sup>): 1743, 1691, 1646, 1276, 1263, 1142, 1110, 767.

**HRMS** (ESI) calcd for C<sub>11</sub>H<sub>19</sub>O<sub>3</sub> (M+H)<sup>+</sup>: 199.1329; Found: 199.1330.

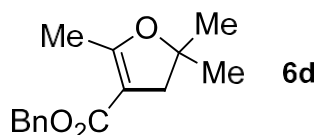

Compound **6d** was obtained as colourless oil.

**<sup>1</sup>H NMR** (500 MHz, CDCl<sub>3</sub>): δ 7.40-7.34 (m, 4H), 7.34-7.27 (m, 1H), 5.16 (s, 2H), 2.71 (q, *J* = 1.5 Hz, 2H), 2.18 (t, *J* = 1.5 Hz, 3H), 1.38 (s, 6H).

**<sup>13</sup>C NMR** (125.8 MHz, CDCl<sub>3</sub>): δ 167.4, 166.2, 136.8, 128.5, 127.9, 127.8, 100.7, 86.3, 65.2, 42.5, 28.3, 14.5.

**IR** (KBr, cm<sup>-1</sup>): 1716, 1633, 1273, 1264.

**HRMS** (ESI) calcd for C<sub>15</sub>H<sub>19</sub>O<sub>3</sub> (M+H)<sup>+</sup>: 247.1329; Found: 247.1335.

(Ref: S. Kitagaki, D. Shibata and C. Mukai, *Tetrahedron Lett.*, 2007, **48**, 1735.)

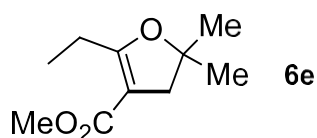

Compound **6e** was obtained as colourless oil.

**<sup>1</sup>H NMR** (500 MHz, CDCl<sub>3</sub>): δ 3.69 (s, 3H), 2.66 (s, 2H), 2.61 (q, *J* = 7.6 Hz, 2H), 1.37 (s, 6H), 1.10 (t, *J* = 7.6 Hz, 3H).

**<sup>13</sup>C NMR** (125.8 MHz, CDCl<sub>3</sub>): δ 171.9, 166.8, 99.6, 85.9, 50.7, 42.6, 28.1, 21.4, 11.1.

**IR** (KBr, cm<sup>-1</sup>): 1637, 1278, 1266, 1079, 762, 753.

**HRMS** (ESI) calcd for C<sub>10</sub>H<sub>17</sub>O<sub>3</sub> (M+H)<sup>+</sup>: 185.1172; Found: 185.1173.

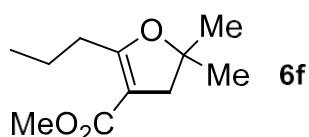

Compound **6f** was obtained as colourless oil.

**<sup>1</sup>H NMR** (500 MHz, CDCl<sub>3</sub>): δ 3.69 (s, 3H), 2.67 (s, 2H), 2.59 (t, *J* = 7.5 Hz, 2H), 1.60-1.54 (m, 2H), 1.37 (s, 6H), 0.94 (t, *J* = 7.4 Hz, 3H).

**<sup>13</sup>C NMR** (125.8 MHz, CDCl<sub>3</sub>): δ 170.7, 166.8, 100.4, 85.9, 50.6, 42.6, 29.7, 28.2, 20.2, 13.7.

**IR** (KBr, cm<sup>-1</sup>): 1653, 1643, 1278, 1262, 917.

**HRMS** (ESI) calcd for C<sub>11</sub>H<sub>19</sub>O<sub>3</sub> (M+H)<sup>+</sup>: 199.1329; Found: 199.1329.

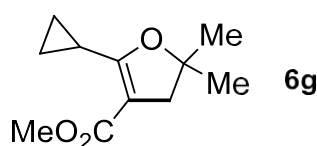

Compound **6g** was obtained as colourless oil.

**<sup>1</sup>H NMR** (500 MHz, CDCl<sub>3</sub>): δ 3.71 (s, 3H), 2.73-2.67 (m, 1H), 2.67 (s, 2H), 1.30 (s, 6H), 0.96-0.91 (m, 2H), 0.85-0.80 (m, 2H).

**<sup>13</sup>C NMR** (125.8 MHz, CDCl<sub>3</sub>): δ 170.7, 167.4, 100.0, 85.8, 50.6, 42.9, 27.9, 9.2, 7.2.

**IR** (KBr, cm<sup>-1</sup>): 1749, 1630, 1413, 1385, 1098.

**HRMS** (ESI) calcd for C<sub>11</sub>H<sub>17</sub>O<sub>3</sub> (M+H)<sup>+</sup>: 197.1172; Found: 197.1172.

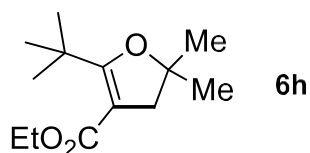

Compound **6h** was obtained as colourless oil.

**<sup>1</sup>H NMR** (500 MHz, CDCl<sub>3</sub>): δ 4.11 (q, *J* = 7.2 Hz, 2H), 2.70 (s, 2H), 1.33 (s, 6H), 1.27 (s, 9H), 1.26 (t, *J* = 7.2 Hz, 3H).

**<sup>13</sup>C NMR** (125.8 MHz, CDCl<sub>3</sub>): δ 176.2, 165.8, 98.6, 84.0, 59.2, 44.6, 27.9, 27.5, 26.4, 14.4.

**IR** (KBr, cm<sup>-1</sup>): 1735, 1644, 1264, 1276, 767, 751.

**HRMS** (ESI) calcd for C<sub>13</sub>H<sub>23</sub>O<sub>3</sub> (M+H)<sup>+</sup>: 227.1642; Found: 227.1646.

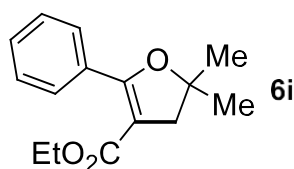

Compound **6i** was obtained as colourless oil.

**<sup>1</sup>H NMR** (500 MHz, CDCl<sub>3</sub>): δ 7.74 (dd, *J* = 7.6, 1.5 Hz, 2H), 7.43-7.33 (m, 3H), 4.12 (q, *J* = 7.2 Hz, 2H), 2.92 (s, 2H), 1.49 (s, 6H), 1.20 (t, *J* = 7.2 Hz, 3H).

**<sup>13</sup>C NMR** (125.8 MHz, CDCl<sub>3</sub>): δ 165.7, 164.0, 130.6, 130.1, 129.2, 127.5, 101.6, 85.5, 59.6, 44.3, 28.2, 14.2.

**IR** (KBr, cm<sup>-1</sup>): 1642, 1628, 1492, 1262.

**HRMS** (ESI) calcd for C<sub>15</sub>H<sub>19</sub>O<sub>3</sub> (M+H)<sup>+</sup>: 247.1329; Found: 247.1334.

(Ref: T. Sakai, K. Miyata, S. Tsuboi and M. Utaka, *Bull. Chem. Soc. Jpn.*, 1989, **62**, 4072.)

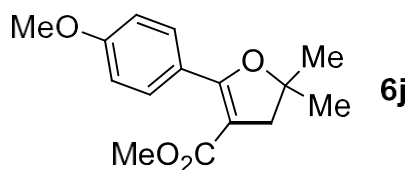

Compound **6j** was obtained as colourless oil.

**<sup>1</sup>H NMR** (500 MHz, CDCl<sub>3</sub>): δ 7.78 (dt, *J* = 9.0, 2.8 Hz, 2H), 6.89 (dt, *J* = 9.0, 2.8 Hz, 2H), 3.83 (s, 3H), 3.67 (s, 3H), 2.90 (s, 2H), 1.47 (s, 6H).

**<sup>13</sup>C NMR** (125.8 MHz, CDCl<sub>3</sub>): δ 166.2, 164.2, 161.1, 131.0, 122.8, 113.0, 99.9, 85.1, 55.3, 50.8, 44.3, 28.1.

**IR** (KBr, cm<sup>-1</sup>): 1702, 1688, 1609, 1512, 1369, 1254.

**HRMS** (ESI) calcd for  $C_{15}H_{19}O_4$  ( $M+H$ )<sup>+</sup>: 263.1278; Found: 263.1274.

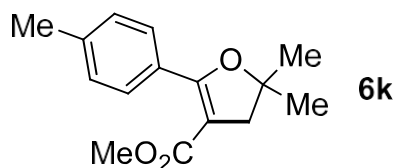

Compound **6k** was obtained as colourless oil.

**<sup>1</sup>H NMR** (500 MHz,  $CDCl_3$ ):  $\delta$  7.66 (d,  $J$  = 8.2 Hz, 2H), 7.18 (d,  $J$  = 8.2 Hz, 2H), 3.66 (s, 3H), 2.91 (s, 2H), 2.37 (s, 3H), 1.48 (s, 6H).

**<sup>13</sup>C NMR** (125.8 MHz,  $CDCl_3$ ):  $\delta$  166.1, 164.6, 140.4, 129.1, 128.3, 127.6, 100.6, 85.4, 50.8, 44.2, 28.1, 21.5.

**IR** (KBr,  $cm^{-1}$ ): 1713, 1629.

**HRMS** (ESI) calcd for  $C_{15}H_{19}O_3$  ( $M+H$ )<sup>+</sup>: 247.1329; Found: 247.1329.

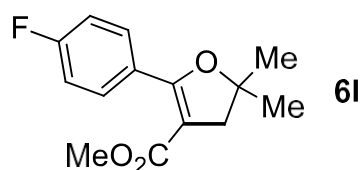

Compound **6l** was obtained as colourless oil.

**<sup>1</sup>H NMR** (500 MHz,  $CDCl_3$ ):  $\delta$  7.84-7.77 (m, 2H), 7.10-7.03 (m, 2H), 3.66 (s, 3H), 2.91 (s, 2H), 1.48 (s, 6H).

**<sup>13</sup>C NMR** (125.8 MHz,  $CDCl_3$ ):  $\delta$  166.0, 163.7 (d,  $J$  = 250.5 Hz), 163.2, 131.5 (d,  $J$  = 8.5 Hz), 126.5 (d,  $J$  = 3.1 Hz), 114.7 (d,  $J$  = 21.7 Hz), 101.1, 85.6, 50.9, 44.2, 28.1.

**IR** (KBr,  $cm^{-1}$ ): 1663, 1633, 1504, 1273, 1084.

**HRMS** (ESI) calcd for  $C_{14}H_{16}FO_3$  ( $M+H$ )<sup>+</sup>: 251.1078; Found: 251.1078.

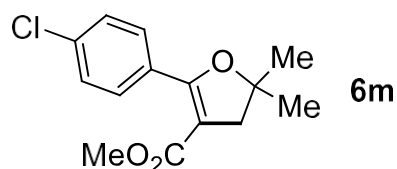

Compound **6m** was obtained as colourless oil.

**<sup>1</sup>H NMR** (500 MHz, CDCl<sub>3</sub>): δ 7.73 (d, *J* = 8.6 Hz, 2H), 7.35 (d, *J* = 8.6 Hz, 2H), 3.66 (s, 3H), 2.91 (s, 2H), 1.48 (s, 6H).

**<sup>13</sup>C NMR** (125.8 MHz, CDCl<sub>3</sub>): δ 165.9, 163.0, 136.2, 130.7, 128.8, 127.9, 101.7, 85.8, 51.0, 44.2, 28.1.

**IR** (KBr, cm<sup>-1</sup>): 1703, 1693, 1375.

**HRMS** (ESI) calcd for C<sub>14</sub>H<sub>16</sub>ClO<sub>3</sub> (M+H)<sup>+</sup>: 267.0782; Found: 267.0786.

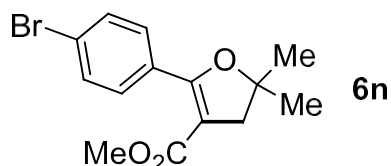

Compound **6n** was obtained as colourless oil.

**<sup>1</sup>H NMR** (500 MHz, CDCl<sub>3</sub>): δ 7.66 (ddd, *J* = 8.6, 2.4, 1.9 Hz, 2H), 7.51 (ddd, *J* = 8.6, 2.3, 1.9 Hz, 2H), 3.66 (s, 3H), 2.91 (s, 2H), 1.48 (s, 6H).

**<sup>13</sup>C NMR** (125.8 MHz, CDCl<sub>3</sub>): δ 165.9, 163.0, 130.9, 130.8, 129.3, 124.6, 101.8, 85.8, 51.0, 44.2, 28.1.

**IR** (KBr, cm<sup>-1</sup>): 1705, 1663, 1632.

**HRMS** (ESI) calcd for C<sub>14</sub>H<sub>16</sub>BrO<sub>3</sub> (M+H)<sup>+</sup>: 311.0277; Found: 311.0281.

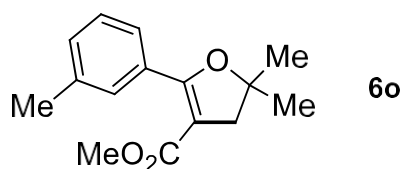

Compound **6o** was obtained as colourless oil.

**<sup>1</sup>H NMR** (500 MHz, CDCl<sub>3</sub>): δ 7.55 (d, *J* = 7.6 Hz, 1H), 7.52 (s, 1H), 7.29-7.24 (m, 1H), 7.21 (d, *J* = 7.4 Hz, 1H), 3.65 (d, *J* = 0.6 Hz, 3H), 2.91 (s, 2H), 2.37 (s, 3H), 1.49 (s, 6H).

**<sup>13</sup>C NMR** (125.8 MHz, CDCl<sub>3</sub>): δ 166.1, 164.6, 137.3, 131.0, 130.4, 129.5, 127.5, 126.5, 101.2, 85.6, 50.9, 44.2, 28.1, 21.4.

**IR** (KBr, cm<sup>-1</sup>): 1707, 1688, 1629, 1598, 1269, 1128.

**HRMS** (ESI) calcd for C<sub>15</sub>H<sub>19</sub>O<sub>3</sub> (M+H)<sup>+</sup>: 247.1329; Found: 247.1329.



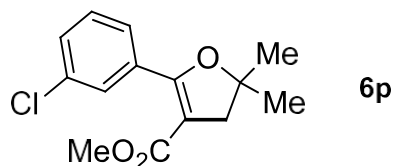

Compound **6p** was obtained as colourless oil.

**<sup>1</sup>H NMR** (500 MHz, CDCl<sub>3</sub>): δ 7.74 (dd, *J* = 1.7, 1.6 Hz, 1H), 7.69 (d, *J* = 7.7 Hz, 1H), 7.39-7.35 (m, 1H), 7.31 (dd, *J* = 7.9, 7.8 Hz, 1H), 3.67 (s, 3H), 2.92 (s, 2H), 1.49 (s, 6H).

**<sup>13</sup>C NMR** (125.8 MHz, CDCl<sub>3</sub>): δ 165.7, 162.4, 133.6, 132.2, 130.2, 129.2, 128.9, 127.5, 102.3, 85.9, 51.0, 44.2, 28.1.

**IR** (KBr, cm<sup>-1</sup>): 1705, 1626, 1595, 1566, 1262.

**HRMS** (ESI) calcd for C<sub>14</sub>H<sub>16</sub>ClO<sub>3</sub> (M+H)<sup>+</sup>: 267.0782; Found: 267.0780.

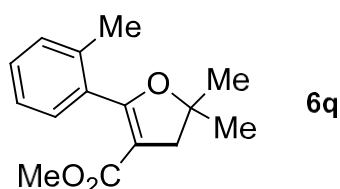

Compound **6q** was obtained as colourless oil.

**<sup>1</sup>H NMR** (500 MHz, CDCl<sub>3</sub>): δ 7.31-7.26 (m, 2H), 7.23-7.17 (m, 2H), 3.55 (s, 3H), 2.91 (s, 2H), 2.32 (s, 3H), 1.51 (s, 6H).

**<sup>13</sup>C NMR** (125.8 MHz, CDCl<sub>3</sub>): δ 165.8, 165.6, 136.6, 131.0, 129.9, 129.4, 129.2, 125.2, 103.1, 86.8, 50.8, 43.1, 28.3, 19.4.

**IR** (KBr, cm<sup>-1</sup>): 1693, 1646, 1364, 1280.

**HRMS** (ESI) calcd for C<sub>15</sub>H<sub>19</sub>O<sub>3</sub> (M+H)<sup>+</sup>: 247.1329; Found: 247.1334.

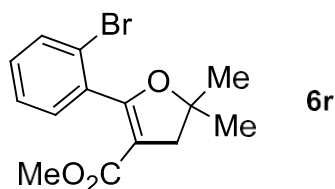

Compound **6r** was obtained as colourless oil.

**<sup>1</sup>H NMR** (500 MHz, CDCl<sub>3</sub>): δ 7.59 (d, *J* = 8.1 Hz, 1H), 7.35-7.31 (m, 2H), 7.26-7.22 (m, 1H), 3.55 (s, 3H), 2.91 (s, 2H), 1.54 (s, 6H).

**$^{13}\text{C}$  NMR** (125.8 MHz,  $\text{CDCl}_3$ ):  $\delta$  165.5, 163.5, 133.0, 132.7, 130.7 (2C), 126.9, 122.3, 104.3, 87.8, 50.9, 43.0, 28.3.

**IR** (KBr,  $\text{cm}^{-1}$ ): 1695, 1651.

**HRMS** (ESI) calcd for  $\text{C}_{14}\text{H}_{16}\text{BrO}_3$  ( $\text{M}+\text{H}$ ) $^+$ : 311.0277; Found: 311.0277.

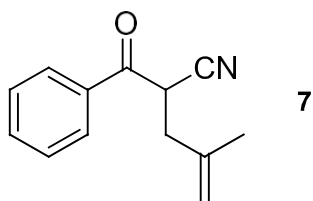

Compound **7** was obtained as colourless oil.

**$^1\text{H}$  NMR** (500 MHz,  $\text{CDCl}_3$ ):  $\delta$  7.98 (dd,  $J$  = 8.6, 1.3 Hz, 2H), 7.66 (ddd,  $J$  = 7.5, 7.5, 1.2 Hz, 1H), 7.54 (dd,  $J$  = 8.1, 7.6 Hz, 2H), 4.97 (s, 1H), 4.89 (s, 1H), 4.48 (dd,  $J$  = 9.2, 5.7 Hz, 1H), 2.74 (dd,  $J$  = 14.8, 5.7 Hz, 1H), 2.68 (dd,  $J$  = 14.8, 9.1 Hz, 1H), 1.84 (s, 3H).

**$^{13}\text{C}$  NMR** (125.8 MHz,  $\text{CDCl}_3$ ):  $\delta$  190.2, 139.6, 134.5, 134.0, 129.1, 128.8, 117.0, 114.6, 38.4, 37.3, 22.3.

**IR** (KBr,  $\text{cm}^{-1}$ ): 1696, 1658, 1455, 1273, 1260, 753.

**HRMS** (ESI) calcd for  $\text{C}_{13}\text{H}_{14}\text{NO}$  ( $\text{M}+\text{H}$ ) $^+$ : 200.1070; Found: 200.1073.

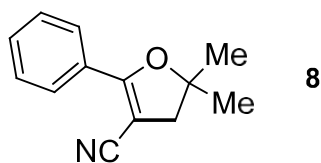

Compound **8** was obtained as colourless oil.

**$^1\text{H}$  NMR** (500 MHz,  $\text{CDCl}_3$ ):  $\delta$  7.93 (dd,  $J$  = 8.2, 1.4 Hz, 2H), 7.48-7.40 (m, 3H), 2.88 (s, 2H), 1.51 (s, 6H).

**$^{13}\text{C}$  NMR** (125.8 MHz,  $\text{CDCl}_3$ ):  $\delta$  165.8, 131.1, 128.6 (2C), 127.1, 118.2, 87.6, 78.2, 44.3, 28.0.

**IR** (KBr,  $\text{cm}^{-1}$ ): 1648, 1630, 1422, 1098.

**HRMS** (ESI) calcd for  $\text{C}_{13}\text{H}_{14}\text{NO}$  ( $\text{M}+\text{H}$ ) $^+$ : 200.1070; Found: 200.1070.

## 5- Copies of NMR spectra

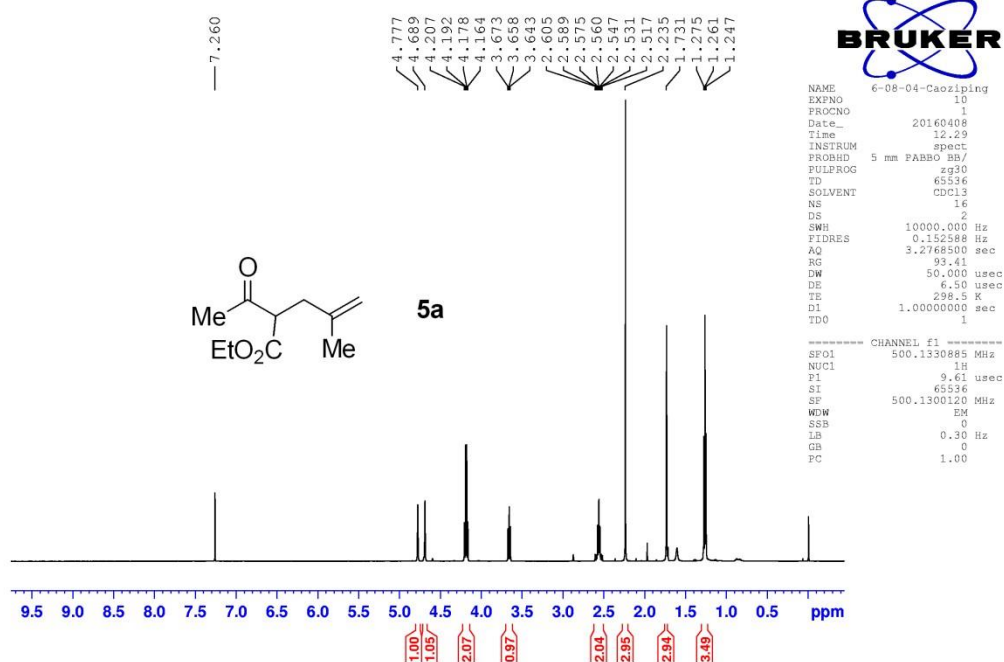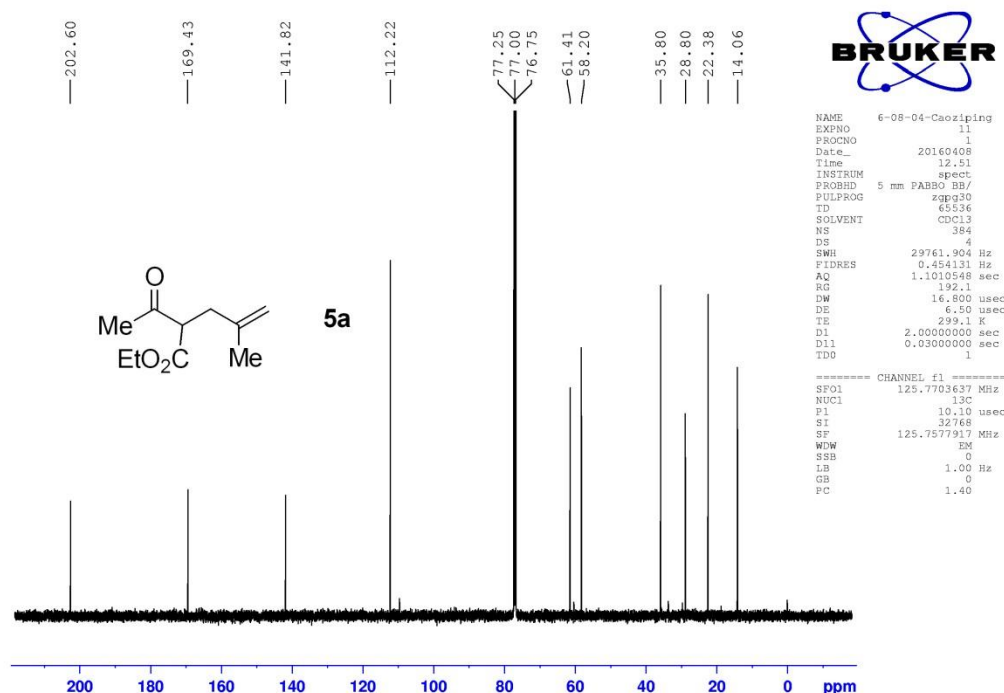

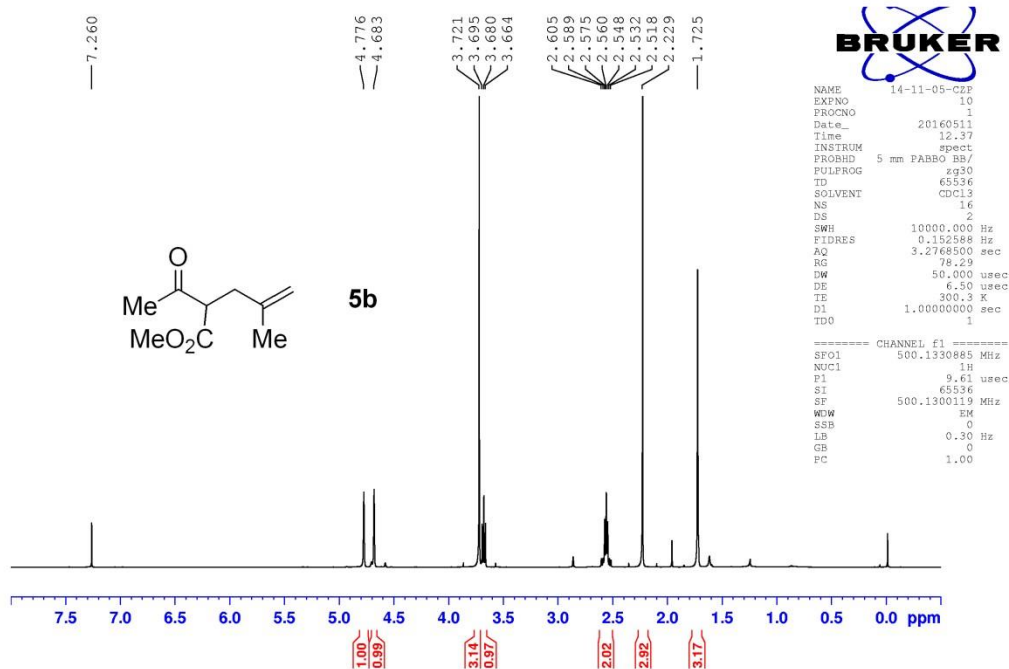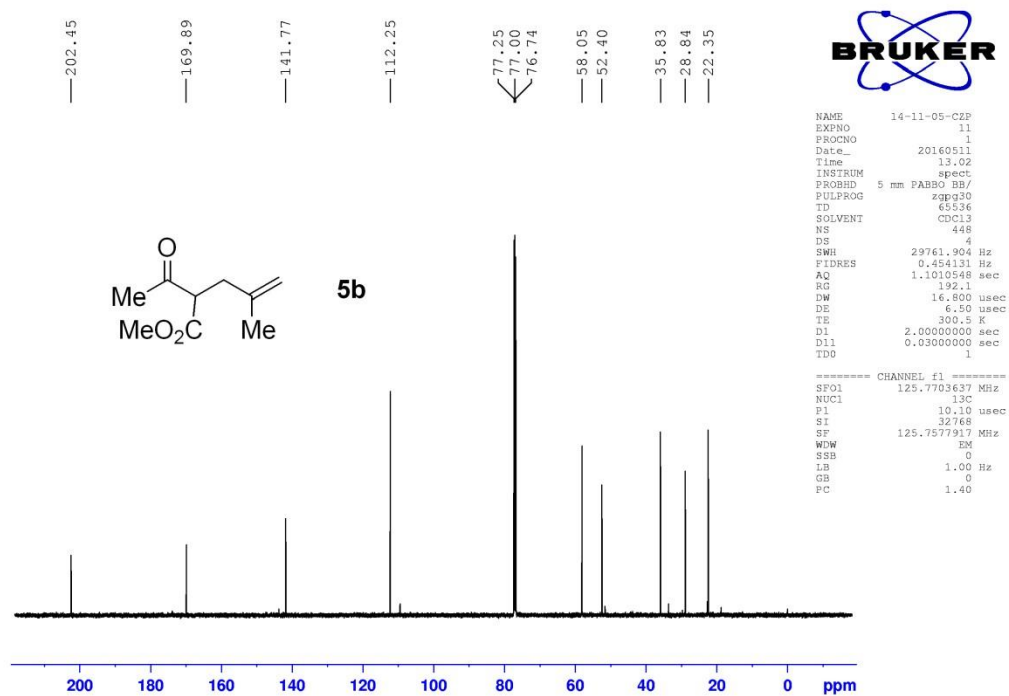

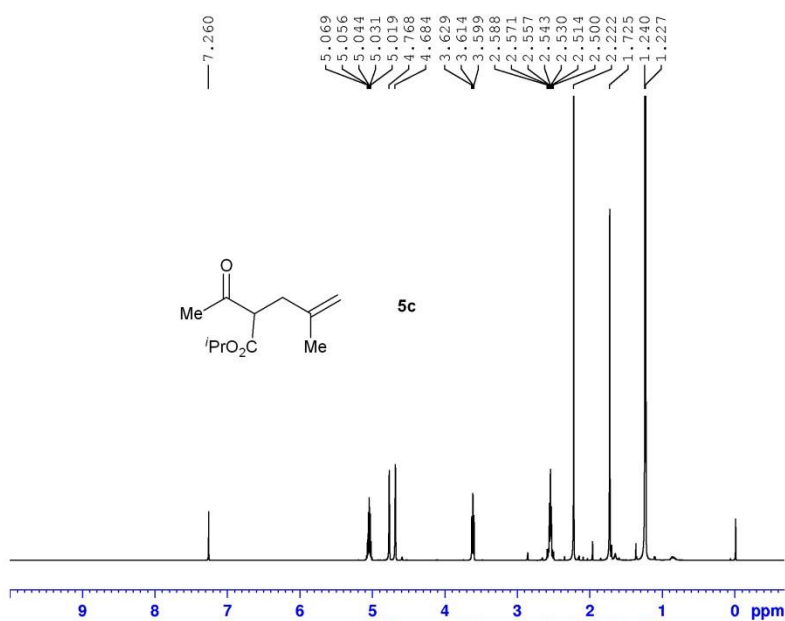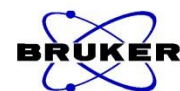

```

NAME      14-Mar31-2016
EXPNO     10
PROCNO    1
Date_     20160401
Time      8.36
INSTRUM   spect
PROBHD    5 mm PABBO BB/
PULPROG   zg30
TD         65536
SOLVENT   CDCl3
NS         16
DS         2
SWH        10000.000 Hz
FIDRES     0.152588 Hz
AQ         3.2768500 sec
RG         58.9
DW         50.000 usec
DE         6.50 usec
TE         298.0 K
D1         1.00000000 sec
D11        1
TDO        1
  
```

```

===== CHANNEL f1 =====
SF01      500.1330885 MHz
NUC1       1H
P1         9.61 usec
SI         65536
SF         500.1330121 MHz
WDW        EM
SSB        0
LB         0.30 Hz
GB         0
PC         1.00
  
```

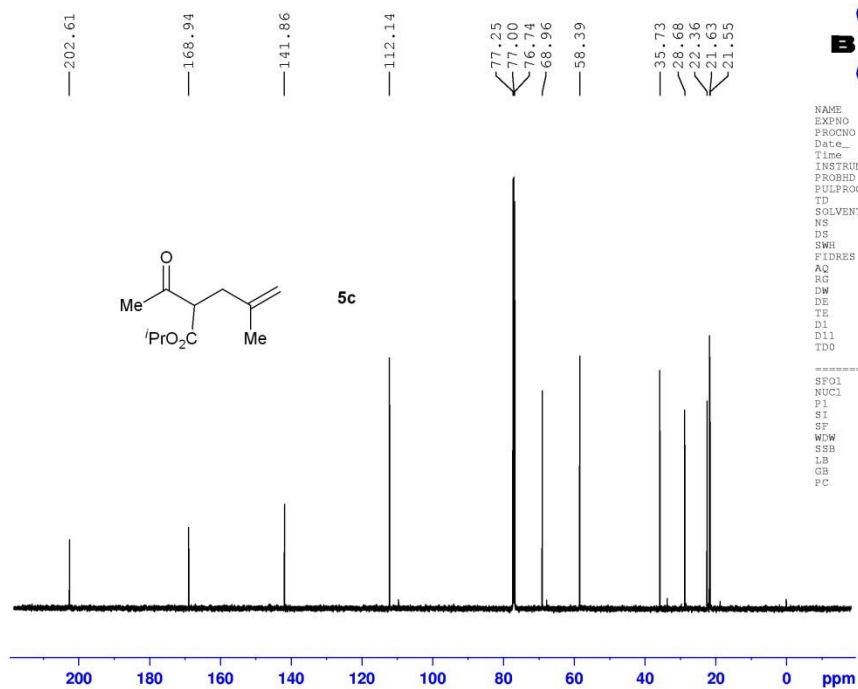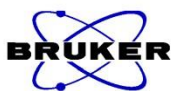

```

NAME      14-Mar31-2016
EXPNO     11
PROCNO    1
Date_     20160401
Time      8.57
INSTRUM   spect
PROBHD    5 mm PABBO BB/
PULPROG   zgpg30
TD         65536
SOLVENT   CDCl3
NS         384
DS         4
SWH        29761.904 Hz
FIDRES     0.454131 Hz
AQ         1.1010548 sec
RG         192.1
DW         16.800 usec
DE         6.50 usec
TE         298.0 K
D1         2.00000000 sec
D11        0.03000000 sec
TDO        1
  
```

```

===== CHANNEL f1 =====
SF01      125.7703637 MHz
NUC1       13C
P1        10.10 usec
SI        32768
SF        125.7577926 MHz
WDW        EM
SSB        0
LB         1.00 Hz
GB         0
PC         1.40
  
```

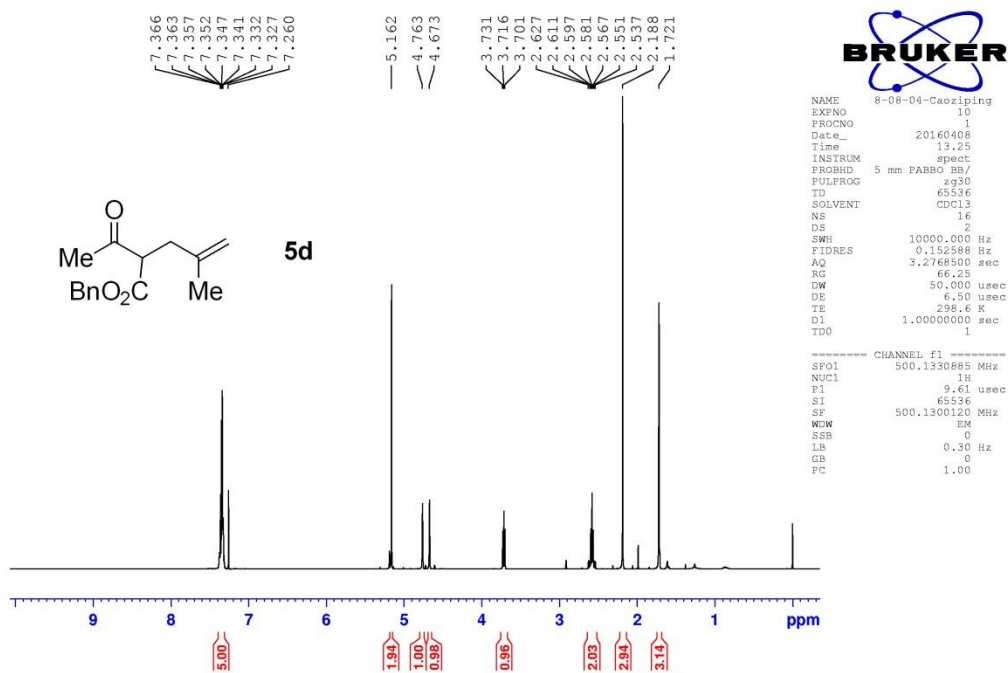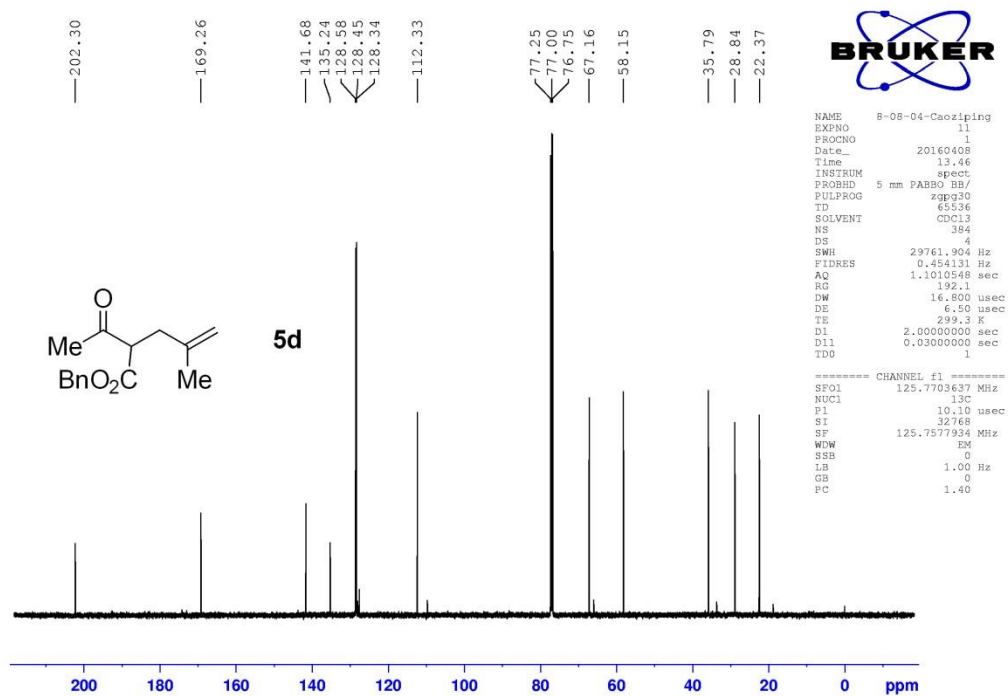

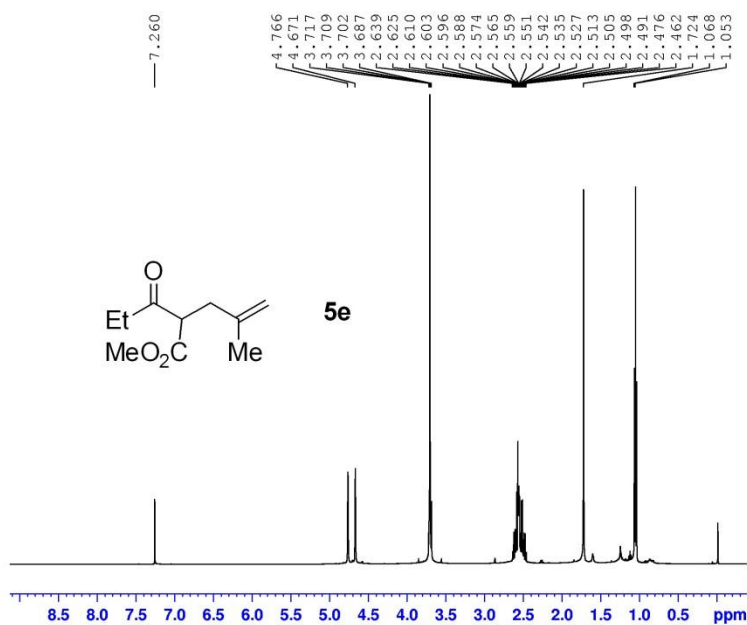

**BRUKER**

NAME 17-23-03-Caoziping  
 EXPNO 10  
 PROCNO 1  
 Date\_ 20160323  
 Time 9.51  
 INSTRUM spect  
 PROBHD 5 mm PABBO BB/  
 PULPROG zg30  
 TD 65536  
 SOLVENT CDCl<sub>3</sub>  
 NS 16  
 DS 2  
 SWH 10000.000 Hz  
 FIDRES 0.152588 Hz  
 AQ 3.2768500 sec  
 RG 66.25  
 DW 50.000 usec  
 DE 6.50 usec  
 TE 297.4 K  
 D1 1.0000000 sec  
 TD0 1

===== CHANNEL f1 =====  
 SF01 500.1330885 MHz  
 NUC1 1H  
 P1 9.90 usec  
 SI 65536  
 SF 500.1300119 MHz  
 WDW EM  
 SSB 0  
 LB 0.30 Hz  
 GB 0  
 PC 1.00

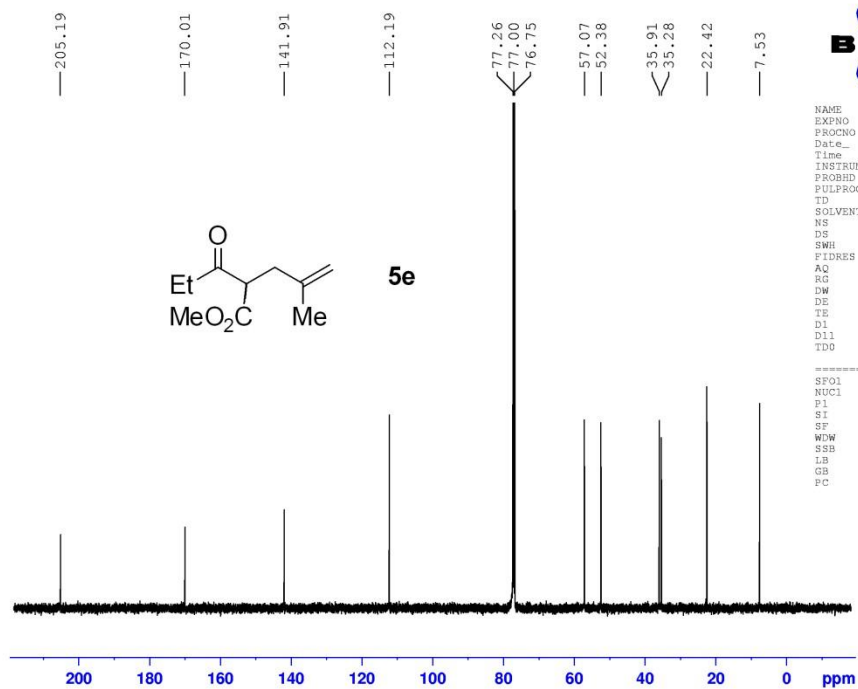

**BRUKER**

NAME 17-23-03-Caoziping  
 EXPNO 11  
 PROCNO 1  
 Date\_ 20160323  
 Time 10.05  
 INSTRUM spect  
 PROBHD 5 mm PABBO BB/  
 PULPROG zgpg30  
 TD 65536  
 SOLVENT CDCl<sub>3</sub>  
 NS 256  
 DS 4  
 SWH 29761.904 Hz  
 FIDRES 0.454131 Hz  
 AQ 1.1010548 sec  
 RG 192.1  
 DW 16.800 usec  
 DE 6.50 usec  
 TE 298.5 K  
 D1 2.0000000 sec  
 D11 0.0300000 sec  
 TD0 1

===== CHANNEL f1 =====  
 SF01 125.7703637 MHz  
 NUC1 13C  
 P1 10.00 usec  
 SI 32768  
 SF 125.7577919 MHz  
 WDW EM  
 SSB 0  
 LB 1.00 Hz  
 GB 0  
 PC 1.40

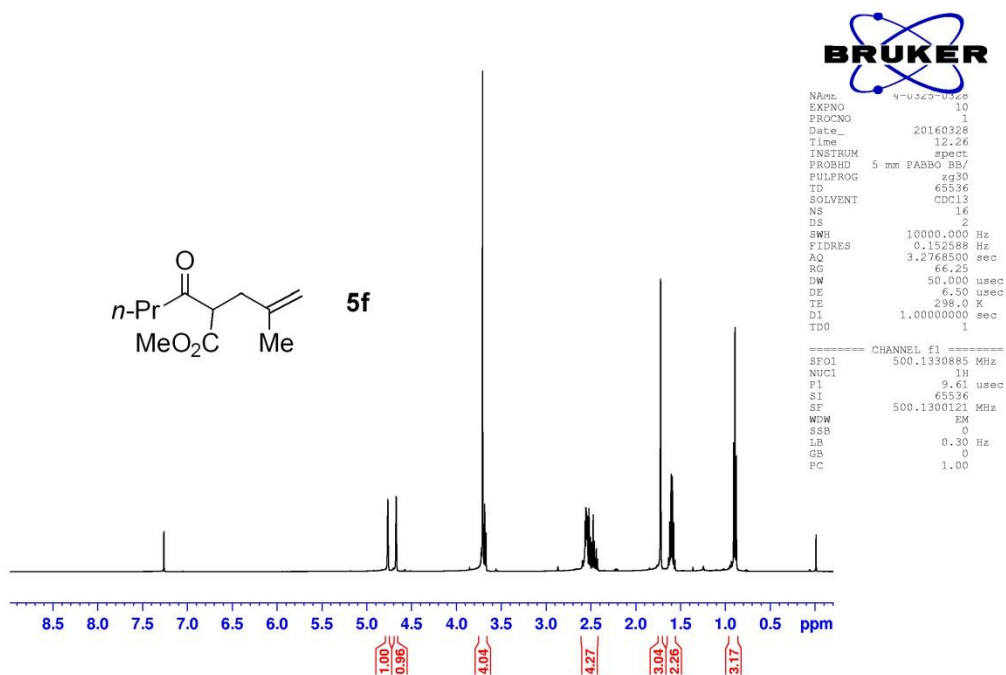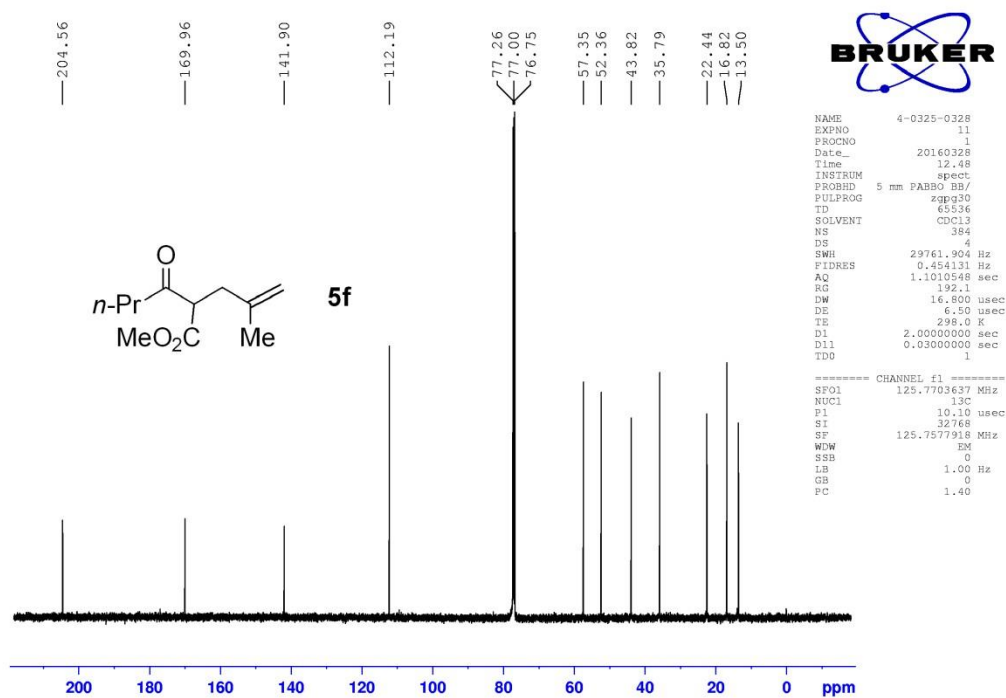



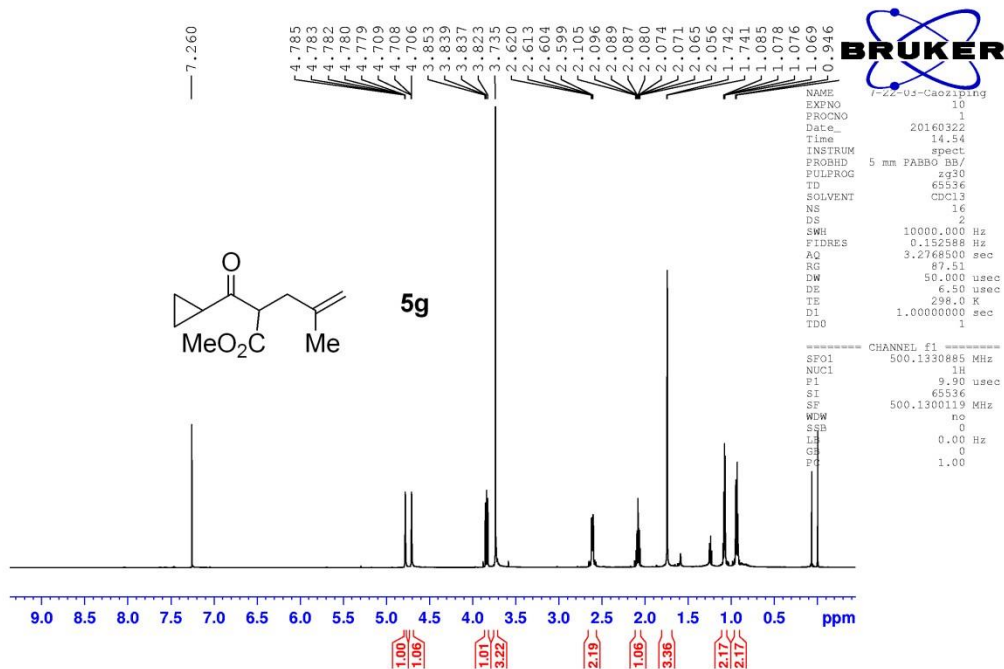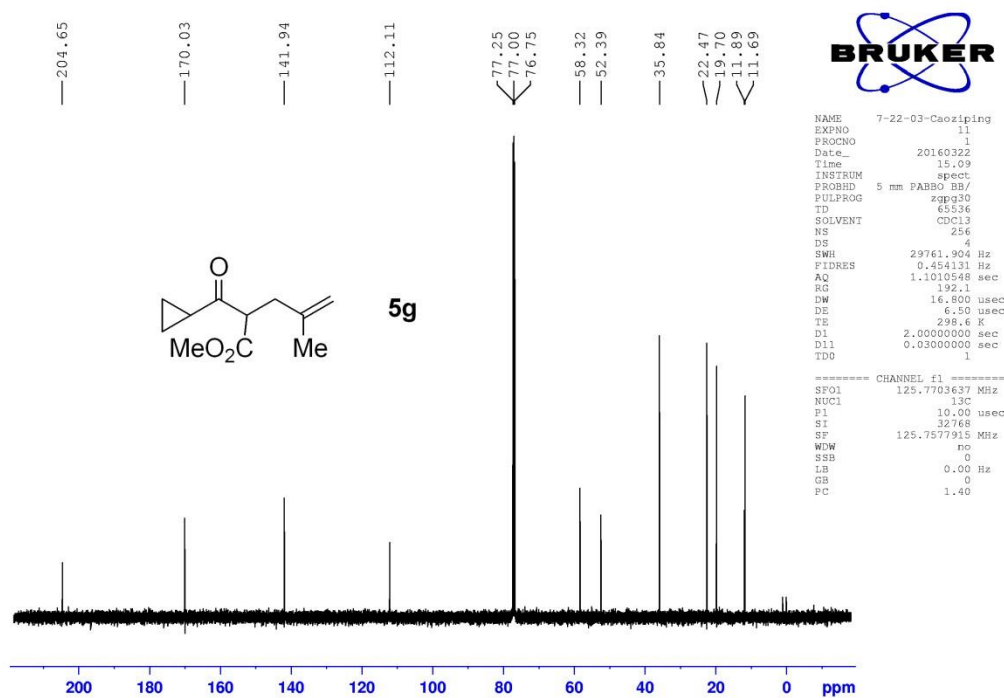

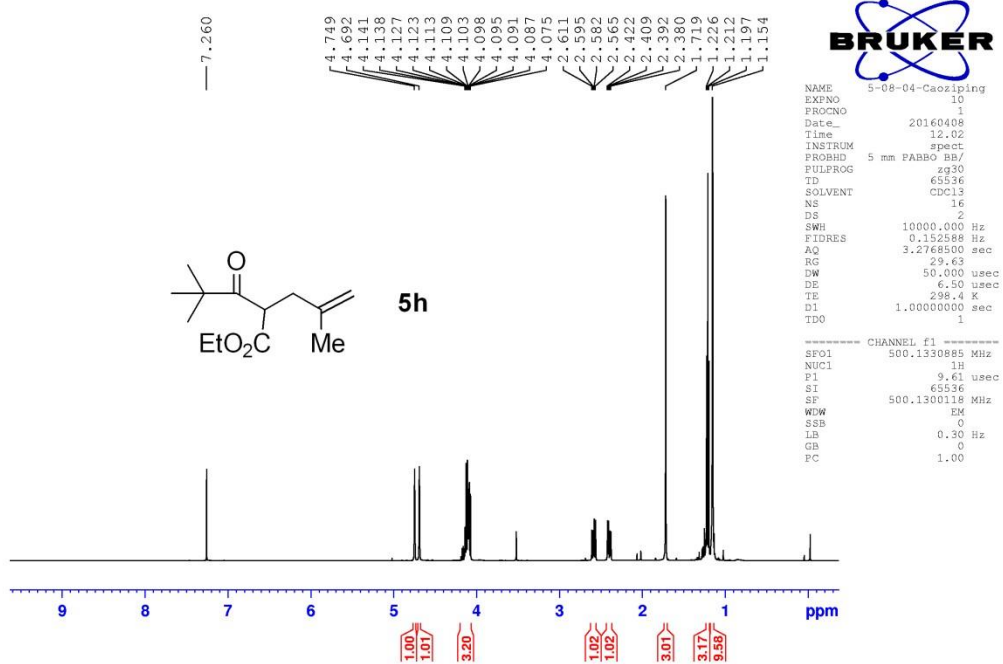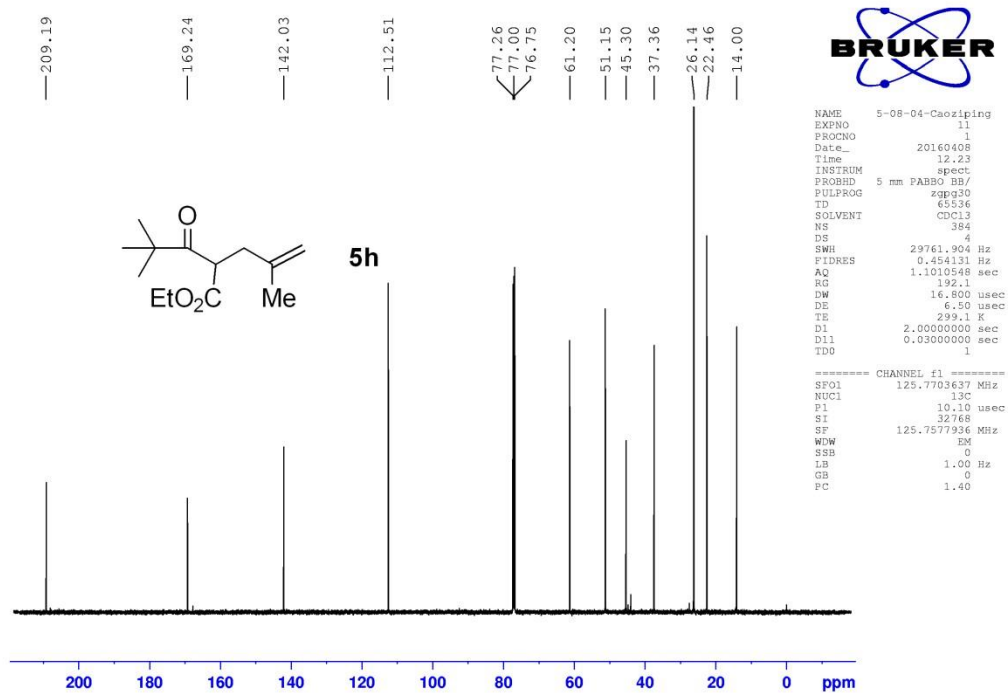

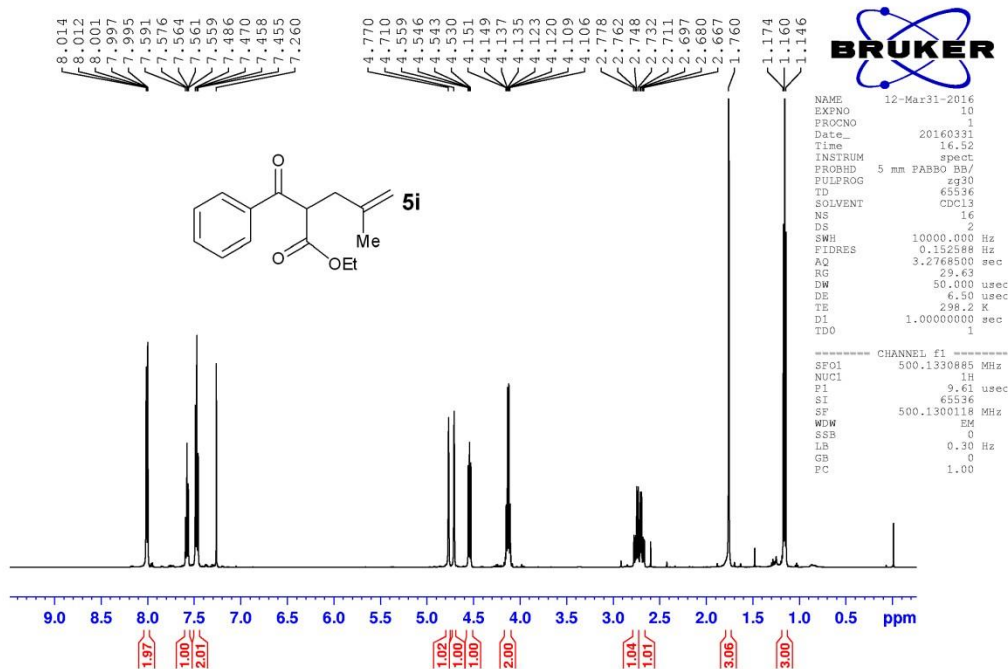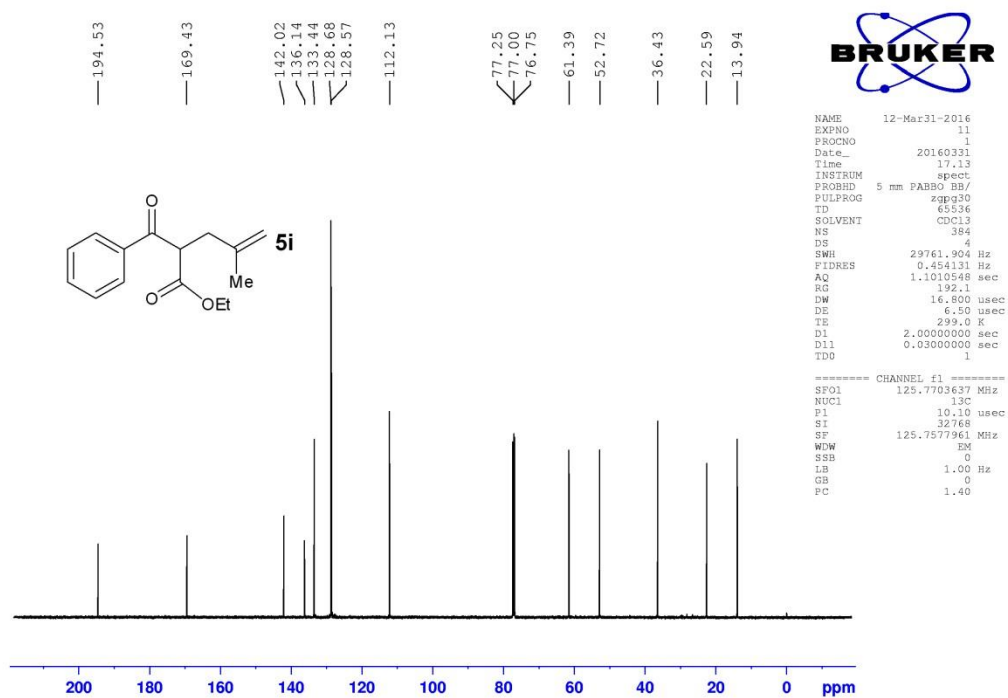

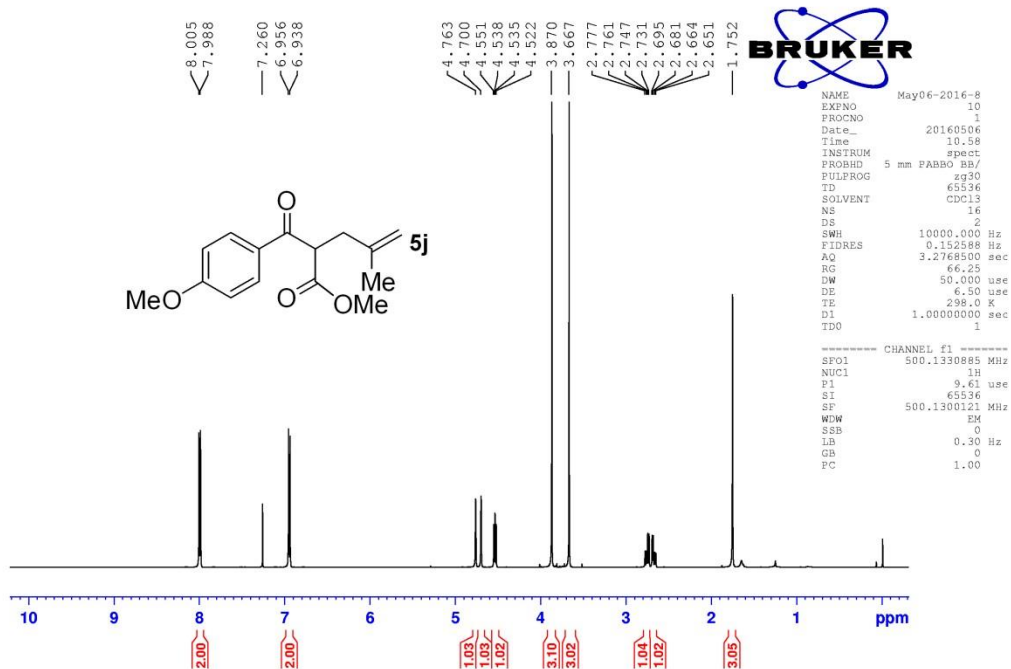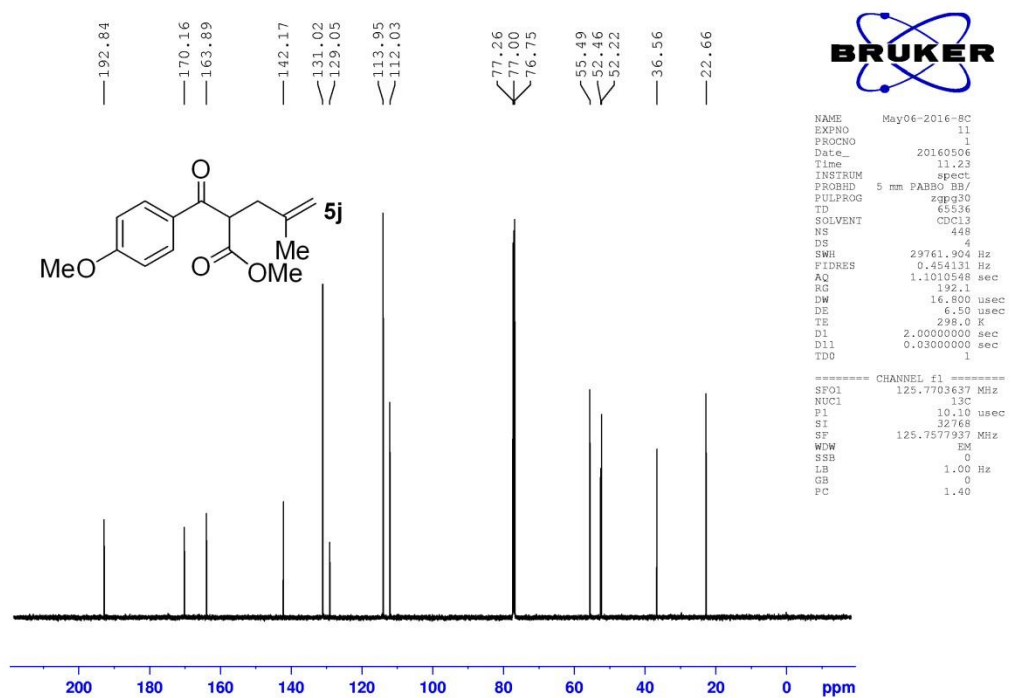

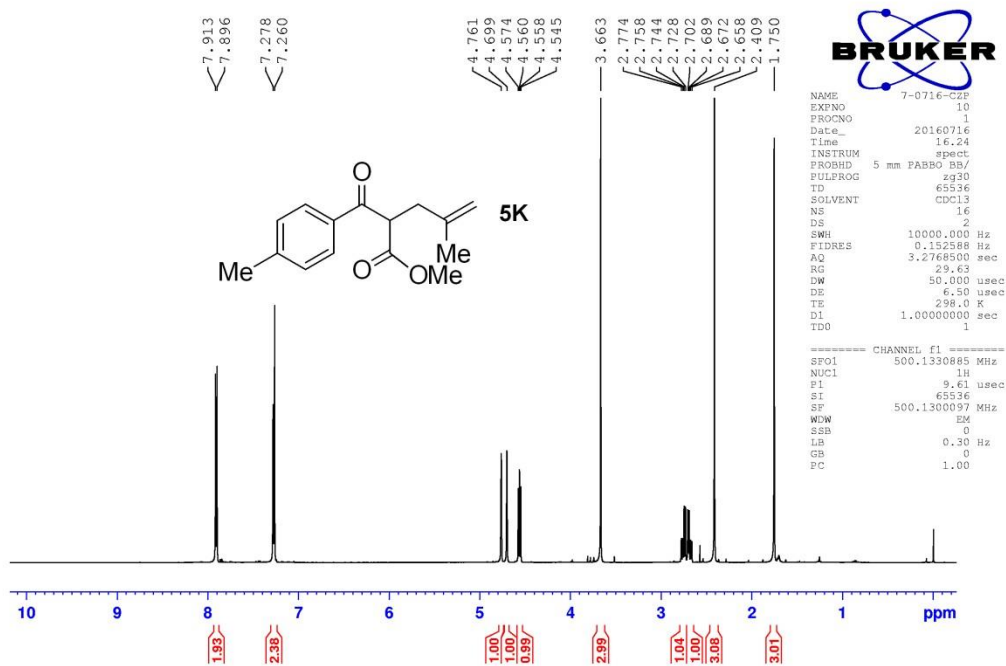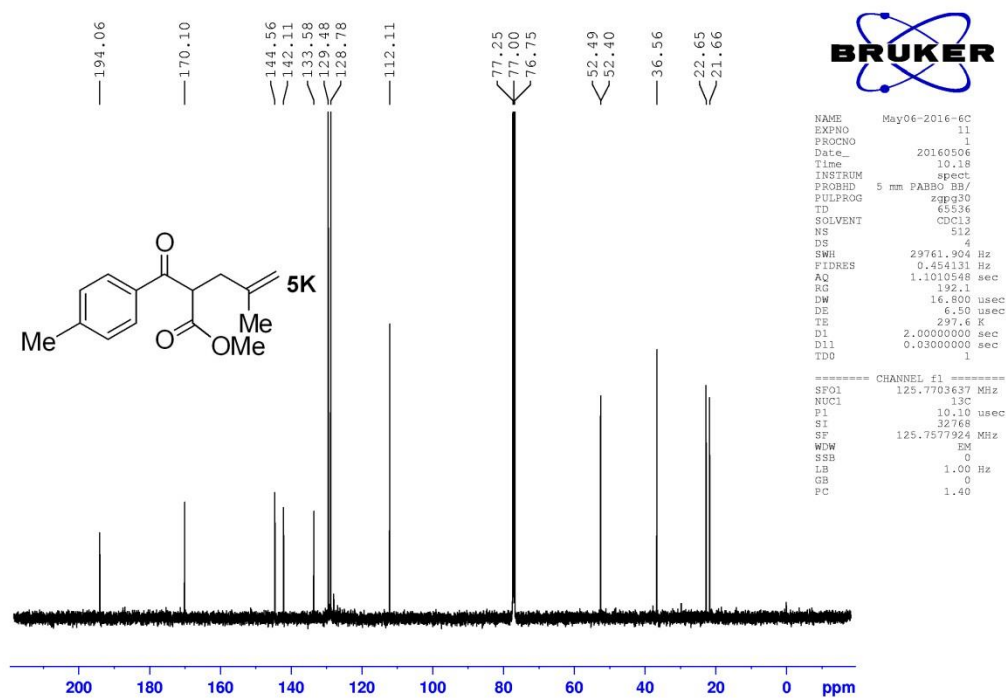

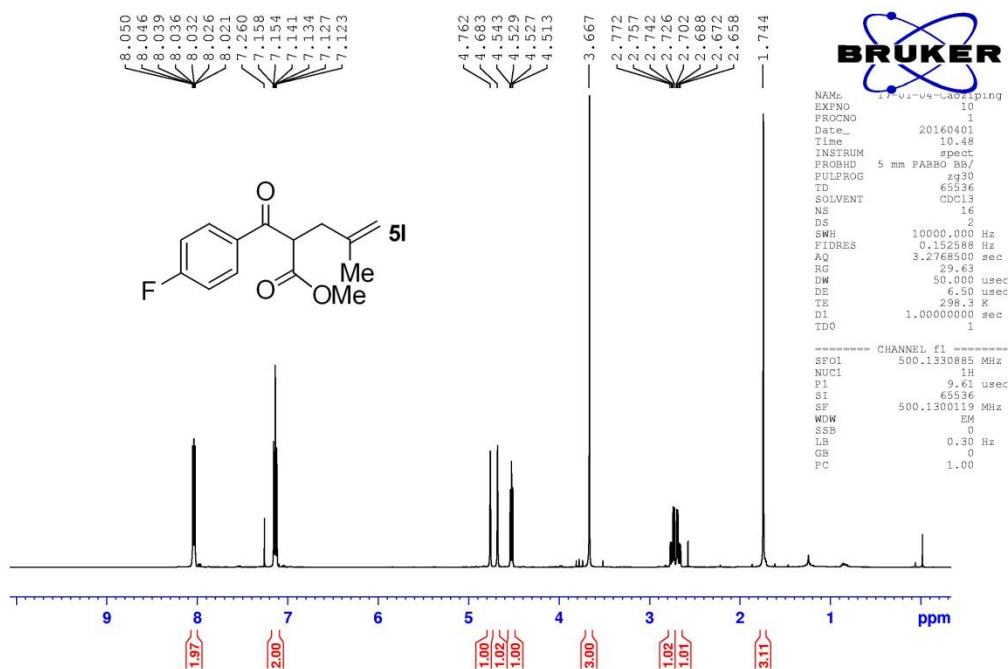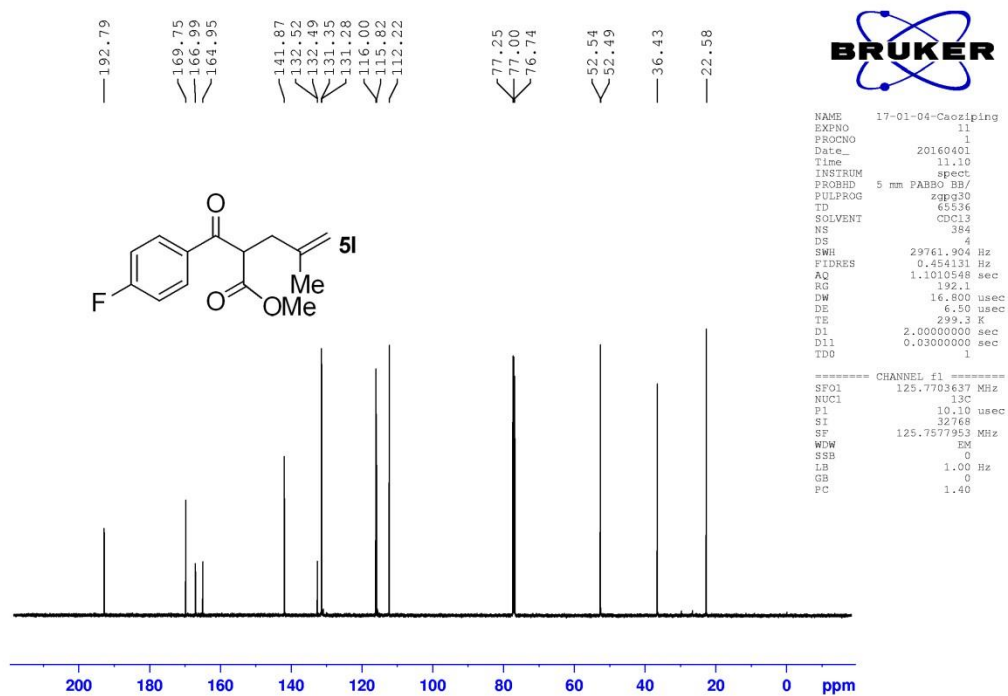

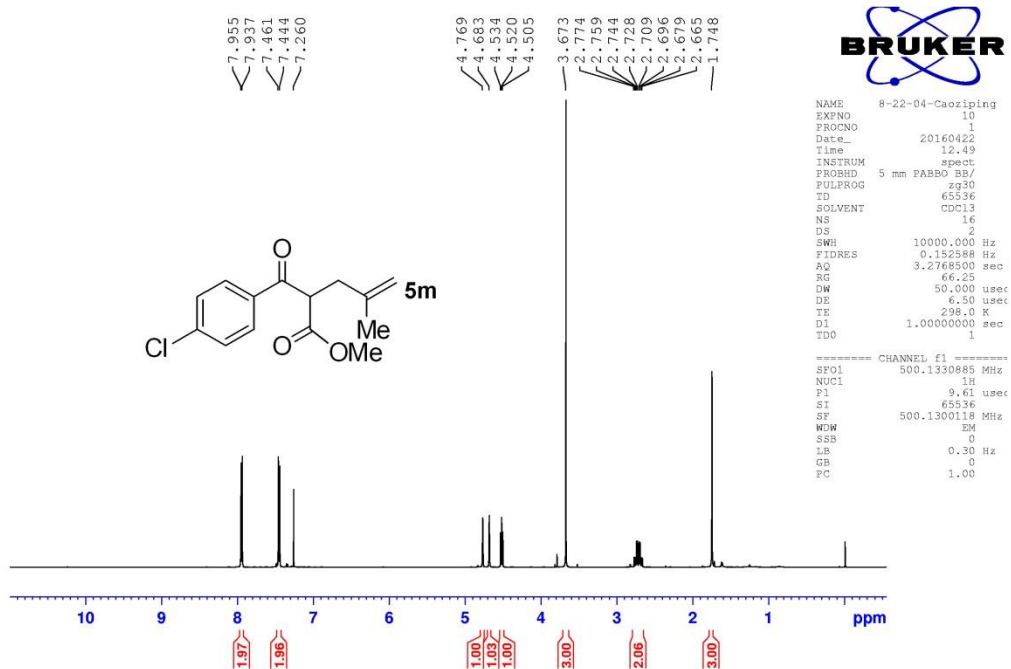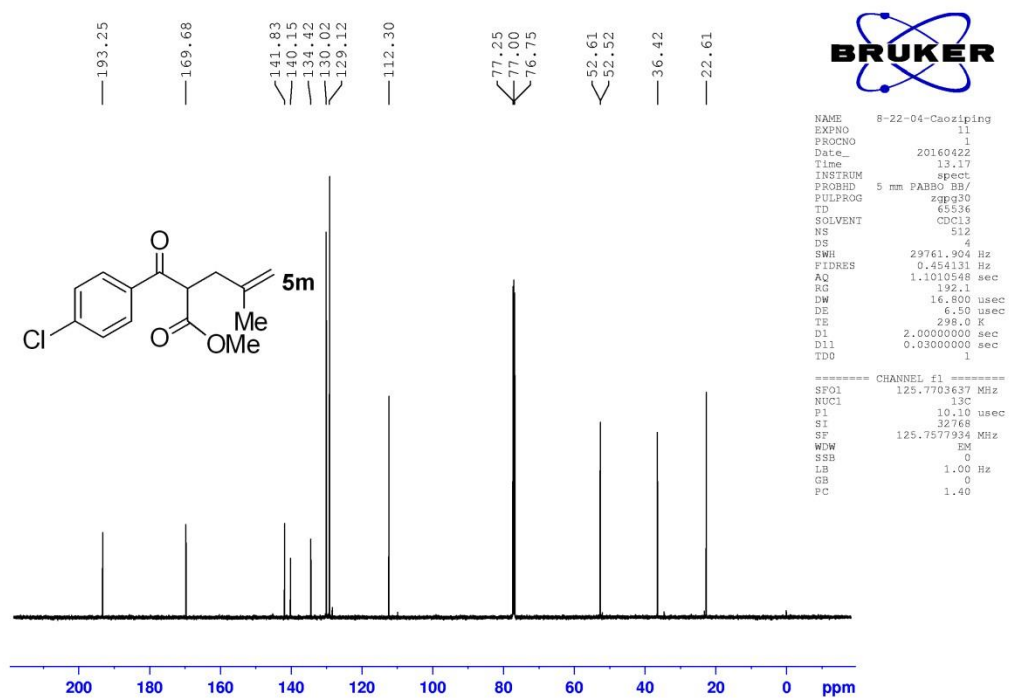

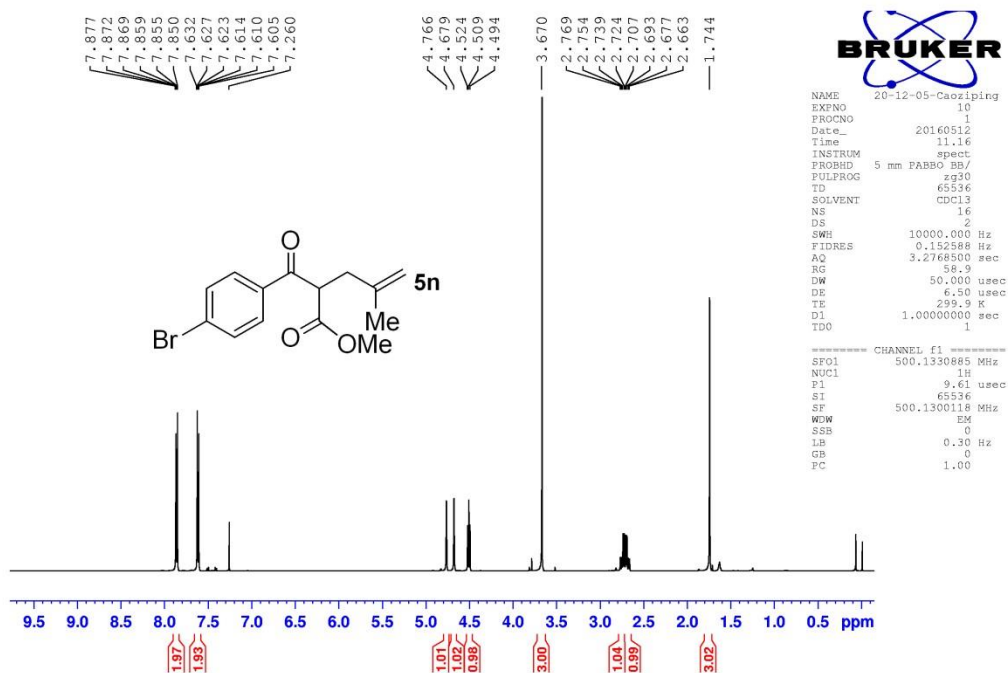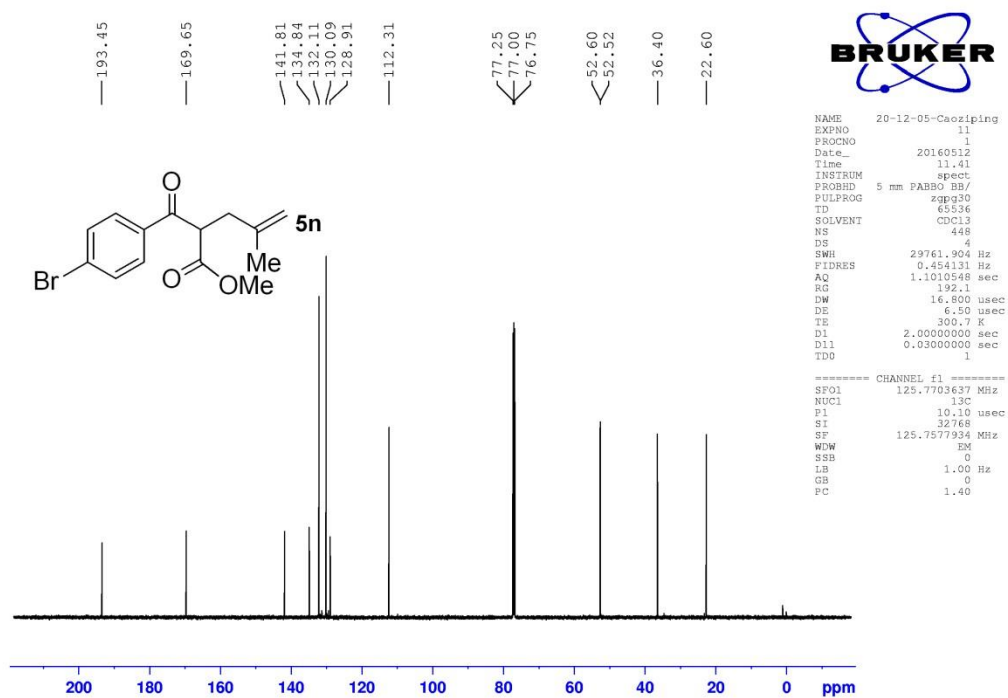



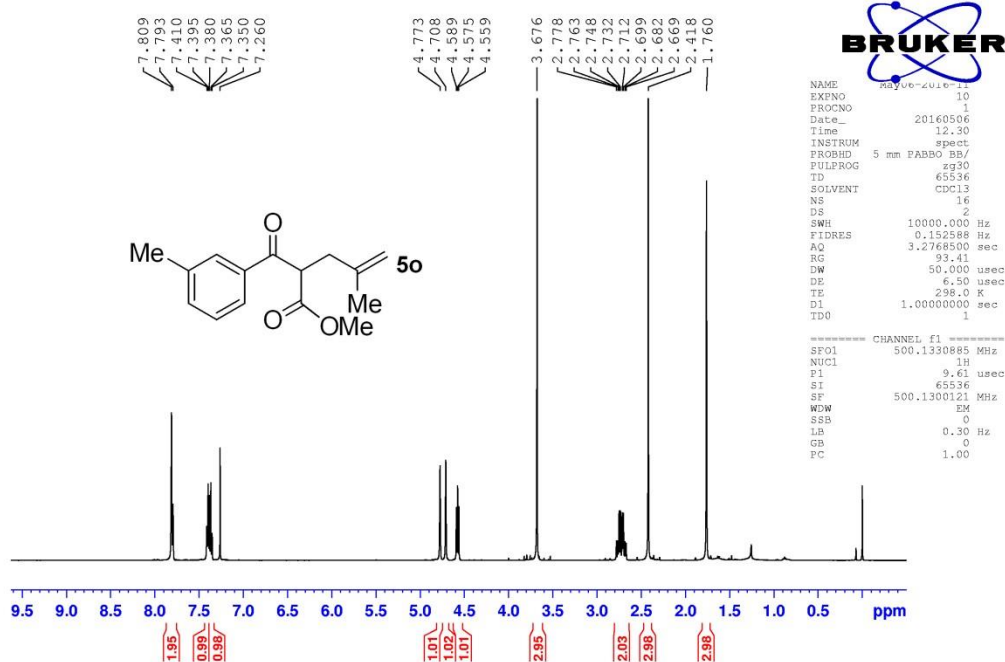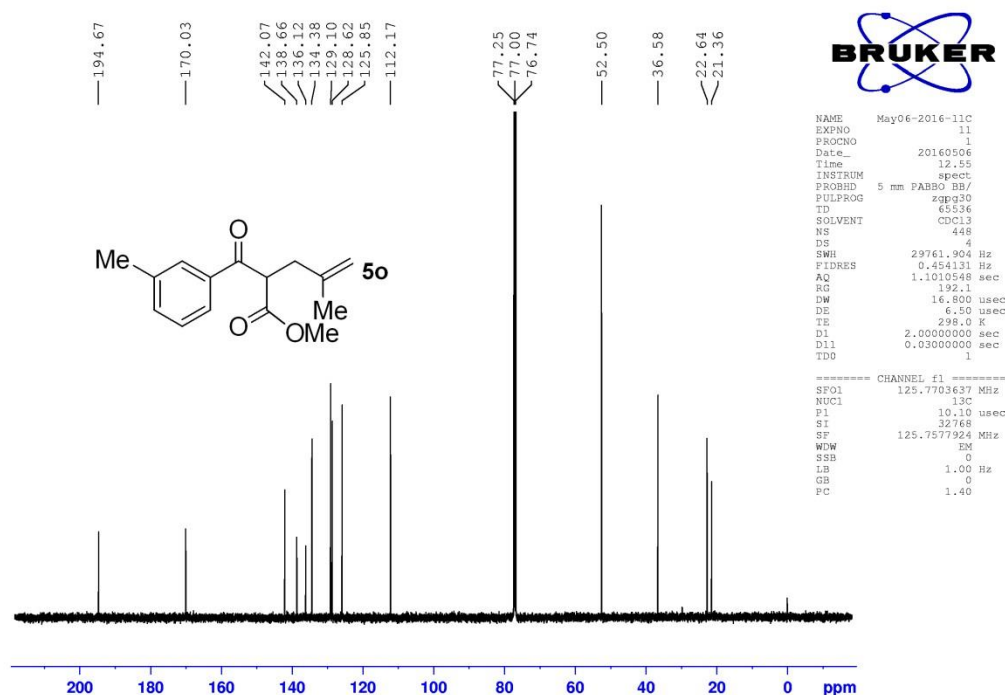

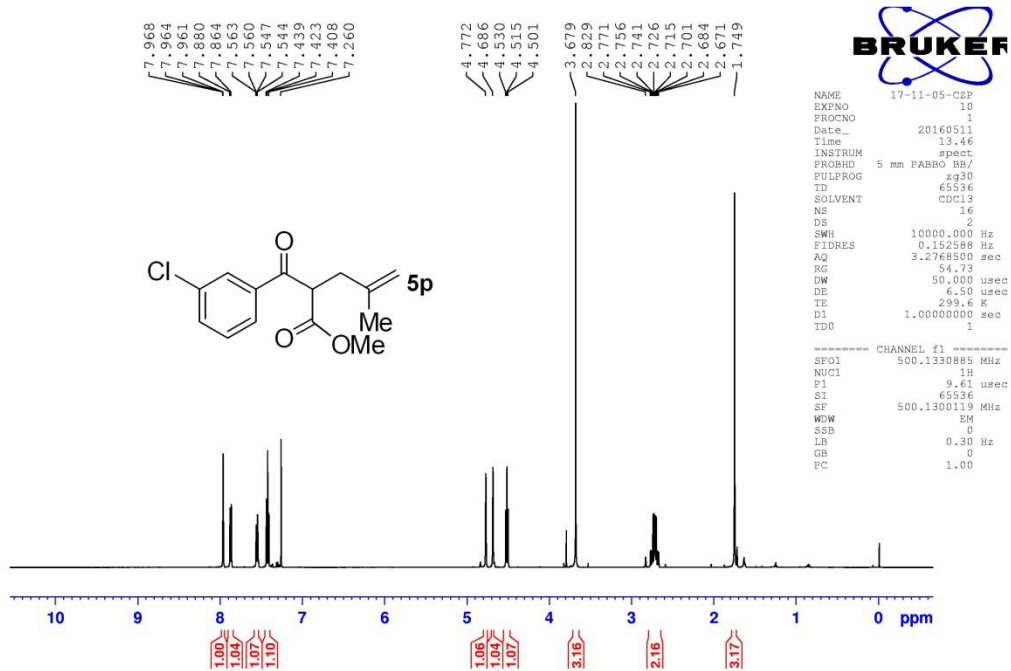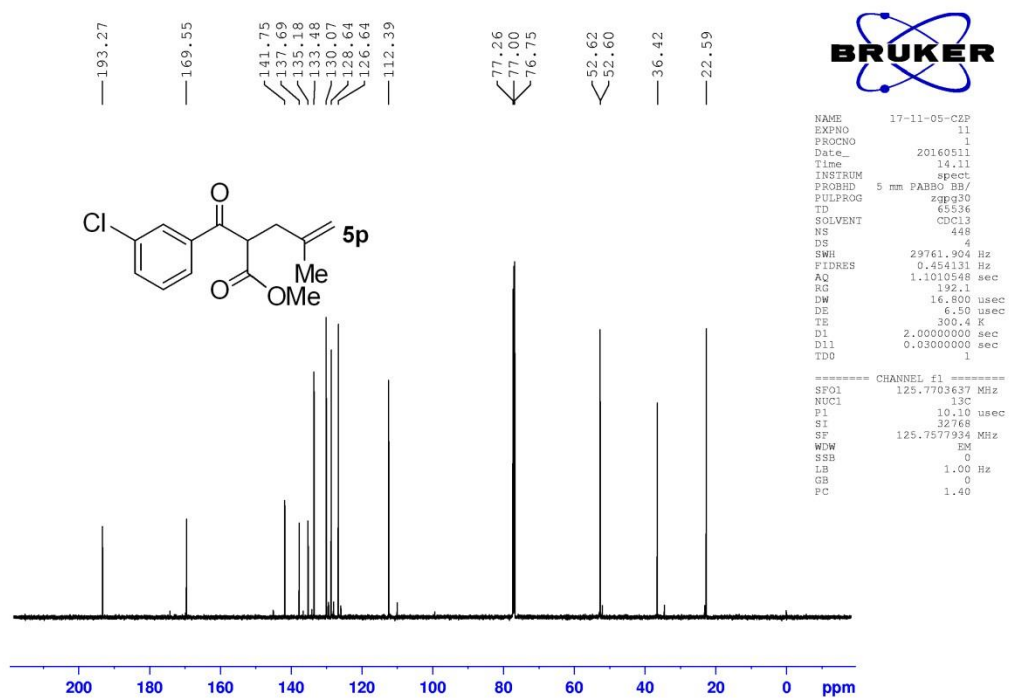

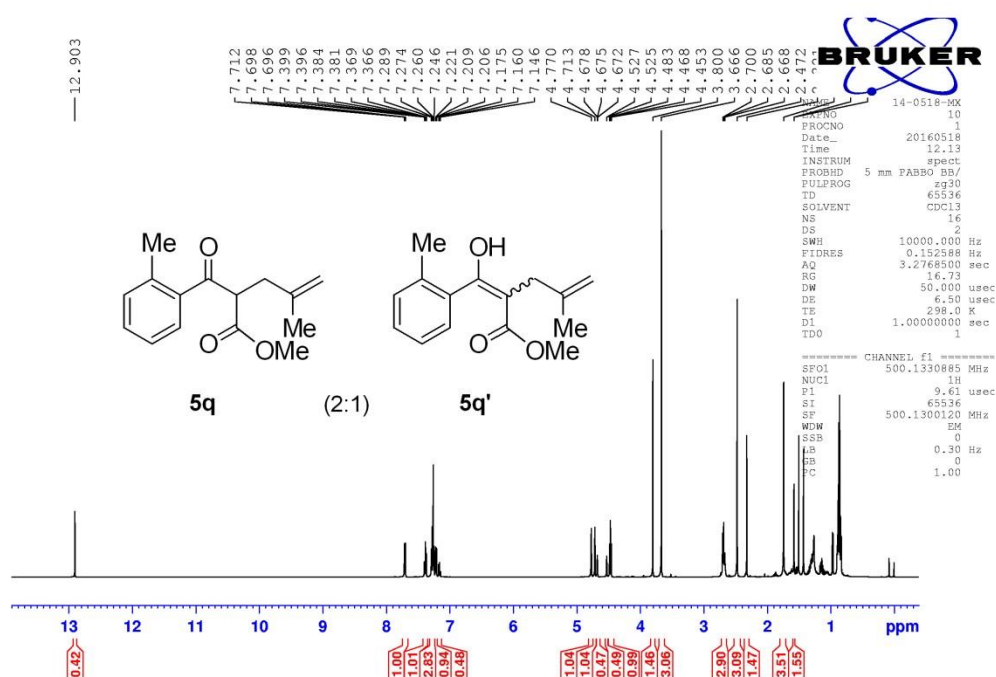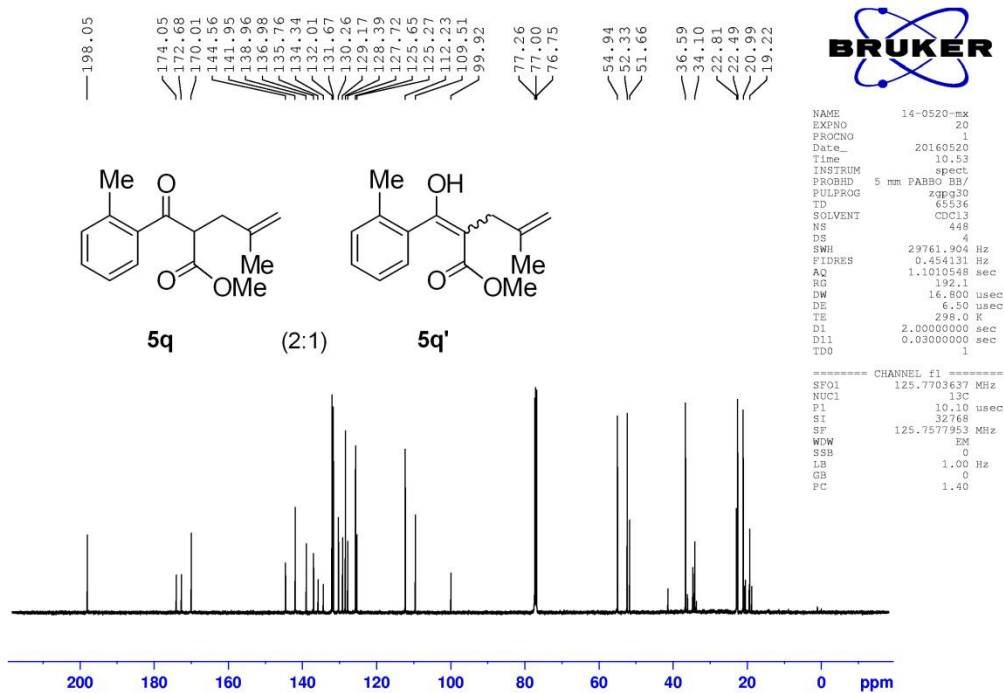

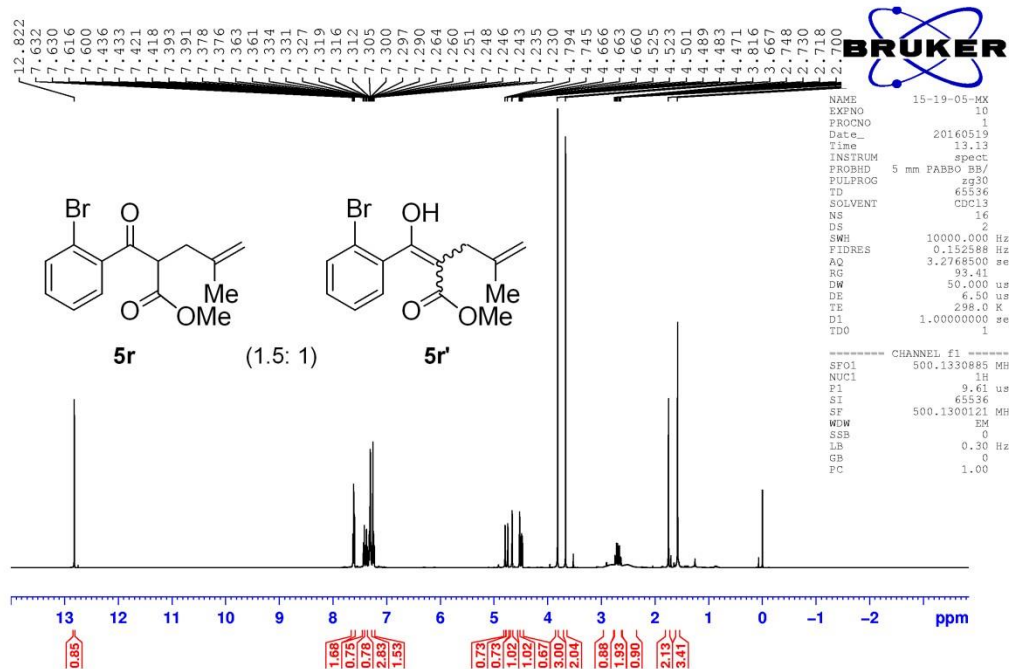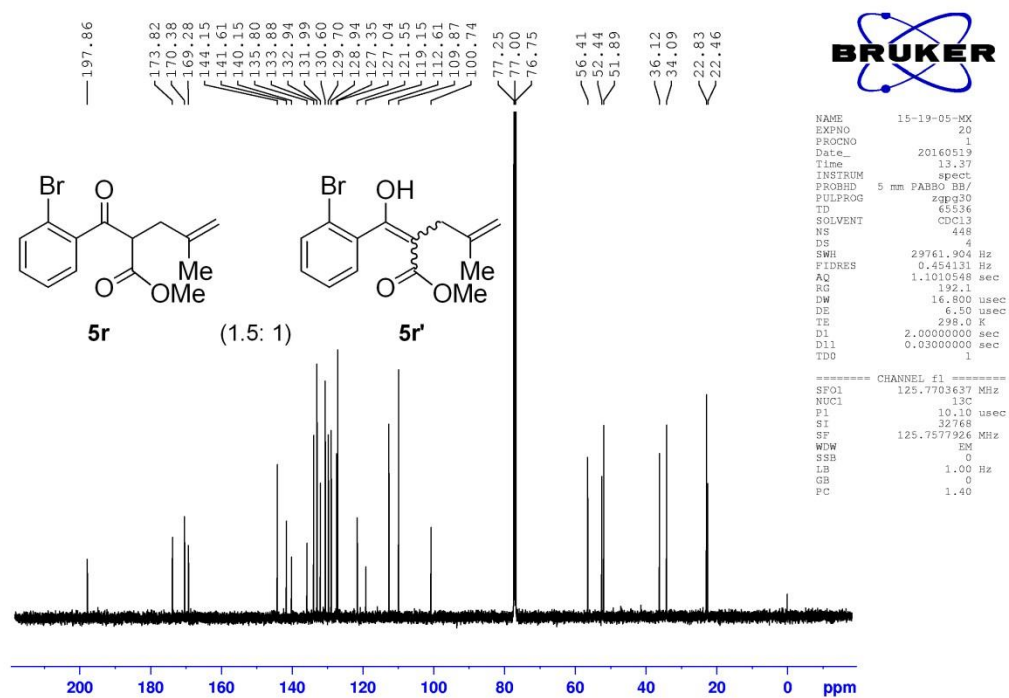

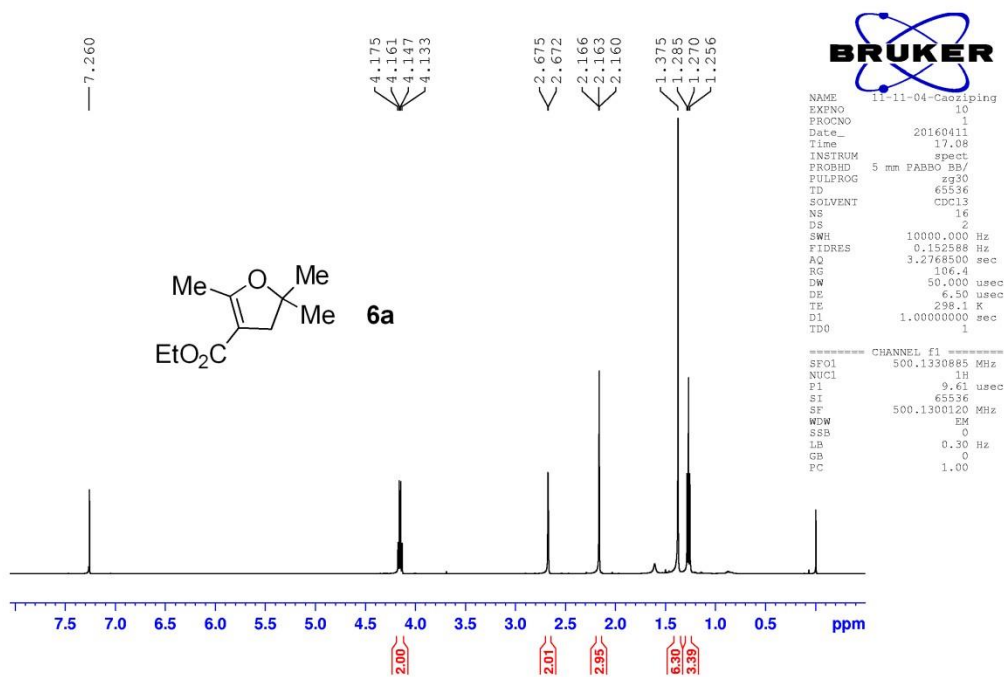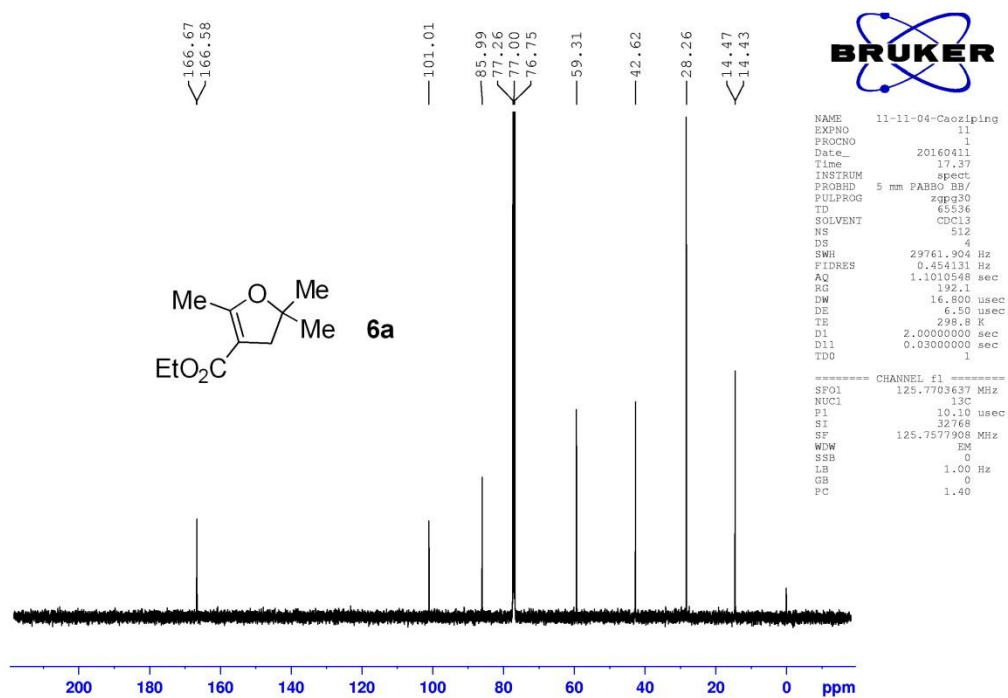

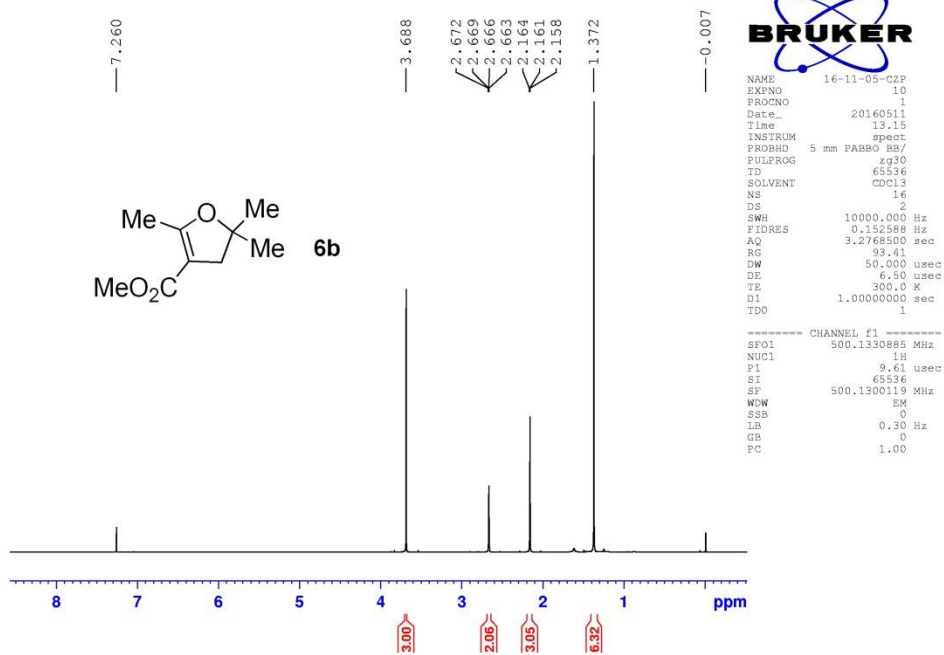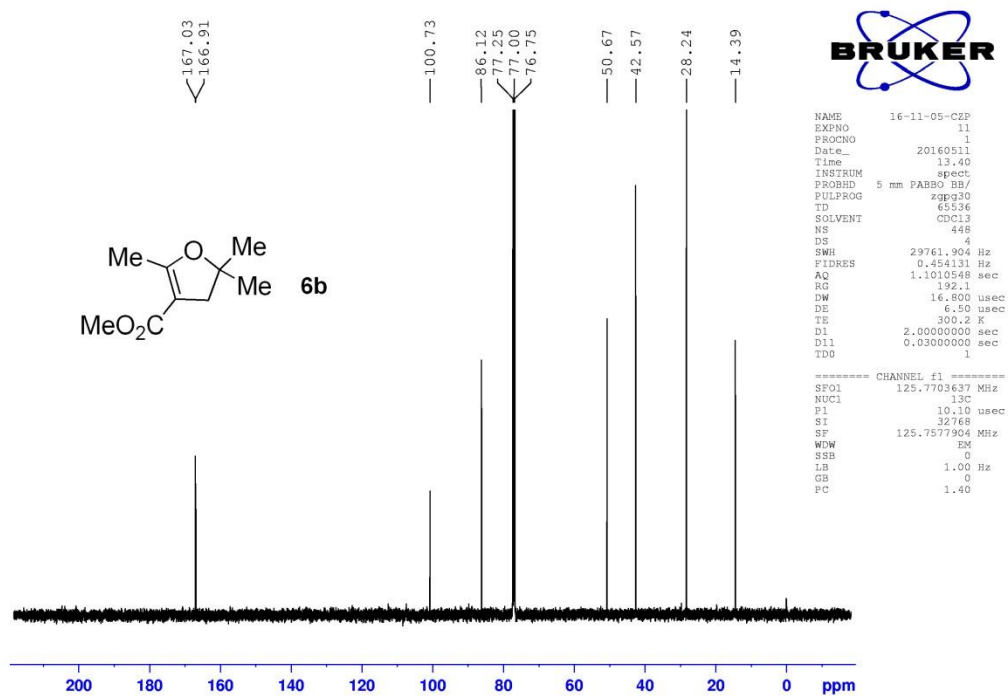

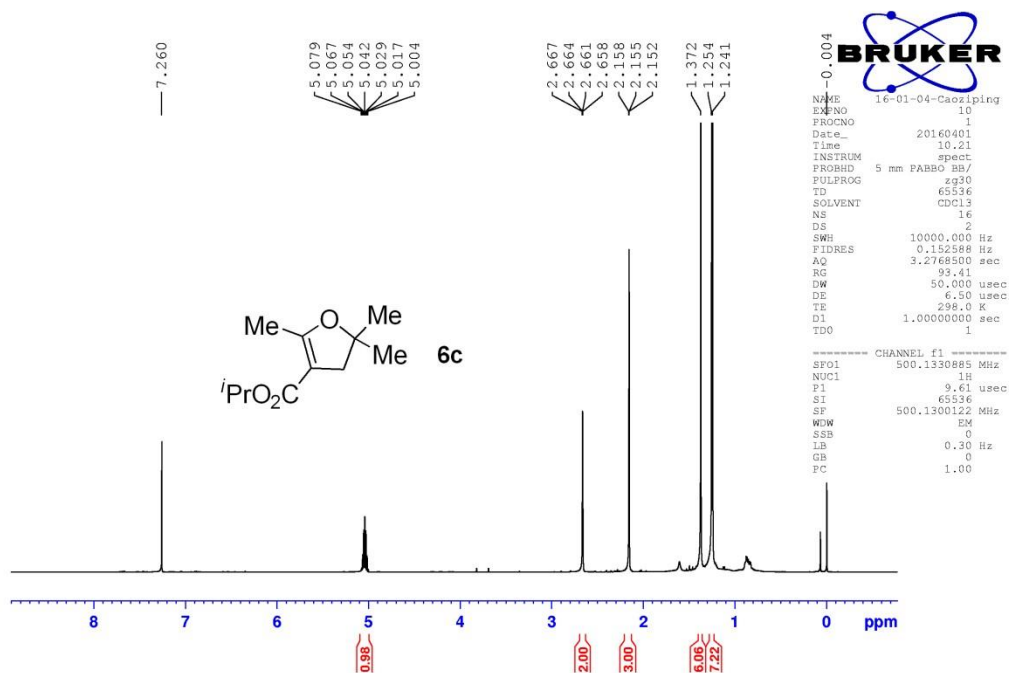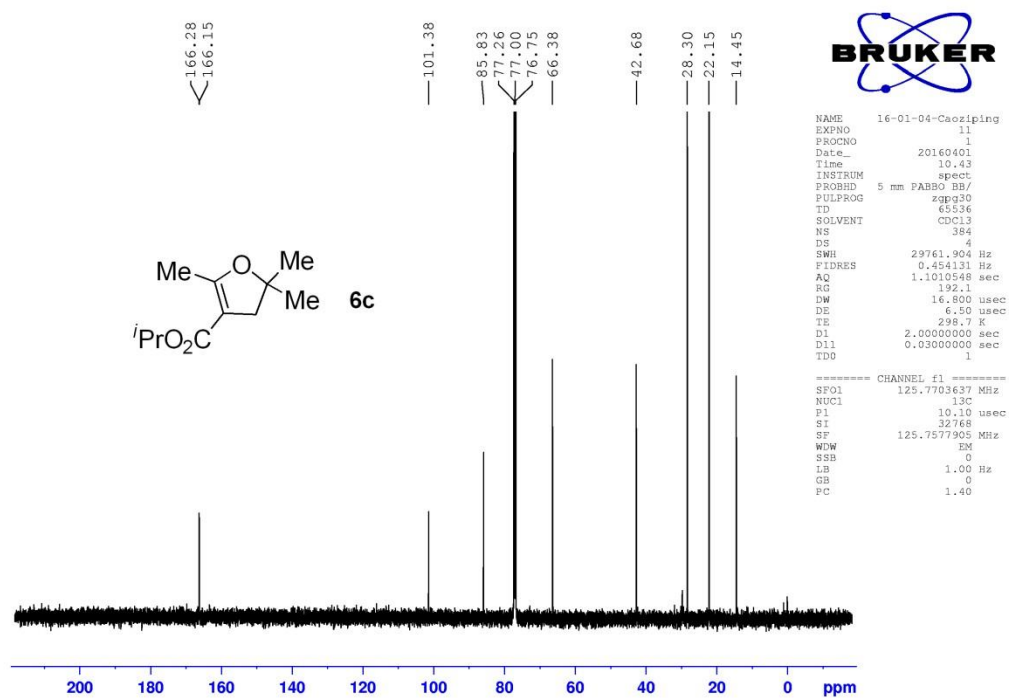

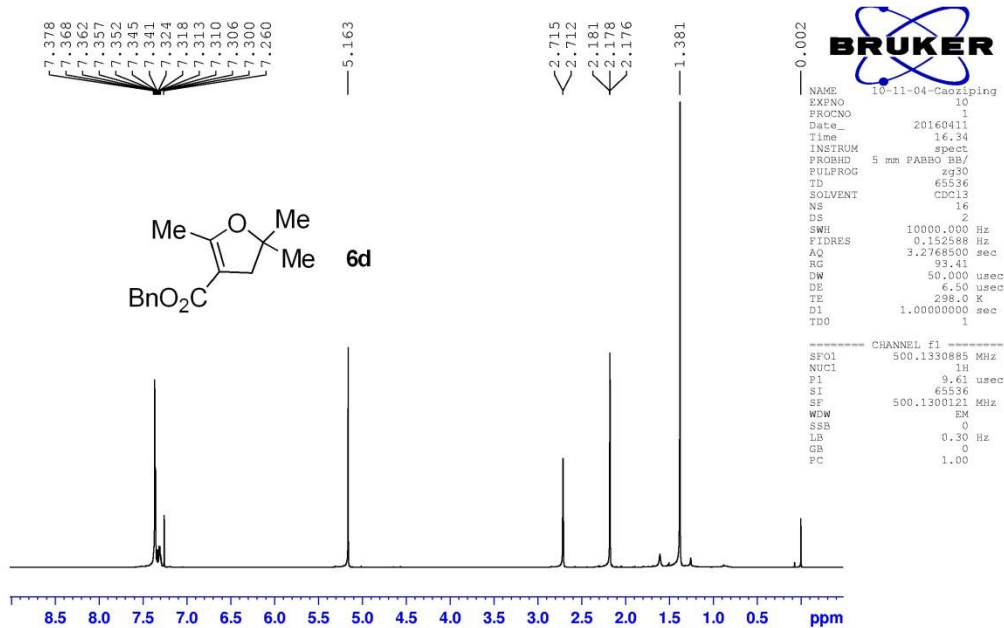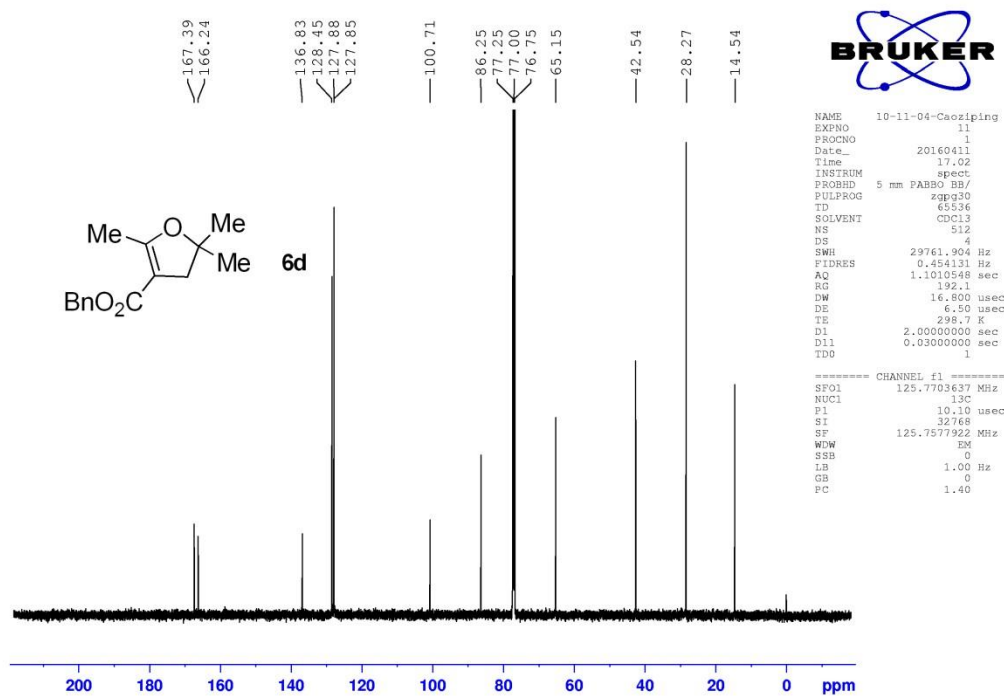



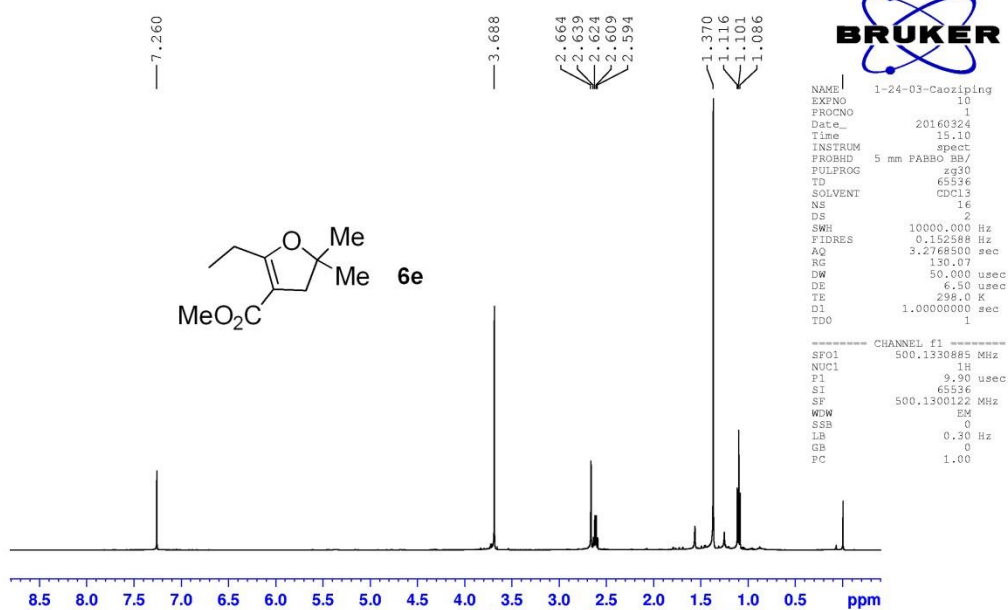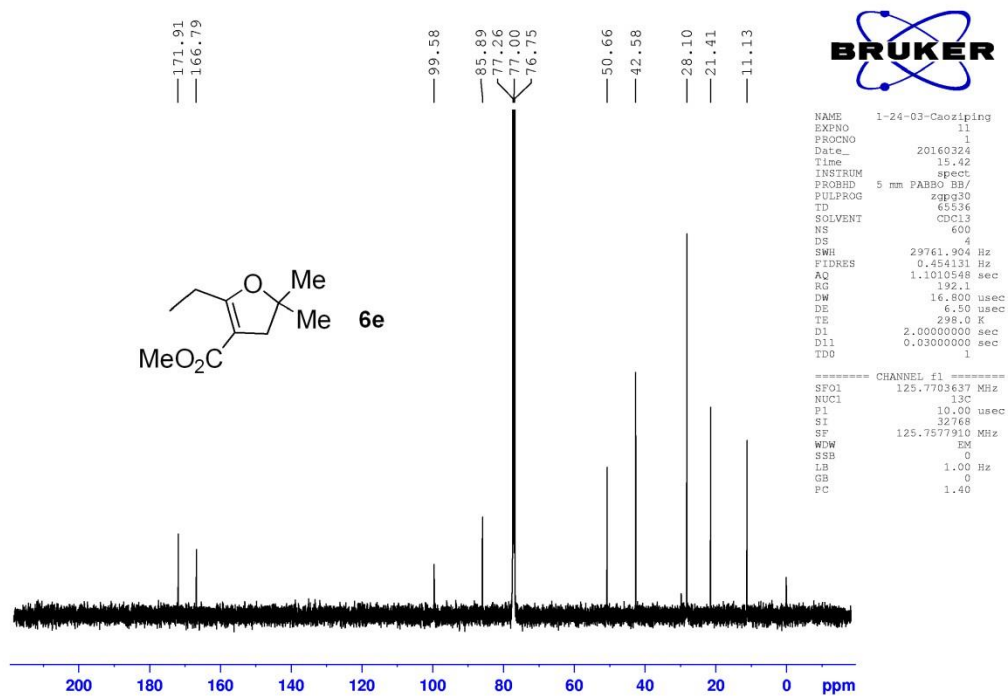

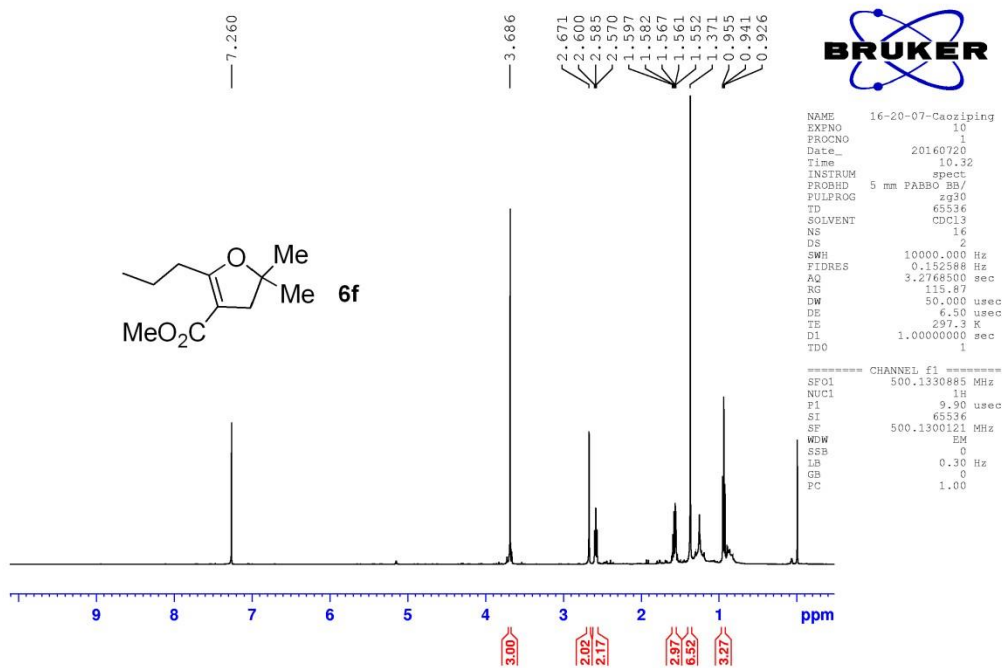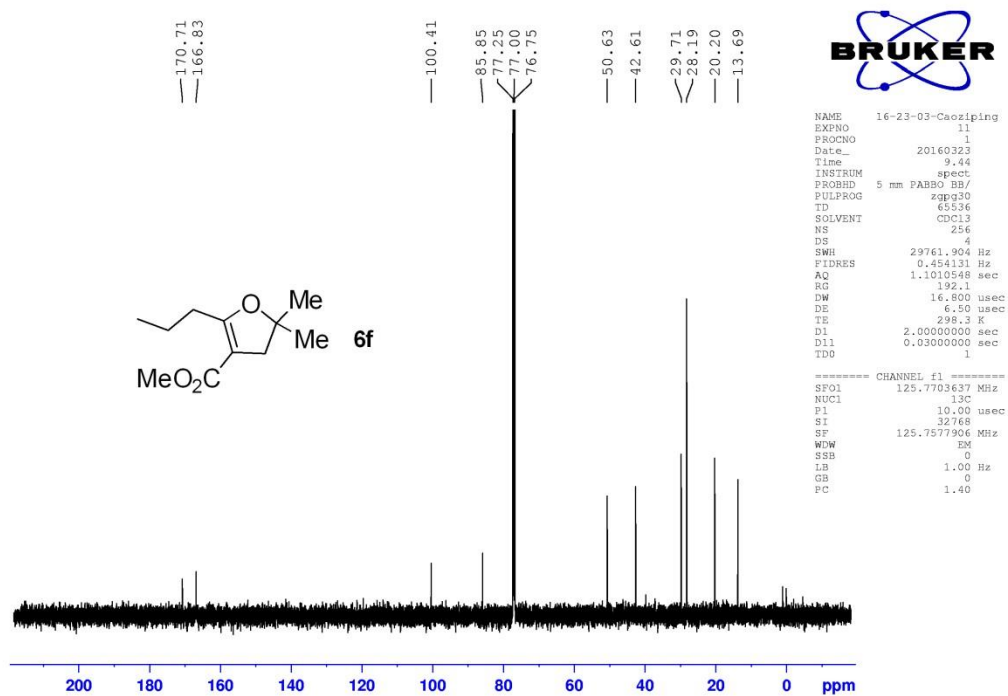

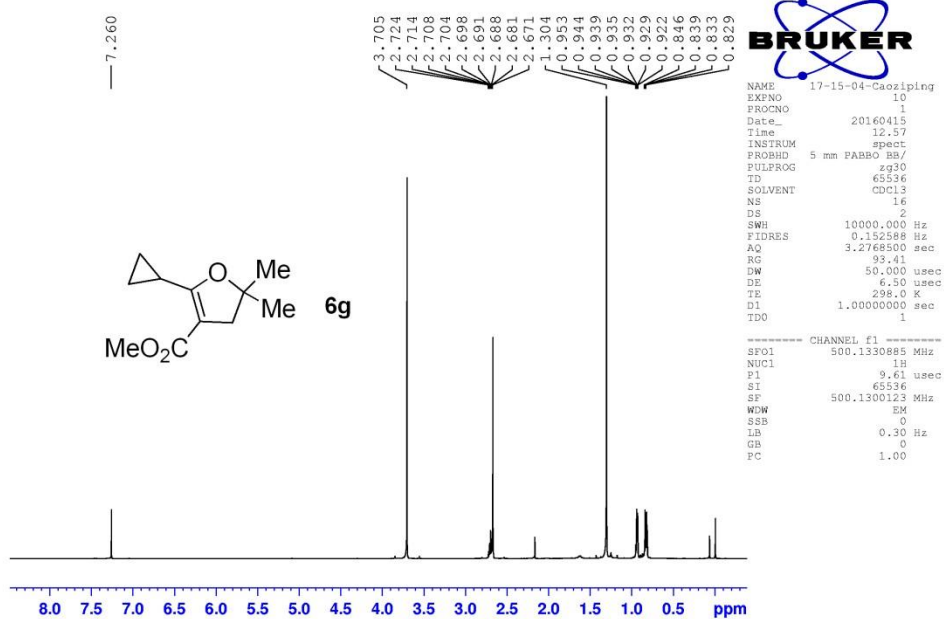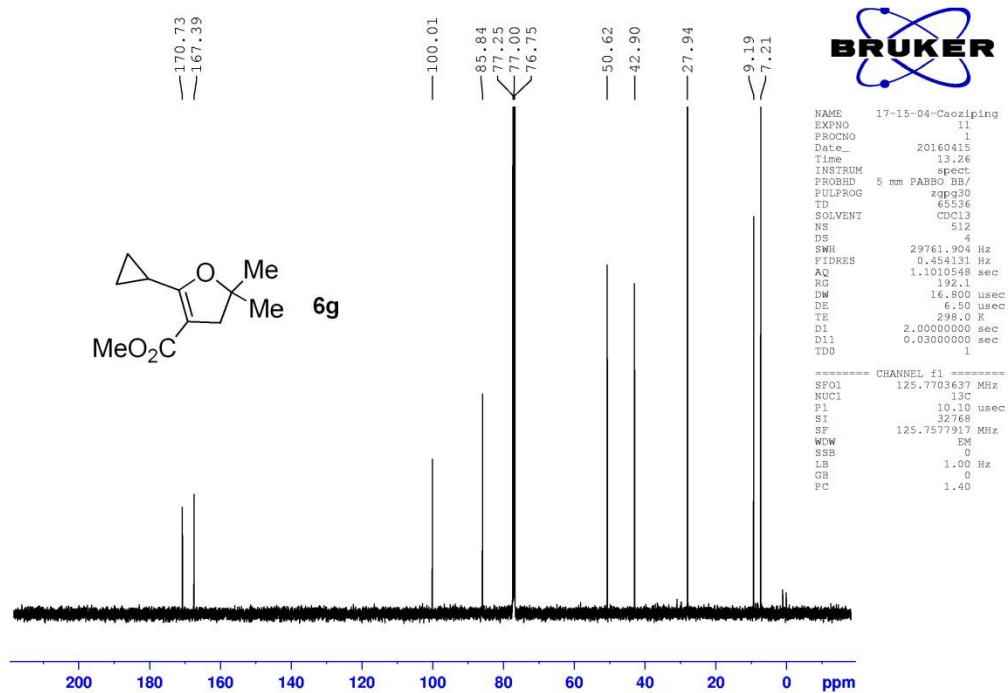

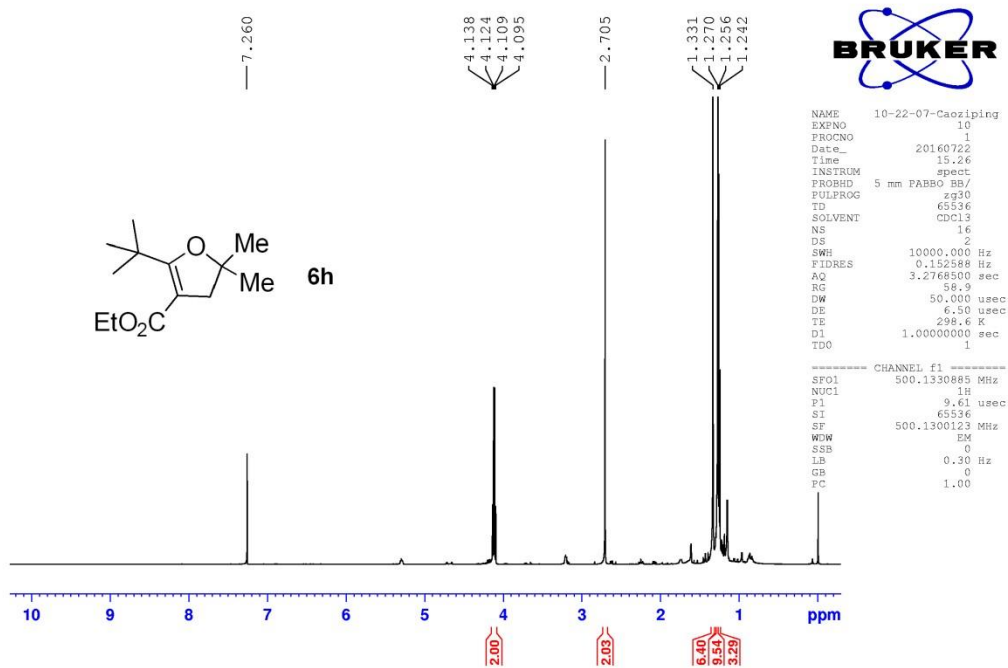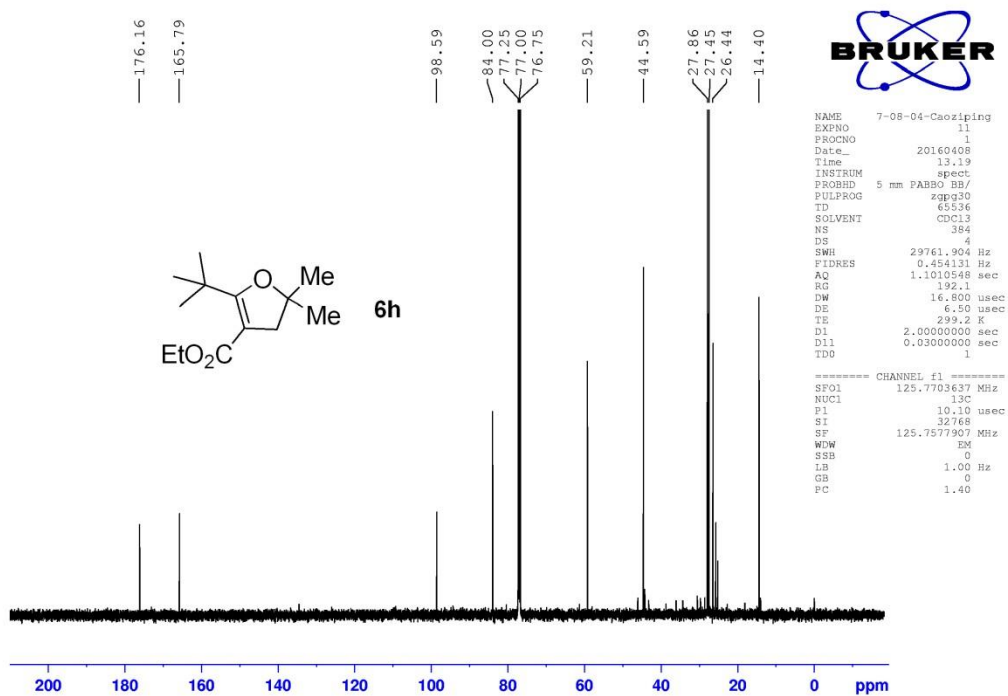

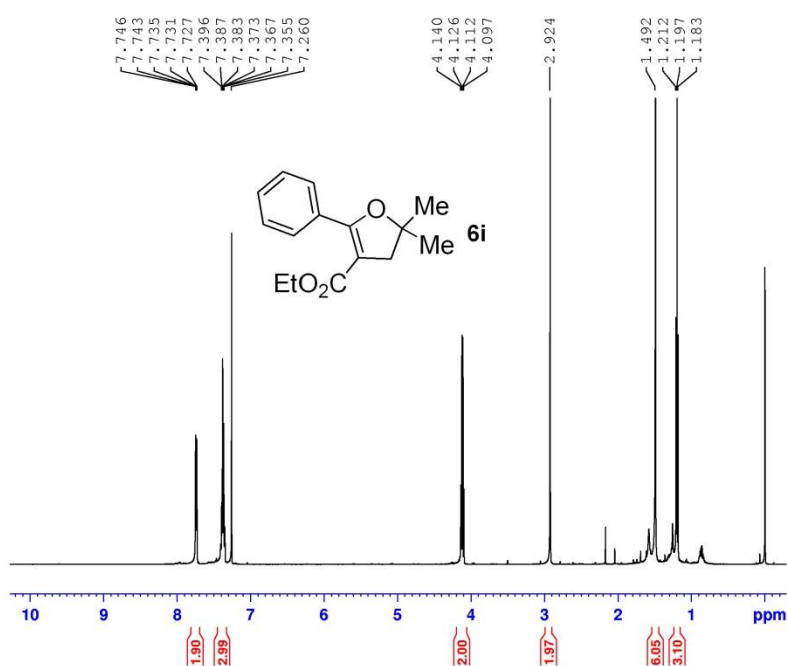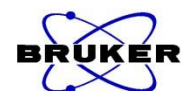

```

NAME      liangg
EXPNO     10
PROCNO    1
Date_     20160331
Time      16:16
INSTRUM   spect
PROBHD    5 mm PABBO BB/
PULPROG   zg30
TD         65536
SOLVENT   CDCl3
NS         16
DS         2
SWH        10000.000 Hz
FIDRES     0.152588 Hz
AQ         3.2768500 sec
RG         130.07
DW         50.000 usec
DE         6.50 usec
TE         298.0 K
D1         1.00000000 sec
TDO        1

===== CHANNEL f1 =====
SFO1      500.1330885 MHz
NUC1       1H
P1         9.41 usec
SI         65536
SF         500.1300123 MHz
WDW        EM
SSB        0
LB         0.30 Hz
GB         0
PC         1.00

```

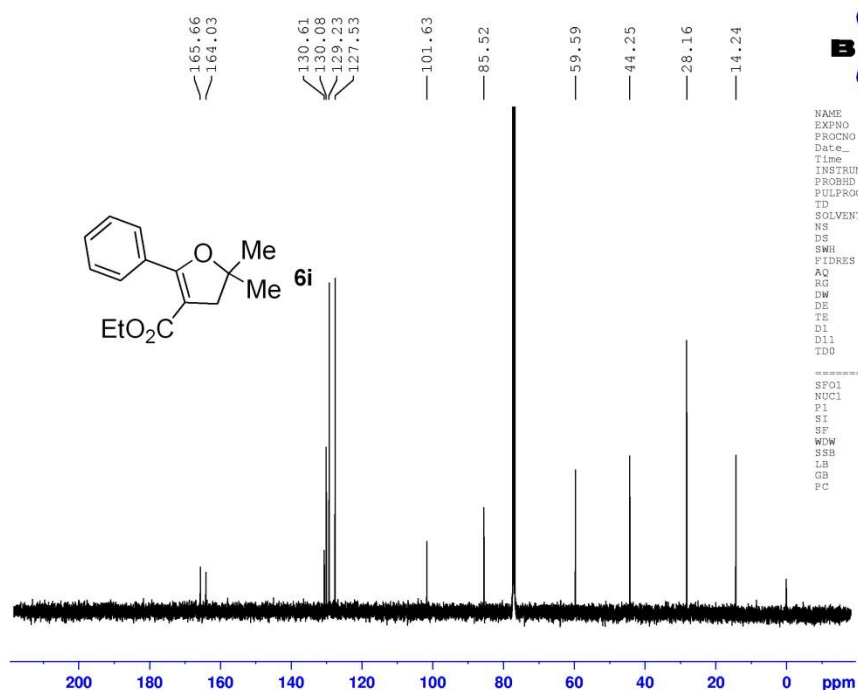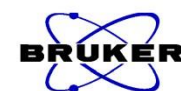

```

NAME      liangg
EXPNO     20
PROCNO    1
Date_     20160331
Time      16:46
INSTRUM   spect
PROBHD    5 mm PABBO BB/
PULPROG    zgpg30
TD         65536
SOLVENT   CDCl3
NS         512
DS         4
SWH        29761.904 Hz
FIDRES     0.454131 Hz
AQ         1.1010548 sec
RG         192.1
DW         16.800 usec
DE         6.50 usec
TE         298.7 K
D1         2.00000000 sec
D11        0.03000000 sec
TDO        1

===== CHANNEL f1 =====
SFO1      125.7703637 MHz
NUC1      13C
P1        10.10 usec
SI        32768
SF        125.7577908 MHz
WDW        EM
SSB        0
LB         1.00 Hz
GB         0
PC         1.40

```

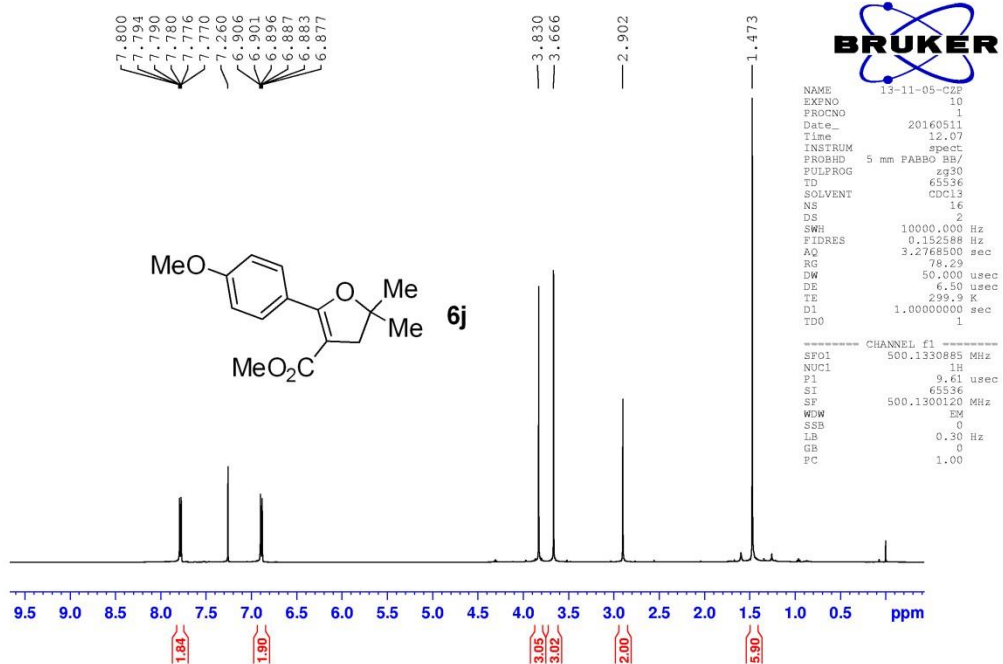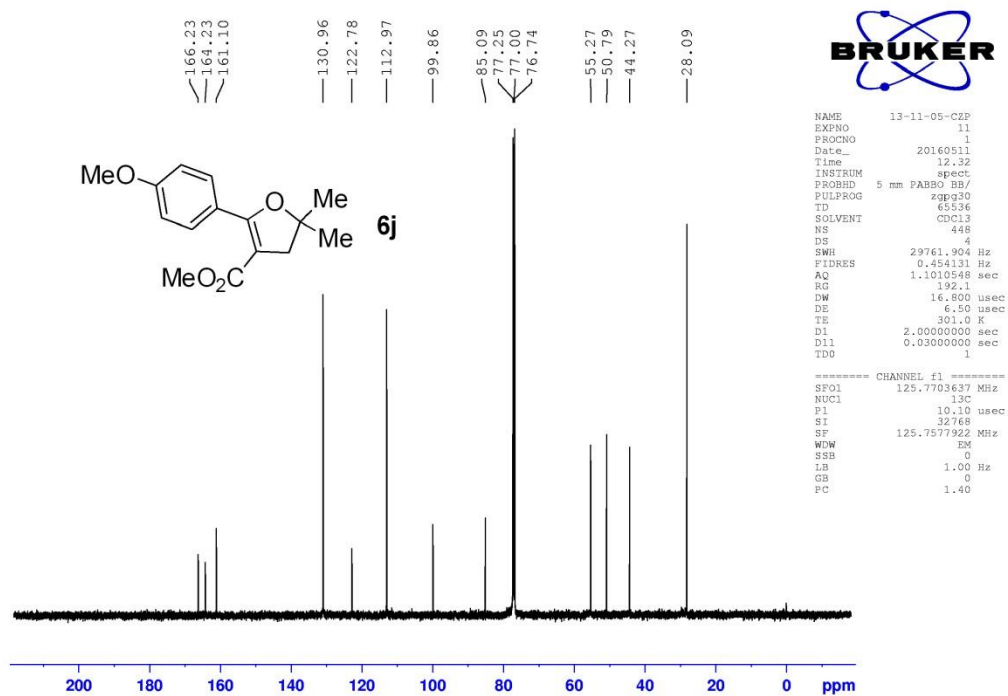

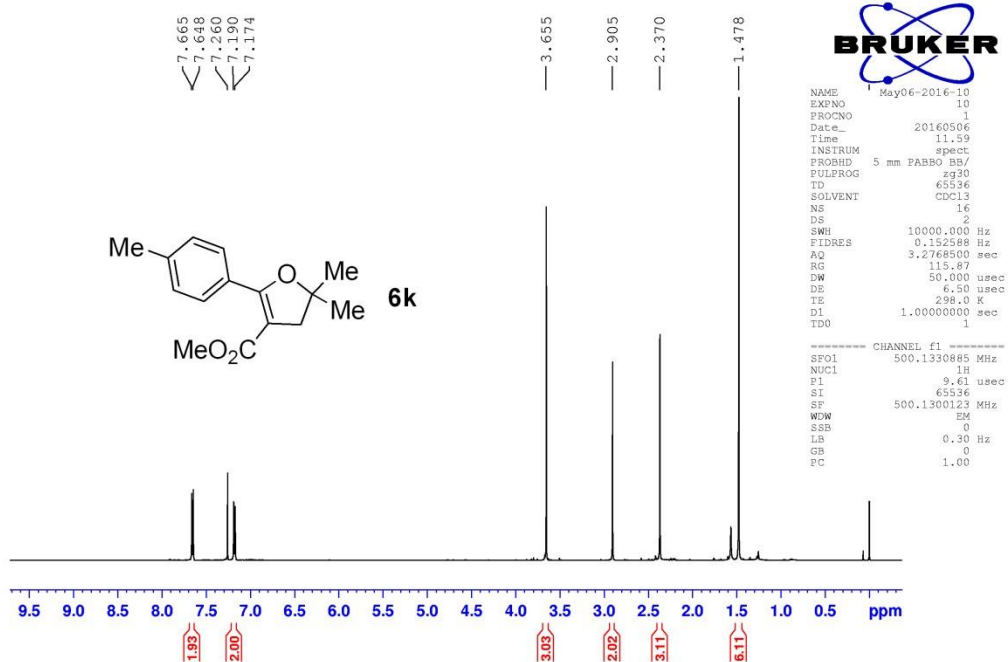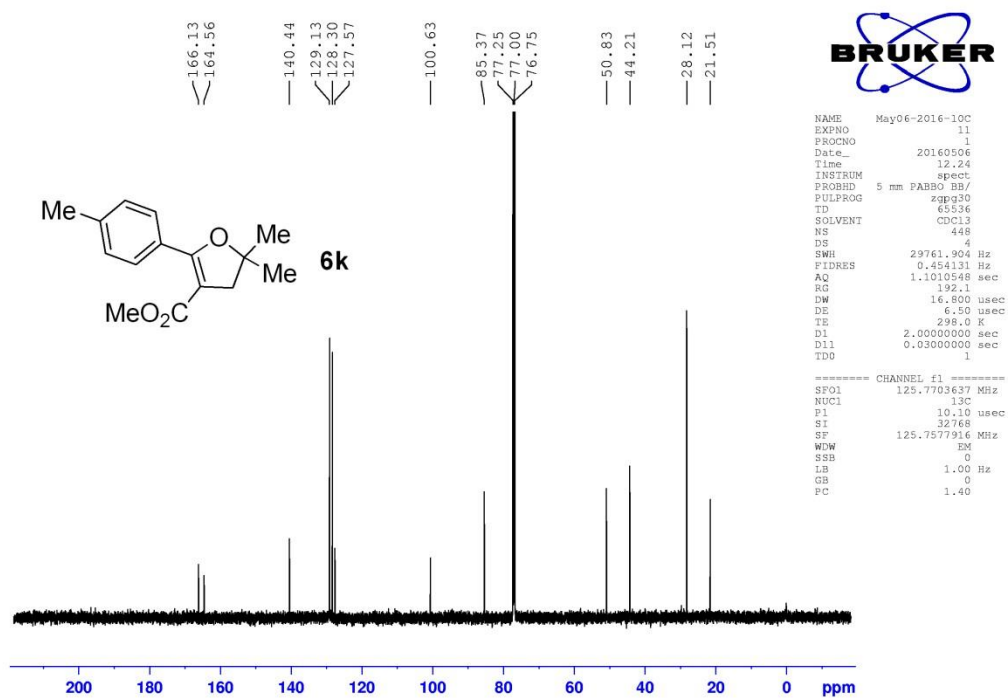

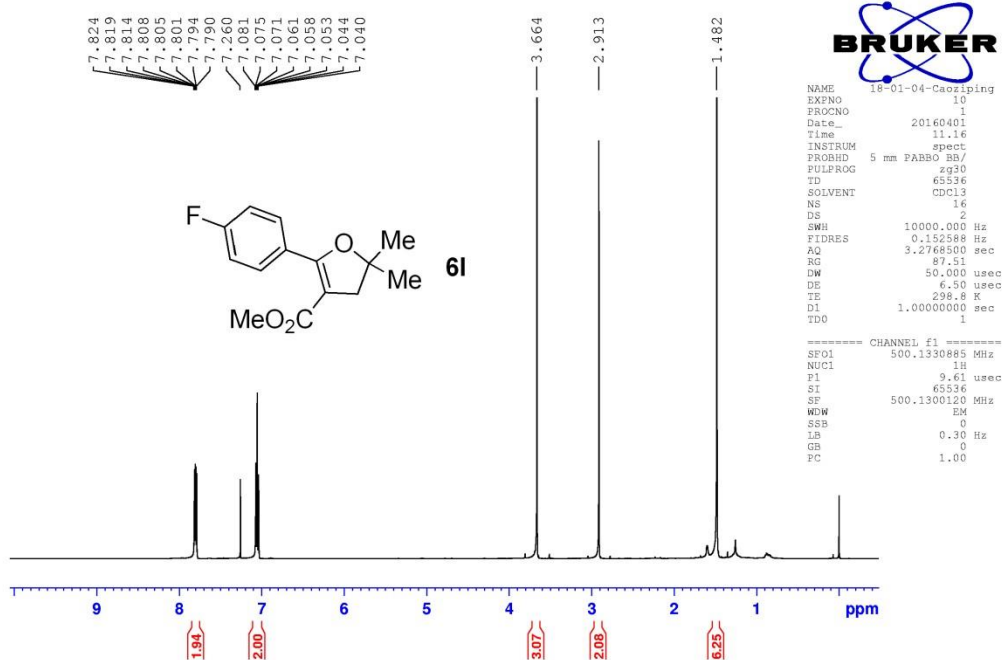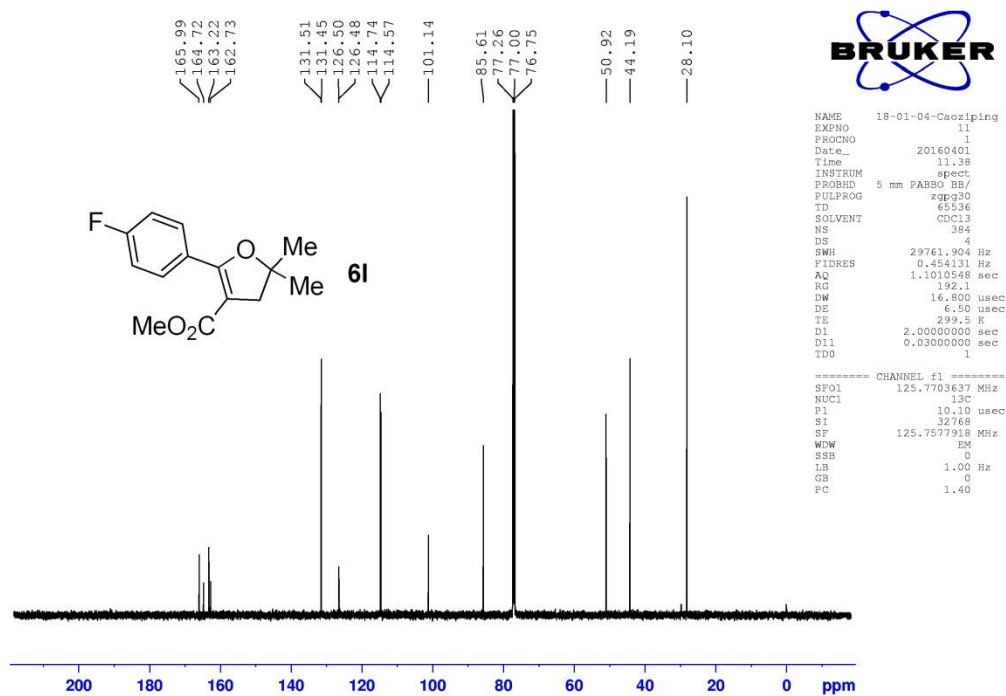



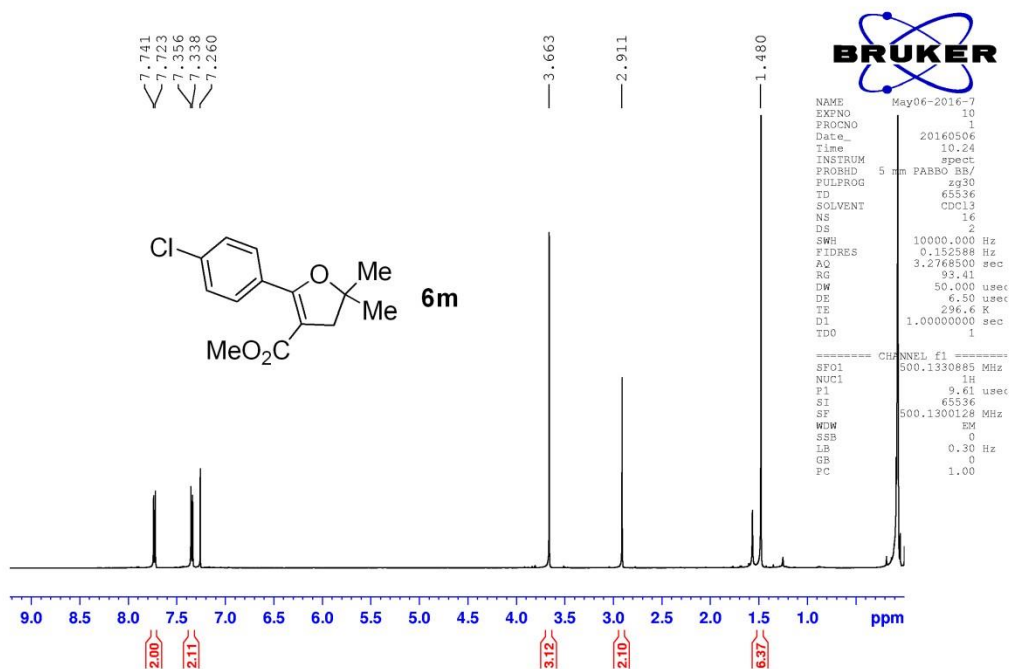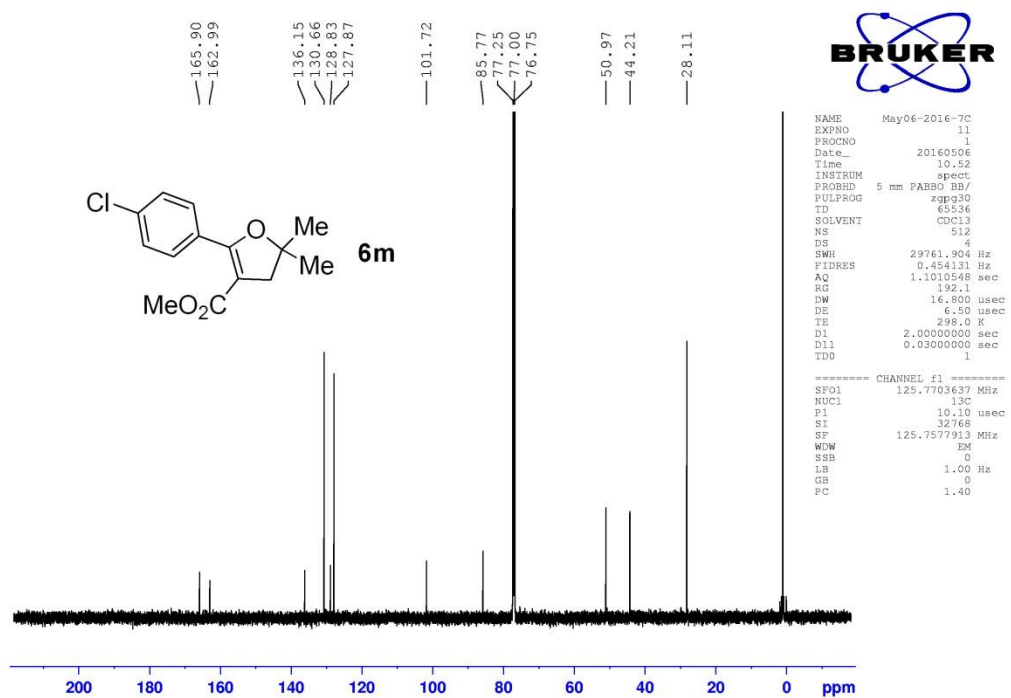

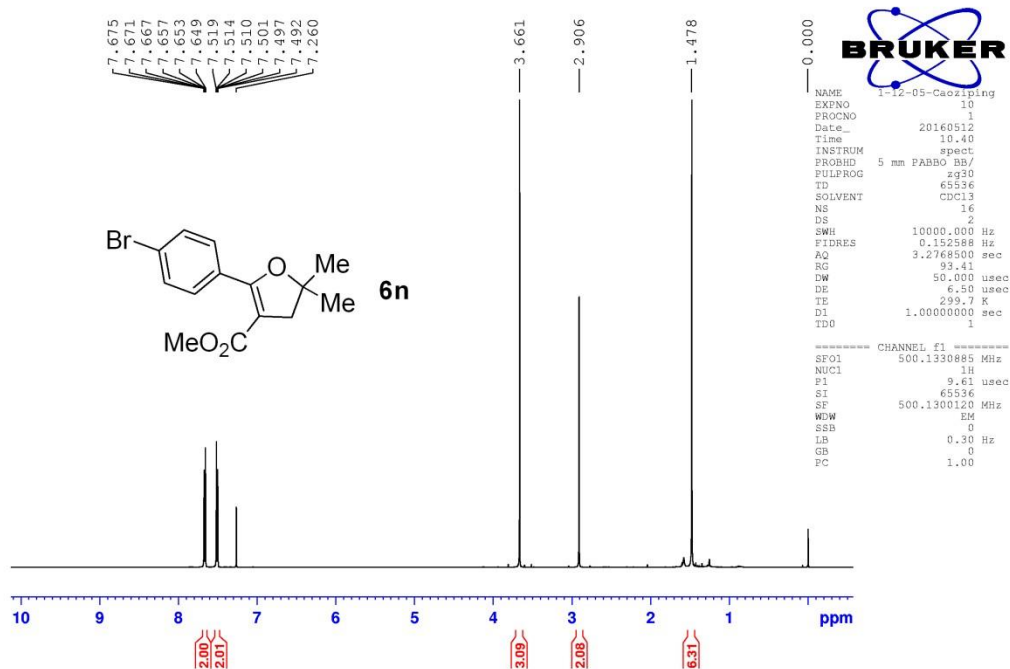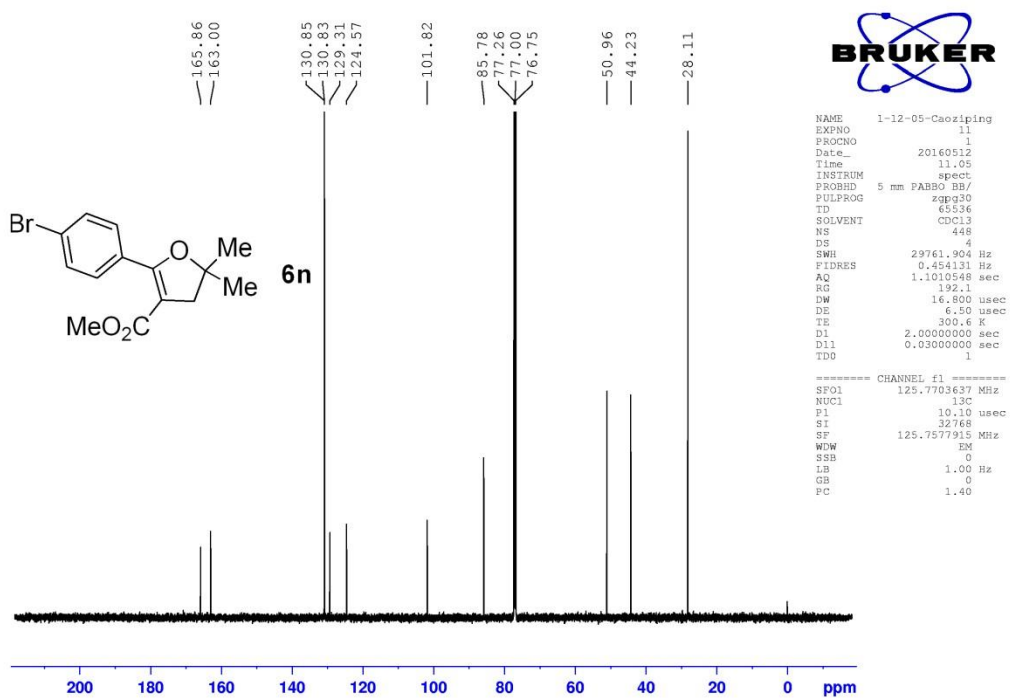

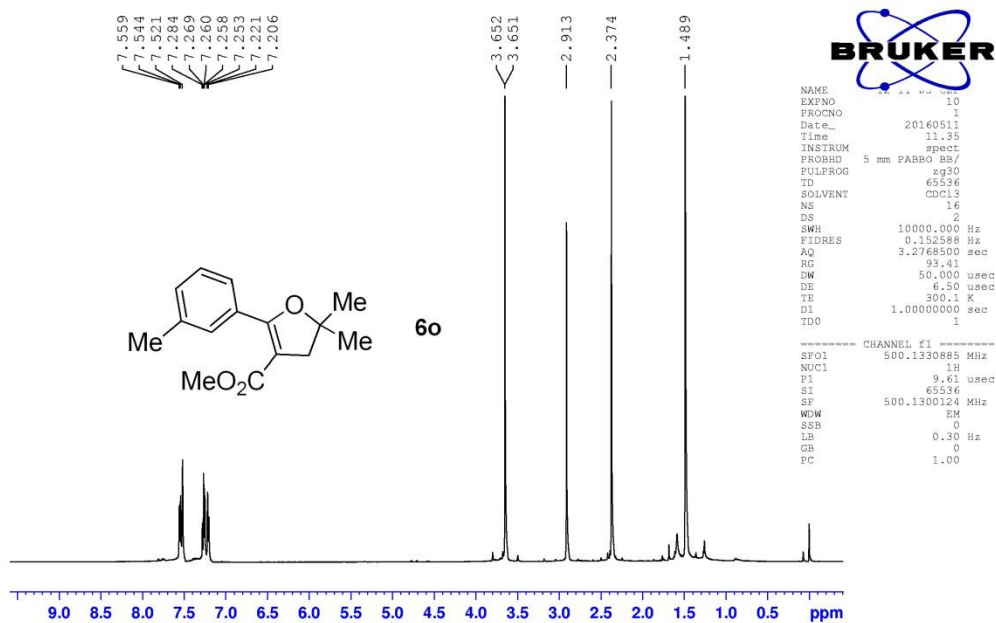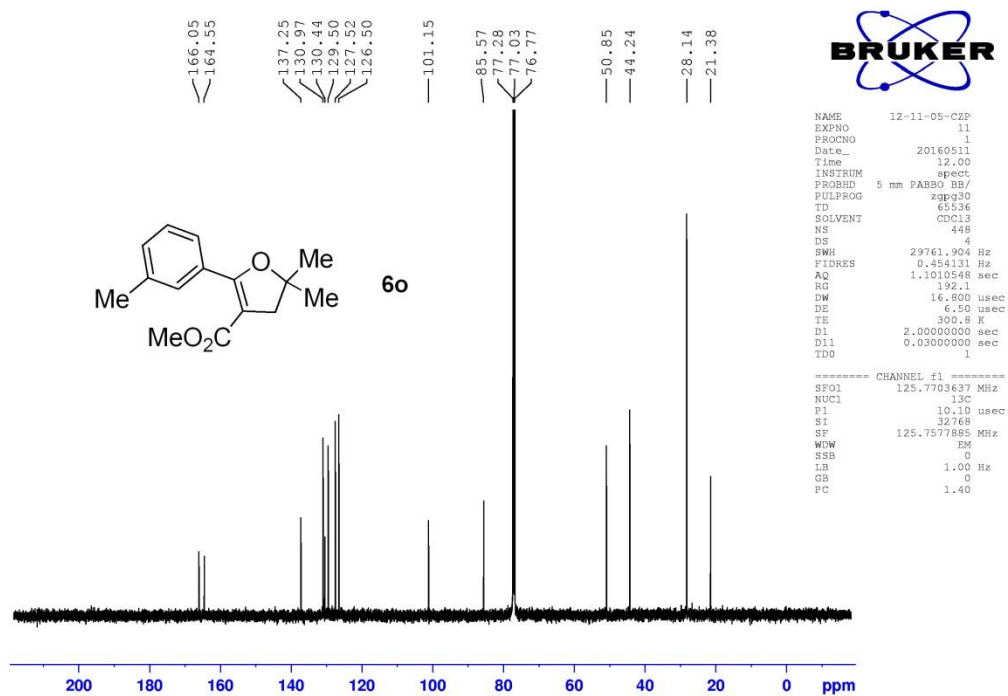

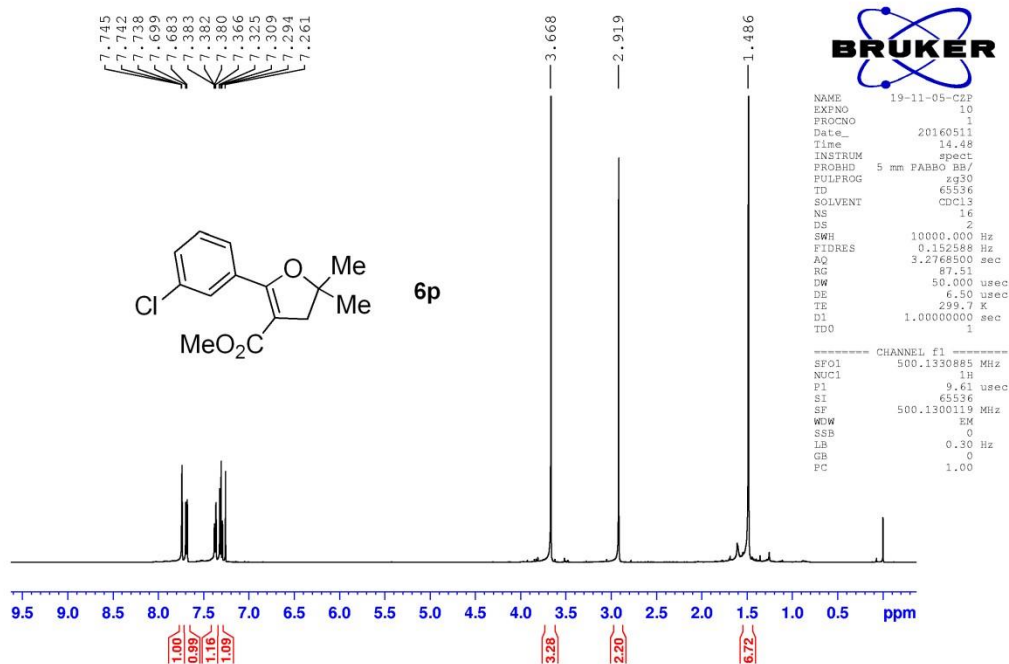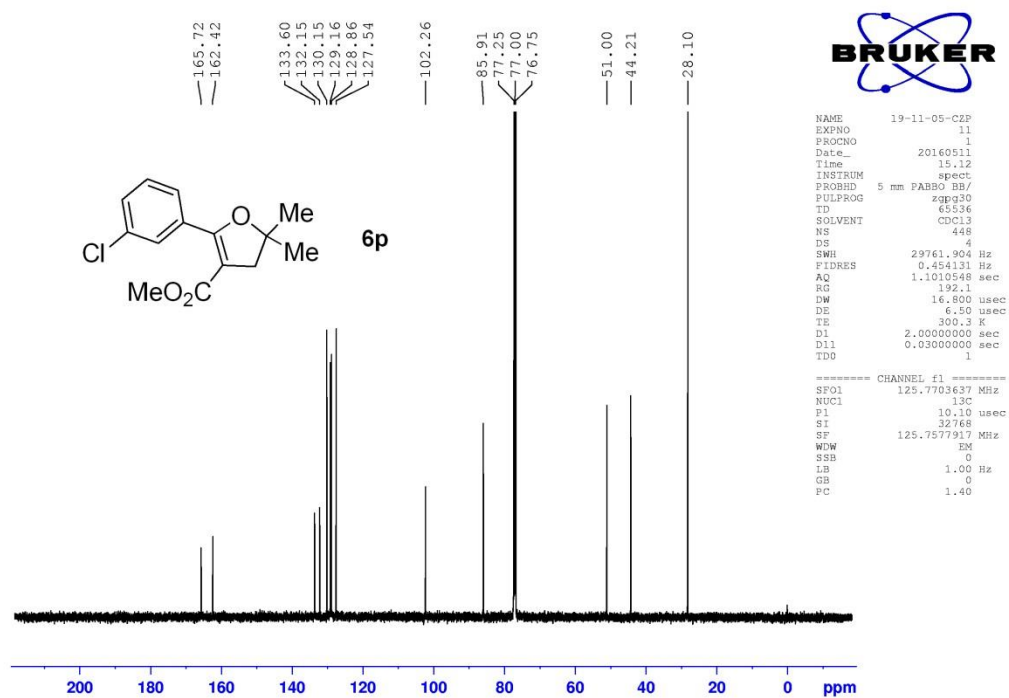

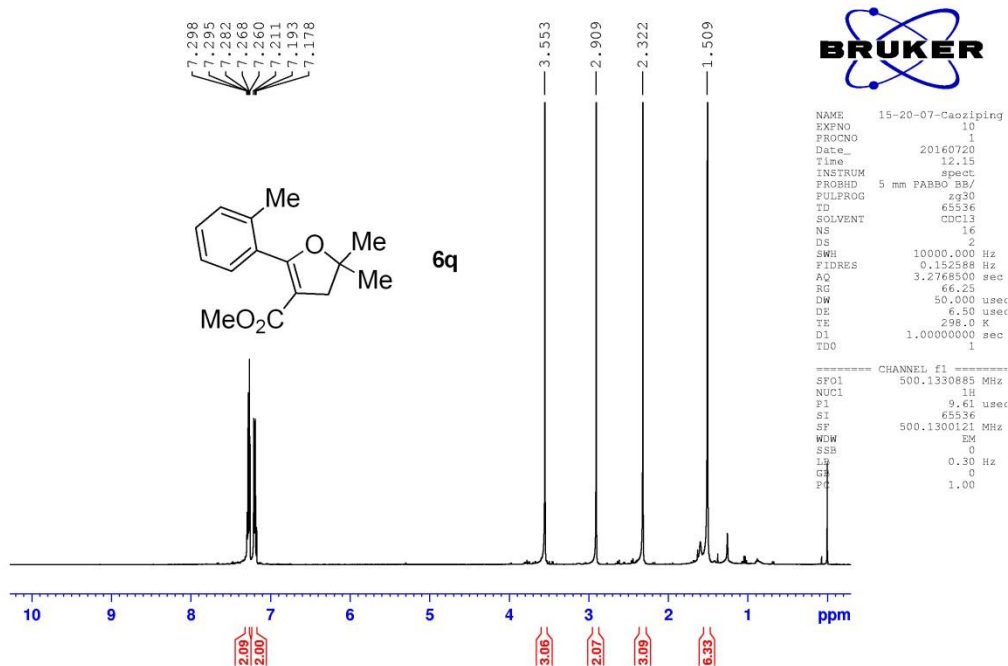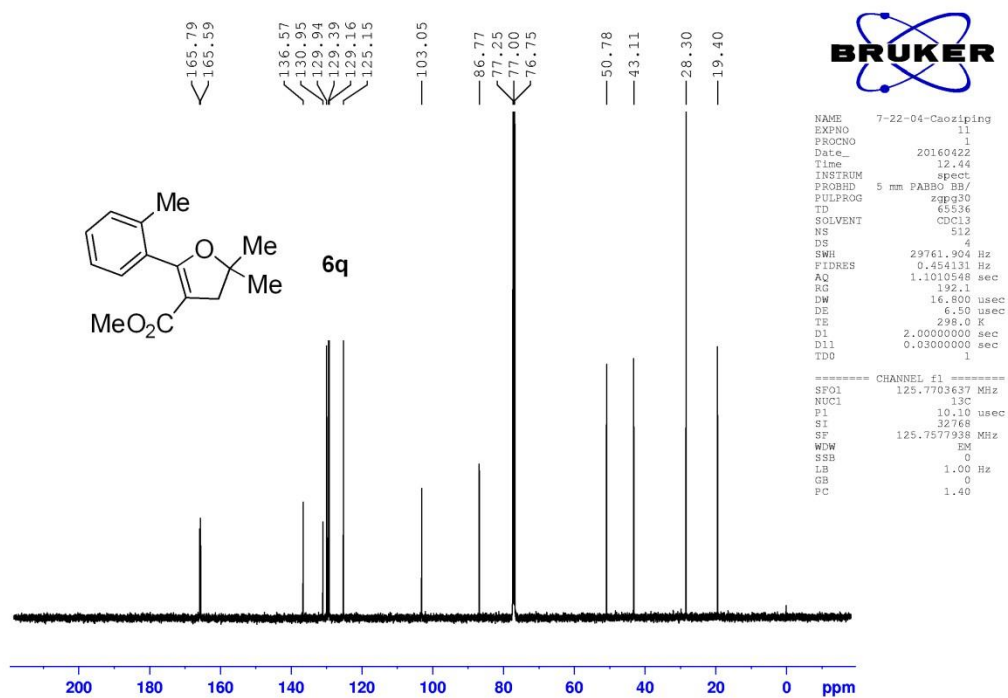

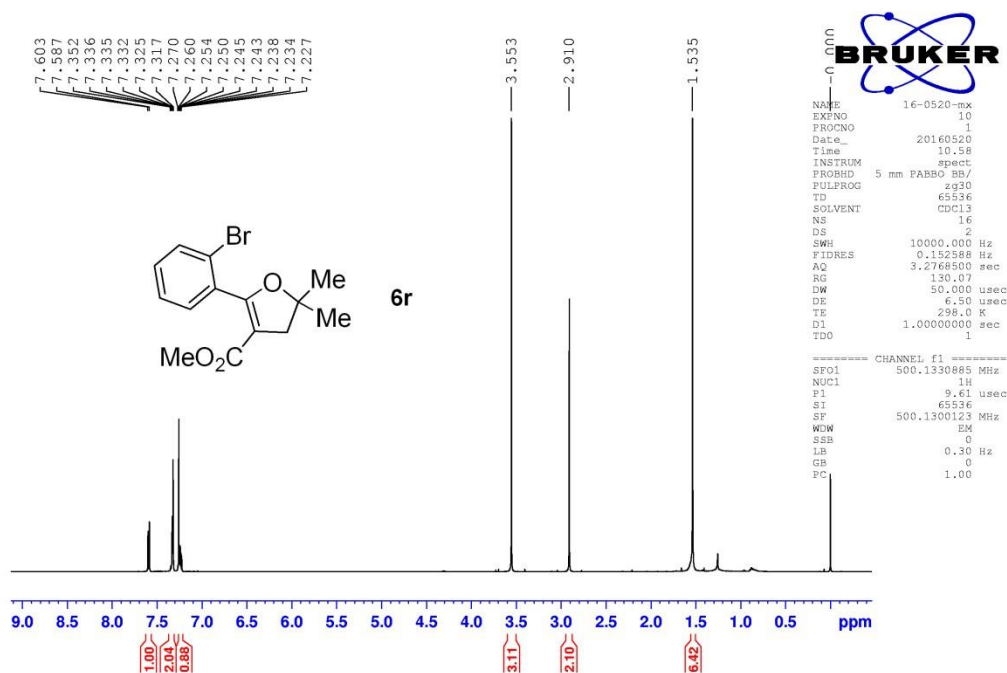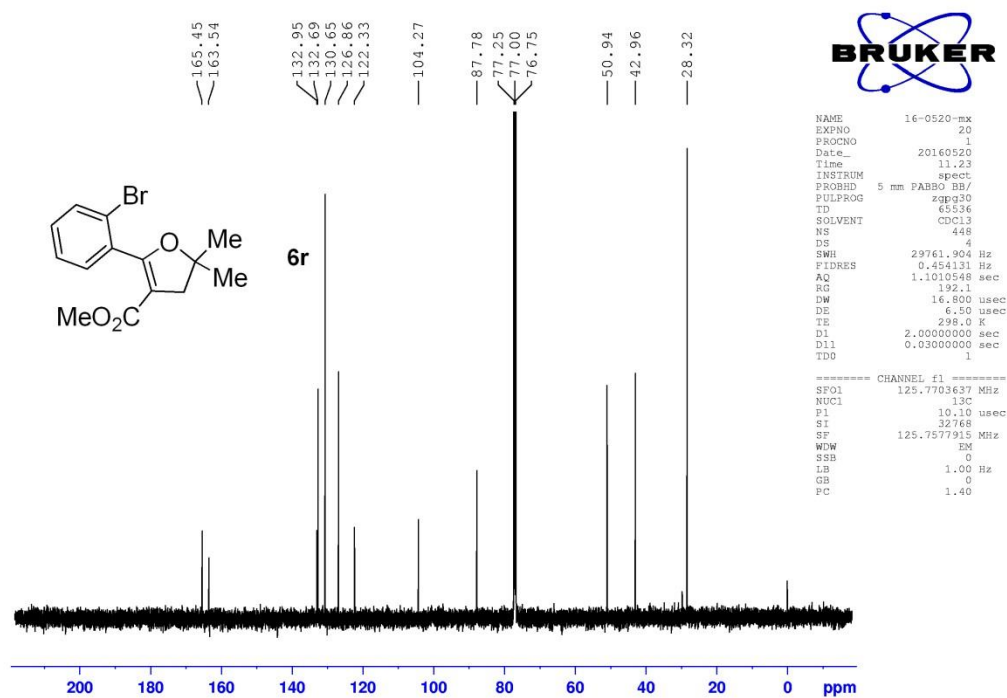

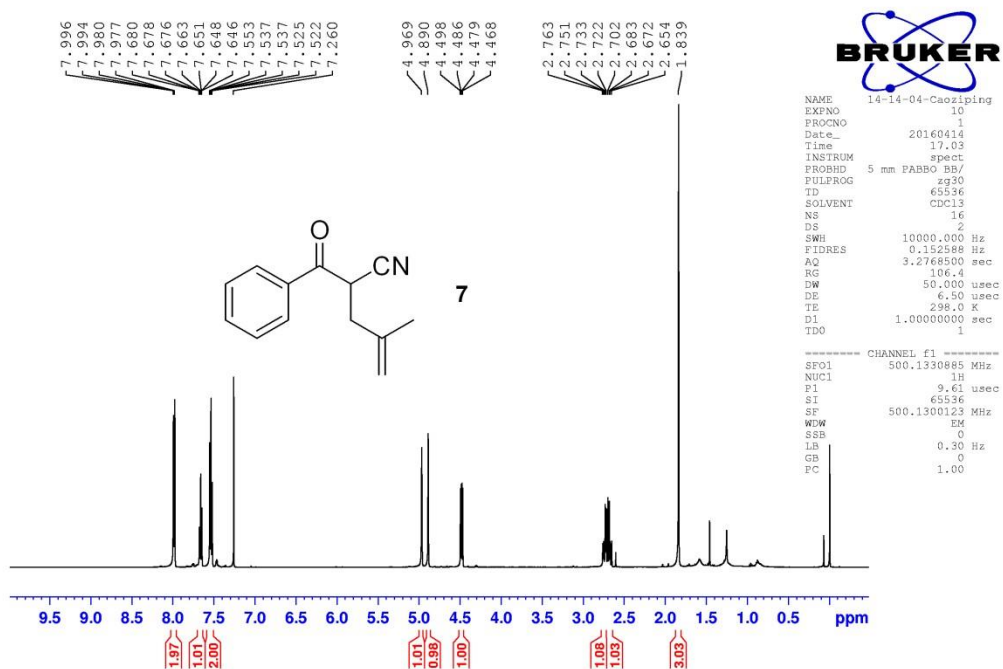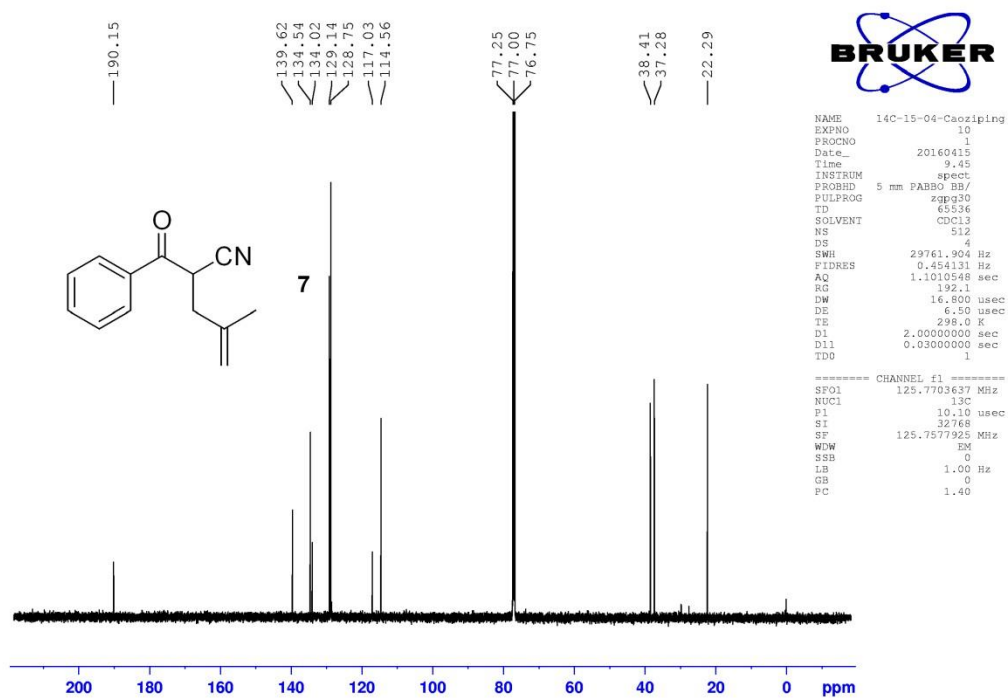

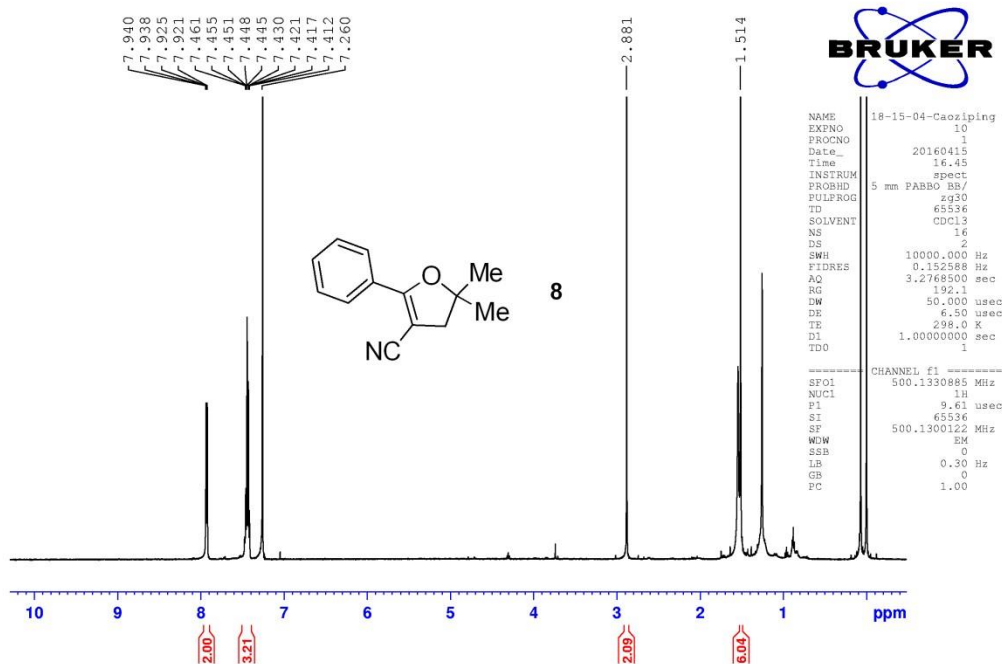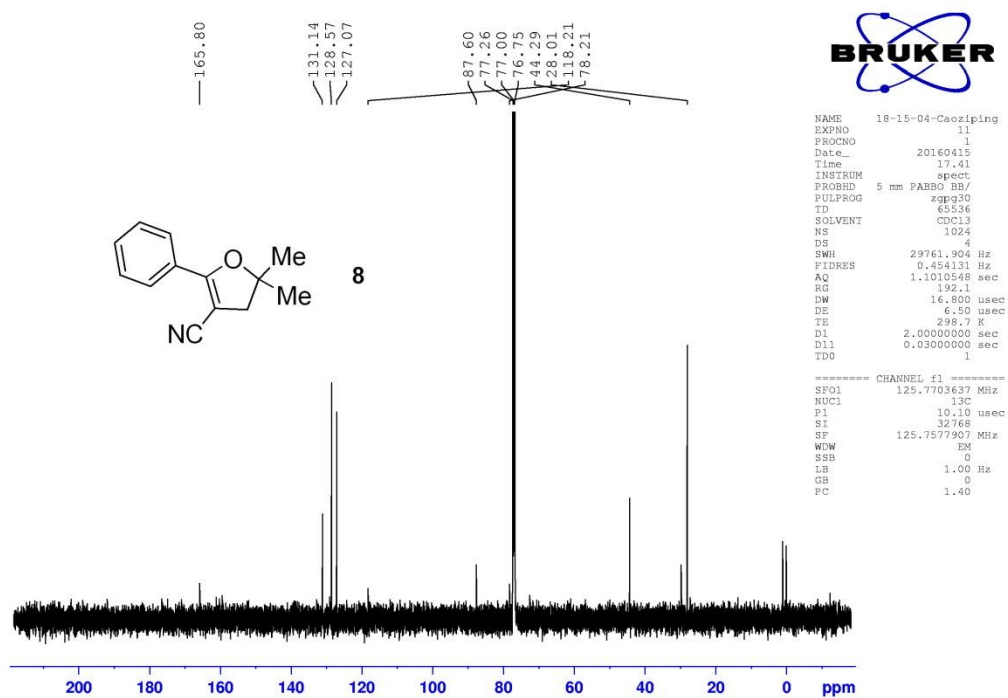

Supplement: c6ra14051c1.pdf [file c6ra14051c1.pdf]
